# Supplementary material for: Polyporenic Acids from the Mushroom Buglossoporus quercinus Possess Chemosensitizing and Efflux Pump Inhibitory Activities on Colo 320 Adenocarcinoma Cells
Source: MDPI journal article supplement (doi:10.3390/jof9090923), 2023-09-13
Supplement: s1 [file s1]

# Polyporenic Acids from The Mushroom *Buglossoporus quercinus* Possess Chemosensitizing and Efflux Pump Inhibitory Activities on Colo 320 Adenocarcinoma Cells

Kristóf Felegyi<sup>1</sup>, Zsófia Garádi<sup>1,2</sup>, Bálint Rácz<sup>3</sup>, Gábor Tóth<sup>3,4</sup>, Viktor Papp<sup>5</sup>, Imre Boldizsár<sup>1,6</sup>, András Dancsó<sup>2</sup>, Gabriella Spengler<sup>3</sup>, Szabolcs Béni<sup>1,7</sup> and Attila Ványolós<sup>1,\*</sup>

- <sup>1</sup> Department of Pharmacognosy, Semmelweis University, 1085 Budapest, Hungary; felegyi.kristof@pharma.semmelweis-univ.hu (K.F.); garadi.zsofia@pharma.semmelweis-univ.hu (Z.G.); boldizsar.imre@semmelweis.hu (I.B.); beni.szabolcs@semmelweis.hu (S.B.)
  - <sup>2</sup> Directorate of Drug Substance Development, Egis Pharmaceuticals Plc., 1475 Budapest, Hungary; dancso.andras@egis.hu
  - <sup>3</sup> Albert Szent-Györgyi Health Center, Department of Medical Microbiology, Albert Szent-Györgyi Medical School, University of Szeged, 6725 Szeged, Hungary; racz.balint@med.u-szeged.hu (B.R.); toth.gabor.1@med.u-szeged.hu (G.T.); spengler.gabriella@med.u-szeged.hu (G.S.)
  - <sup>4</sup> ELKH-USZ Biologically Active Natural Products Research Group, University of Szeged, 6720 Szeged, Hungary
  - <sup>5</sup> Department of Botany, Hungarian University of Agriculture and Life Sciences, 1118 Budapest, Hungary; papp.viktor@uni-mate.hu
  - <sup>6</sup> Department of Plant Anatomy, Institute of Biology, Eötvös Loránd University, 1117 Budapest, Hungary
  - <sup>7</sup> Department of Analytical Chemistry, Institute of Chemistry, Eötvös Loránd University, 1117 Budapest, Hungary
- \* Correspondence: vanyolos.attila@semmelweis.hu

## TABLE OF CONTENTS

|                                                                                                               |    |
|---------------------------------------------------------------------------------------------------------------|----|
| Figure S1. HR-ESI-MS spectrum of compound <b>1</b>                                                            | 6  |
| Figure S2. MS-MS spectrum of compound <b>1</b>                                                                | 7  |
| Figure S3. <sup>1</sup> H spectrum of compound <b>1</b> (600 MHz, THF-d <sub>8</sub> , 295 K)                 | 7  |
| Figure S4. <sup>13</sup> C spectrum of compound <b>1</b> (150 MHz, THF- d <sub>8</sub> , 295 K)               | 8  |
| Figure S5. COSY spectrum of compound <b>1</b> (600 MHz, THF- d <sub>8</sub> , 295 K)                          | 8  |
| Figure S6. DEPT-edited HSQC spectrum of compound <b>1</b> (600 MHz, THF- d <sub>8</sub> , 295 K)              | 9  |
| Figure S7. HMBC spectrum of compound <b>1</b> (600 MHz, THF- d <sub>8</sub> , 295 K)                          | 10 |
| Figure S8. NOESY spectrum of compound <b>1</b> (600 MHz, THF- d <sub>8</sub> , 295 K)                         | 11 |
| Figure S9. Selected region of the NOESY spectrum of compound <b>1</b> (600 MHz, THF- d <sub>8</sub> , 295 K)  | 11 |
| Figure S10. HR-ESI-MS spectrum of compound <b>2</b>                                                           | 12 |
| Figure S11. MS-MS spectrum of compound <b>2</b>                                                               | 13 |
| Figure S12. <sup>1</sup> H spectrum of compound <b>2</b> (600 MHz, THF- d <sub>8</sub> , 295 K)               | 13 |
| Figure S13. <sup>13</sup> C spectrum of compound <b>2</b> (150 MHz, THF- d <sub>8</sub> , 295 K)              | 14 |
| Figure S14. COSY spectrum of compound <b>2</b> (600 MHz, THF- d <sub>8</sub> , 295 K)                         | 14 |
| Figure S15. DEPT-edited HSQC spectrum of compound <b>2</b> (600 MHz, THF- d <sub>8</sub> , 295 K)             | 15 |
| Figure S16. HMBC spectrum of compound <b>2</b> (600 MHz, THF- d <sub>8</sub> , 295 K)                         | 16 |
| Figure S17. NOESY spectrum of compound <b>2</b> (600 MHz, THF- d <sub>8</sub> , 295 K)                        | 17 |
| Figure S18. Selected region of the NOESY spectrum of compound <b>2</b> (600 MHz, THF- d <sub>8</sub> , 295 K) | 17 |
| Figure S19. HR-ESI-MS spectrum of compound <b>3</b>                                                           | 18 |
| Figure S20. MS-MS spectrum of compound <b>3</b>                                                               | 19 |
| Figure S21. <sup>1</sup> H spectrum of compound <b>3</b> (600 MHz, CDCl <sub>3</sub> , 295 K)                 | 19 |
| Figure S22. <sup>13</sup> C spectrum of compound <b>3</b> (150 MHz, CDCl <sub>3</sub> , 295 K)                | 20 |
| Figure S23. COSY spectrum of compound <b>3</b> (600 MHz, CDCl <sub>3</sub> , 295 K)                           | 20 |
| Figure S24. DEPT-edited HSQC spectrum of compound <b>3</b> (600 MHz, CDCl <sub>3</sub> , 295 K)               | 21 |
| Figure S25. HMBC spectrum of compound <b>3</b> (600 MHz, CDCl <sub>3</sub> , 295 K)                           | 21 |
| Figure S26. NOESY spectrum of compound <b>3</b> (600 MHz, CDCl <sub>3</sub> , 295 K)                          | 22 |
| Figure S27. HR-ESI-MS spectrum of compound <b>4</b>                                                           | 23 |
| Figure S28. MS-MS spectrum of compound <b>4</b>                                                               | 23 |
| Figure S29. <sup>1</sup> H spectrum of compound <b>4</b> (600 MHz, CDCl <sub>3</sub> , 295 K)                 | 24 |
| Figure S30. <sup>13</sup> C spectrum of compound <b>4</b> (150 MHz, CDCl <sub>3</sub> , 295 K)                | 24 |
| Figure S31. COSY spectrum of compound <b>4</b> (600 MHz, CDCl <sub>3</sub> , 295 K)                           | 25 |
| Figure S32. DEPT-edited HSQC spectrum of compound <b>4</b> (600 MHz, CDCl <sub>3</sub> , 295 K)               | 25 |
| Figure S33. HMBC spectrum of compound <b>4</b> (600 MHz, CDCl <sub>3</sub> , 295 K)                           | 26 |
| Figure S34. Selective gradient NOESY spectrum of compound <b>4</b> (600 MHz, CDCl <sub>3</sub> , 295 K)       | 26 |

|                                                                                                                               |    |
|-------------------------------------------------------------------------------------------------------------------------------|----|
| Figure S35. HR-ESI-MS spectrum of compound <b>5</b>                                                                           | 27 |
| Figure S36. MS-MS spectrum of compound <b>5</b>                                                                               | 28 |
| Figure S37. $^1\text{H}$ spectrum of compound <b>5</b> (600 MHz, pyridine- $\text{d}_5$ , 295 K)                              | 28 |
| Figure S38. $^{13}\text{C}$ spectrum of compound <b>5</b> (150 MHz, pyridine- $\text{d}_5$ , 295 K)                           | 29 |
| Figure S39. COSY spectrum of compound <b>5</b> (600 MHz, pyridine- $\text{d}_5$ , 295 K)                                      | 29 |
| Figure S40. DEPT-edited HSQC spectrum of compound <b>5</b> (600 MHz, pyridine- $\text{d}_5$ , 295 K)                          | 30 |
| Figure S41. HMBC spectrum of compound <b>5</b> (600 MHz, pyridine- $\text{d}_5$ , 295 K)                                      | 30 |
| Figure S42. DEPT-edited HSQC spectrum of compound <b>5</b> (600 MHz, $\text{CD}_3\text{OD}$ : pyridine- $\text{d}_5$ , 295 K) | 31 |
| Figure S43. HMBC spectrum of compound <b>5</b> (600 MHz, $\text{CD}_3\text{OD}$ : pyridine- $\text{d}_5$ (19:1), 295 K)       | 31 |
| Figure S44. ROESY spectrum of compound <b>5</b> (600 MHz, $\text{CD}_3\text{OD}$ : pyridine- $\text{d}_5$ (19:1), 295 K)      | 32 |
| Figure S45. HR-ESI-MS spectrum of compound <b>6</b>                                                                           | 33 |
| Figure S46. MS-MS spectrum of compound <b>6</b>                                                                               | 33 |
| Figure S47. $^1\text{H}$ spectrum of compound <b>6</b> (150 MHz, $\text{CD}_3\text{OD}$ , 295 K)                              | 34 |
| Figure S48. $^{13}\text{C}$ spectrum of compound <b>6</b> (600 MHz, $\text{CD}_3\text{OD}$ , 295 K)                           | 34 |
| Figure S49. COSY spectrum of compound <b>6</b> (600 MHz, $\text{CD}_3\text{OD}$ , 295 K)                                      | 35 |
| Figure S50. DEPT-edited HSQC spectrum of compound <b>6</b> (600 MHz $\text{CD}_3\text{OD}$ , 295 K)                           | 35 |
| Figure S51. HMBC spectrum of compound <b>6</b> (600 MHz, $\text{CD}_3\text{OD}$ , 295 K)                                      | 36 |
| Figure S52. NOESY spectrum of compound <b>6</b> (600 MHz, $\text{CD}_3\text{OD}$ , 295 K)                                     | 36 |
| Figure S53. $^1\text{H}$ spectrum of compound <b>6</b> (600 MHz, $\text{CDCl}_3$ , 295 K)                                     | 37 |
| Figure S54. DEPT-edited HSQC spectrum of compound <b>6</b> (600 MHz, $\text{CDCl}_3$ , 295 K)                                 | 37 |
| Figure S55. HMBC spectrum of compound <b>6</b> (600 MHz, $\text{CDCl}_3$ , 295 K)                                             | 38 |
| Figure S56. HR-ESI-MS spectrum of compound <b>7</b>                                                                           | 39 |
| Figure S57. MS-MS spectrum of compound <b>7</b>                                                                               | 40 |
| Figure S58. $^1\text{H}$ spectrum of compound <b>7</b> (600 MHz, $\text{CDCl}_3$ , 295 K)                                     | 40 |
| Figure S59. $^{13}\text{C}$ spectrum of compound <b>7</b> (150 MHz, $\text{CDCl}_3$ , 295 K),                                 | 41 |
| Figure S60. COSY spectrum of compound <b>7</b> (600 MHz, $\text{CDCl}_3$ , 295 K)                                             | 41 |
| Figure S61. DEPT-edited HSQC spectrum of compound <b>7</b> (600 MHz, $\text{CDCl}_3$ , 295 K)                                 | 42 |
| Figure S62. HMBC spectrum of compound <b>7</b> (600 MHz, $\text{CDCl}_3$ , 295 K)                                             | 42 |
| Figure S63. ROESY spectrum of compound <b>7</b> (600 MHz, $\text{CDCl}_3$ , 295 K)                                            | 43 |
| Figure S64. HR-ESI-MS spectrum of compound <b>8</b>                                                                           | 44 |
| Figure S65. MS-MS spectrum of compound <b>8</b>                                                                               | 45 |
| Figure S66. $^1\text{H}$ spectrum of compound <b>8</b> (600 MHz, $\text{CDCl}_3$ , 295 K)                                     | 45 |
| Figure S67. $^{13}\text{C}$ spectrum of compound <b>8</b> (150 MHz, $\text{CDCl}_3$ , 295 K)                                  | 46 |
| Figure S68. COSY spectrum of compound <b>8</b> (600 MHz, $\text{CDCl}_3$ , 295 K)                                             | 46 |
| Figure S69. DEPT-edited HSQC spectrum of compound <b>8</b> (600 MHz, $\text{CDCl}_3$ , 295 K)                                 | 47 |
| Figure S70. HMBC spectrum of compound <b>8</b> (600 MHz, $\text{CDCl}_3$ , 295 K)                                             | 47 |

|                                                                                                                                                                                                                                                                                             |    |
|---------------------------------------------------------------------------------------------------------------------------------------------------------------------------------------------------------------------------------------------------------------------------------------------|----|
| Figure S71. ROESY spectrum of compound <b>8</b> (600 MHz, CDCl <sub>3</sub> , 295 K)                                                                                                                                                                                                        | 48 |
| Figure S72. HR-ESI-MS spectrum of compound <b>9</b>                                                                                                                                                                                                                                         | 49 |
| Figure S73. MS-MS spectrum of compound <b>9</b>                                                                                                                                                                                                                                             | 50 |
| Figure S74. <sup>1</sup> H spectrum of compound <b>9</b> (600 MHz, CDCl <sub>3</sub> , 295 K)                                                                                                                                                                                               | 50 |
| Figure S75. <sup>13</sup> C spectrum of compound <b>9</b> (150 MHz, CDCl <sub>3</sub> , 295 K)                                                                                                                                                                                              | 51 |
| Figure S76. COSY spectrum of compound <b>9</b> (600 MHz, CDCl <sub>3</sub> , 295 K)                                                                                                                                                                                                         | 51 |
| Figure S77. DEPT-edited HSQC spectrum of compound <b>9</b> (600 MHz, CDCl <sub>3</sub> , 295 K)                                                                                                                                                                                             | 52 |
| Figure S78. HMBC spectrum of compound <b>9</b> (600 MHz, CDCl <sub>3</sub> , 295 K)                                                                                                                                                                                                         | 52 |
| Figure S79. NOESY spectrum of compound <b>9</b> (600 MHz, CDCl <sub>3</sub> , 295 K)                                                                                                                                                                                                        | 53 |
| Figure S80. NOESY spectrum of compound <b>9</b> (600 MHz, CDCl <sub>3</sub> , 295 K)                                                                                                                                                                                                        | 53 |
| Figure S81. HR-ESI-MS spectrum of compound <b>10</b>                                                                                                                                                                                                                                        | 54 |
| Figure S82. MS-MS spectrum of compound <b>10</b>                                                                                                                                                                                                                                            | 55 |
| Figure S83. <sup>1</sup> H spectrum of compound <b>10</b> (600 MHz, pyridine-d <sub>5</sub> , 295 K)                                                                                                                                                                                        | 55 |
| Figure S84. <sup>13</sup> C spectrum of compound <b>10</b> (150 MHz, pyridine-d <sub>5</sub> , 295 K)                                                                                                                                                                                       | 56 |
| Figure S85. COSY spectrum of compound <b>10</b> (600 MHz, pyridine-d <sub>5</sub> , 295 K)                                                                                                                                                                                                  | 56 |
| Figure S86. DEPT-edited HSQC spectrum of compound <b>10</b> (600 MHz, pyridine-d <sub>5</sub> , 295 K)                                                                                                                                                                                      | 57 |
| Figure S87. HMBC spectrum of compound <b>10</b> (600 MHz, pyridine-d <sub>5</sub> , 295 K)                                                                                                                                                                                                  | 57 |
| Figure S88. NOESY spectrum of compound <b>10</b> (600 MHz, pyridine-d <sub>5</sub> , 295 K)                                                                                                                                                                                                 | 58 |
| Figure S89. HR-ESI-MS spectrum of compound <b>11</b>                                                                                                                                                                                                                                        | 59 |
| Figure S90. MS-MS spectrum of compound <b>11</b>                                                                                                                                                                                                                                            | 60 |
| Figure S91. <sup>1</sup> H spectrum of compound <b>11</b> (600 MHz, CDCl <sub>3</sub> , 295 K)                                                                                                                                                                                              | 60 |
| Figure S92. <sup>13</sup> C spectrum of compound <b>11</b> (150 MHz, CDCl <sub>3</sub> , 295 K)                                                                                                                                                                                             | 61 |
| Figure S93. COSY spectrum of compound <b>11</b> (600 MHz, CDCl <sub>3</sub> , 295 K)                                                                                                                                                                                                        | 61 |
| Figure S94. DEPT-edited HSQC spectrum of compound <b>11</b> (600 MHz, CDCl <sub>3</sub> , 295 K)                                                                                                                                                                                            | 62 |
| Figure S95. HMBC spectrum of compound <b>11</b> (600 MHz, CDCl <sub>3</sub> , 295 K)                                                                                                                                                                                                        | 62 |
| Figure S96. NOESY spectrum of compound <b>11</b> (600 MHz, CDCl <sub>3</sub> , 295 K)                                                                                                                                                                                                       | 63 |
| Figure S97. HR-ESI-MS spectrum of compound <b>12</b>                                                                                                                                                                                                                                        | 64 |
| Figure S98. MS-MS spectrum of compound <b>12</b>                                                                                                                                                                                                                                            | 65 |
| Figure S99. <sup>1</sup> H spectrum of compound <b>12</b> (600 MHz, pyridine-d <sub>5</sub> , 295 K)                                                                                                                                                                                        | 65 |
| Figure S100. <sup>13</sup> C spectrum of compound <b>12</b> (150 MHz, pyridine-d <sub>5</sub> , 295 K)                                                                                                                                                                                      | 66 |
| Figure S101. COSY spectrum of compound <b>12</b> (600 MHz, pyridine-d <sub>5</sub> , 295 K)                                                                                                                                                                                                 | 66 |
| Figure S102. DEPT-edited HSQC spectrum of compound <b>12</b> (600 MHz, pyridine-d <sub>5</sub> , 295 K)                                                                                                                                                                                     | 67 |
| Figure S103. HMBC spectrum of compound <b>12</b> (600 MHz, pyridine-d <sub>5</sub> , 295 K)                                                                                                                                                                                                 | 67 |
| Figure S104. NOESY spectrum of compound <b>12</b> (600 MHz, pyridine-d <sub>5</sub> , 295 K)                                                                                                                                                                                                | 68 |
| Table S1. NMR Spectroscopic Data (600 MHz, CDCl <sub>3</sub> <sup>a</sup> , pyridine-d <sub>5</sub> <sup>b</sup> , tetrahydrofuran-d <sub>8</sub> <sup>c</sup> , or methanol-d <sub>4</sub> :pyridine-d <sub>5</sub> 19:1 <sup>d</sup> , methanol-d <sup>e</sup> ) for compounds <b>6-9</b> | 69 |



Table S2. NMR Spectroscopic Data (600 MHz, CDCl<sub>3</sub><sup>a</sup>, pyridine-*d*<sub>5</sub><sup>b</sup>, tetrahydrofuran-*d*<sub>8</sub><sup>c</sup>, or methanol-*d*:pyridine-*d*<sub>5</sub> 19:1<sup>d</sup>, methanol-*d*<sup>e</sup>) for compounds **10-12** 70

Table S3. Chemosensitizing Activity of Compounds **3-4**, and **7-12** on Colo 320 Adenocarcinoma Cells 71

Table S4. P-gp Efflux Pump Inhibitory Activity of Compounds **1-12** on MDR Colo 320 Colon Adenocarcinoma Cell Line 73

## Spectra and spectral data on compound 1

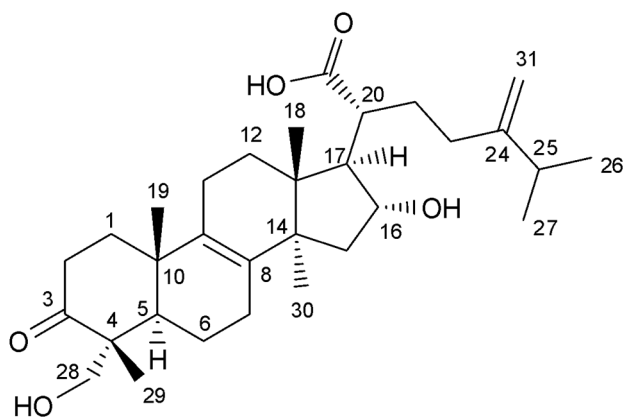

HR-ESI-MS (+)  $m/z$  501.3568  $[M + H]^+$  (501.3575 calcd. for  $C_{31}H_{49}O_5$ ;  $\Delta$  -1.3 ppm); HR-ESI-MSMS (CID = 15%, 30%, 45%) 483.3460, 465.3365, 453.3355

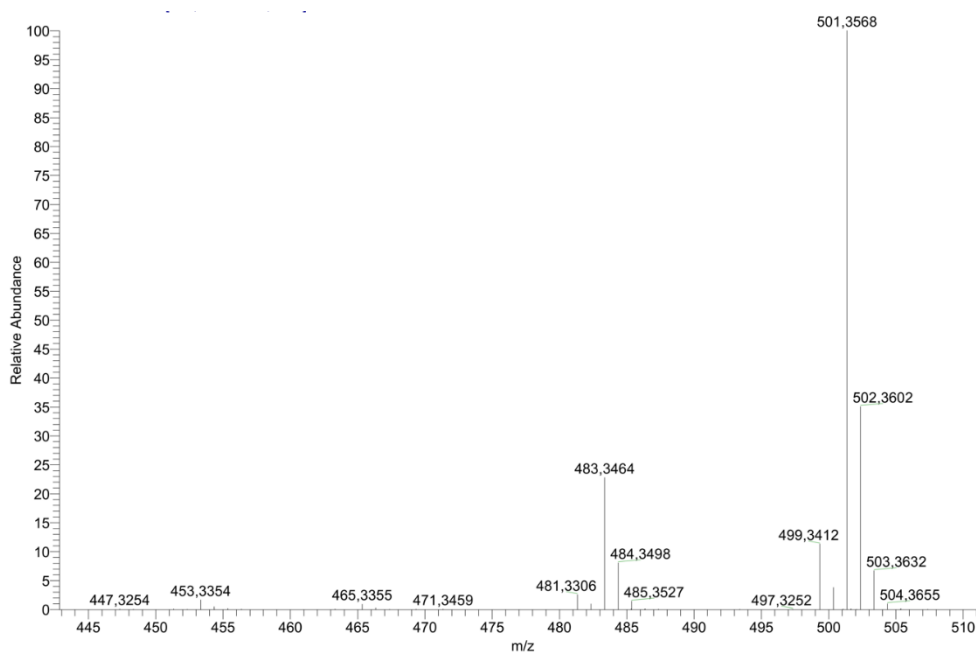

Figure S1. HR-ESI-MS spectrum of compound 1

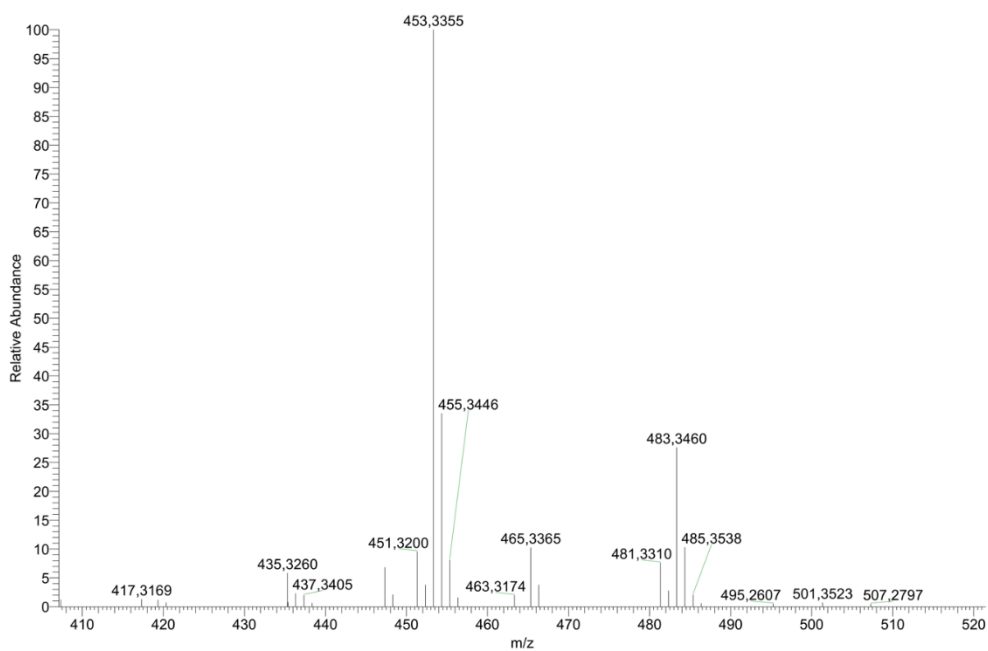

Figure S2. MS-MS spectrum of compound 1

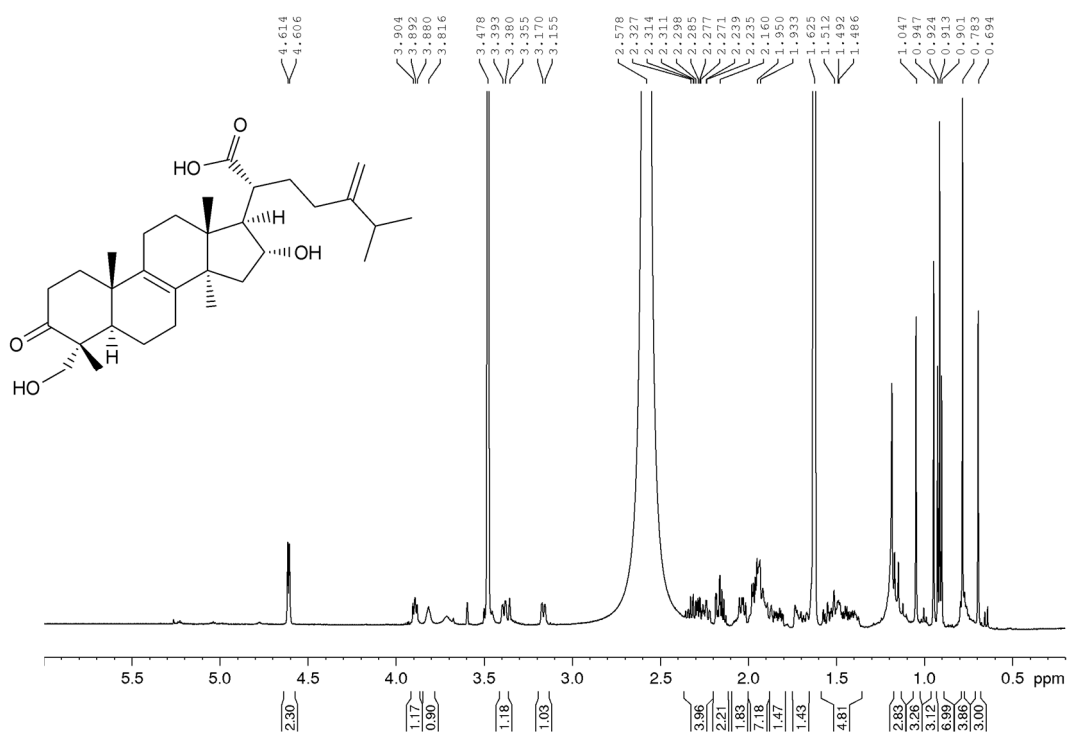

Figure S3. <sup>1</sup>H spectrum of compound 1 (600 MHz, THF-d<sub>8</sub>, 295 K)

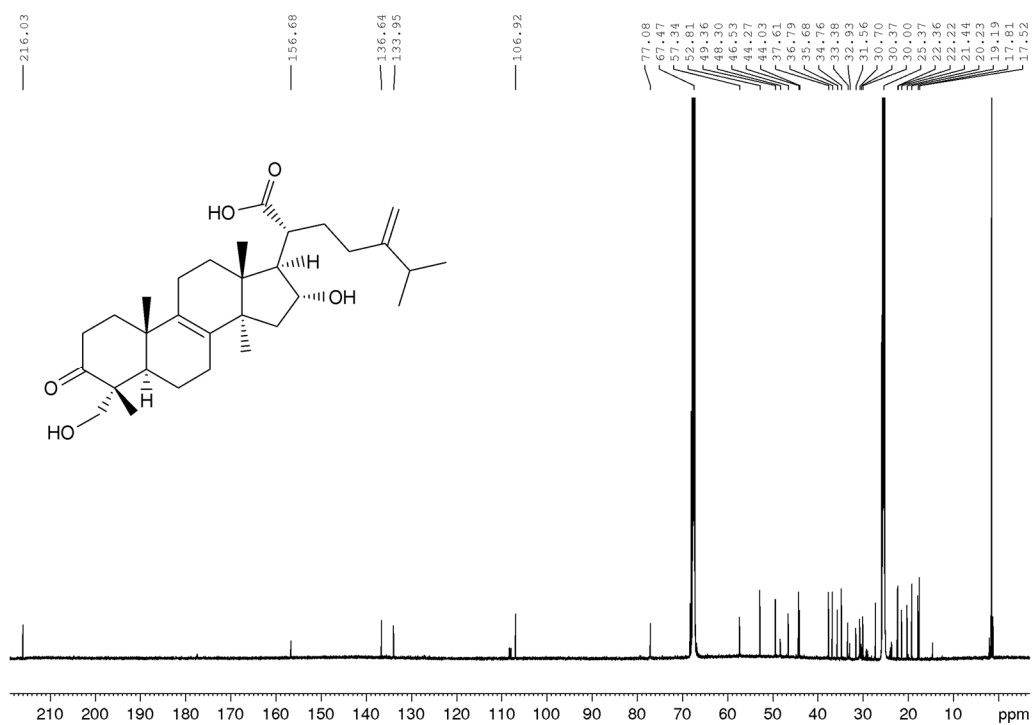

Figure S4.  $^{13}\text{C}$  spectrum of compound 1 (150 MHz,  $\text{THF-d}_8$ , 295 K)

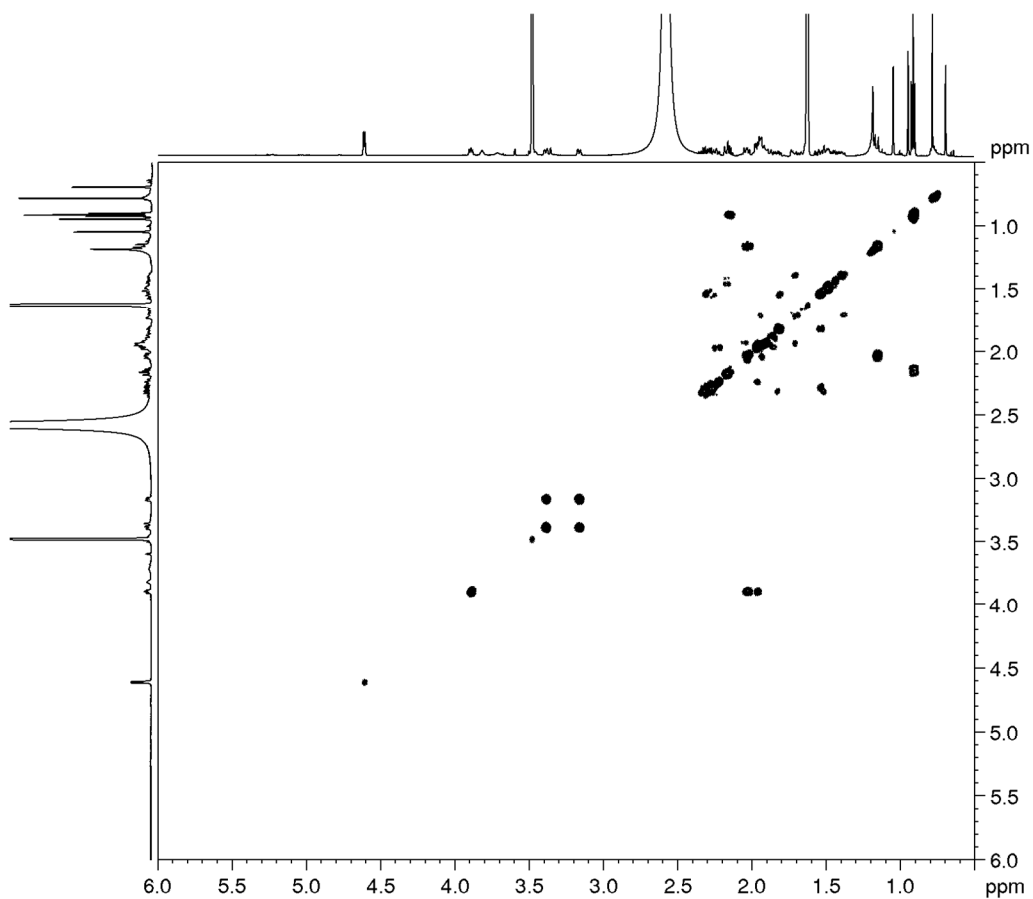

Figure S5. COSY spectrum of compound 1 (600 MHz,  $\text{THF-d}_8$ , 295 K)

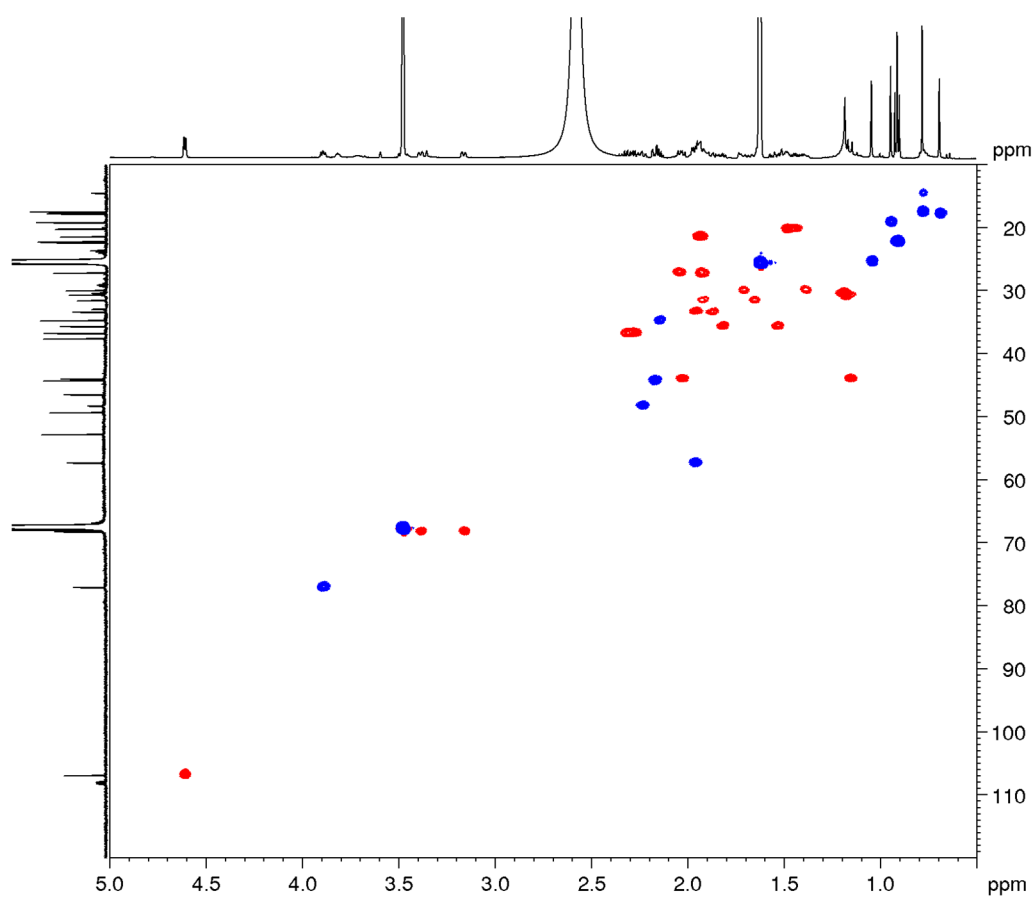

Figure S6. DEPT-edited HSQC spectrum of compound **1** (600 MHz, THF- $d_8$ , 295 K)

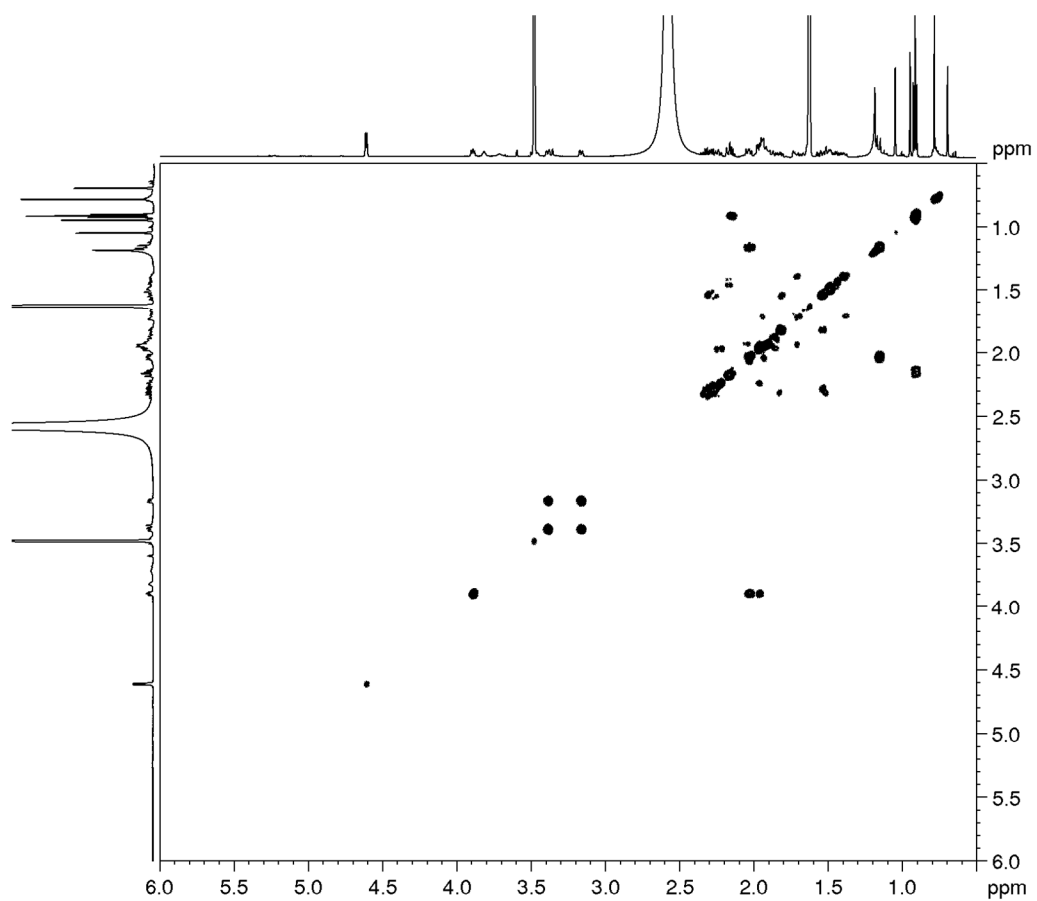

Figure S7. HMBC spectrum of compound **1** (600 MHz,  $\text{THF-}d_8$ , 295 K)

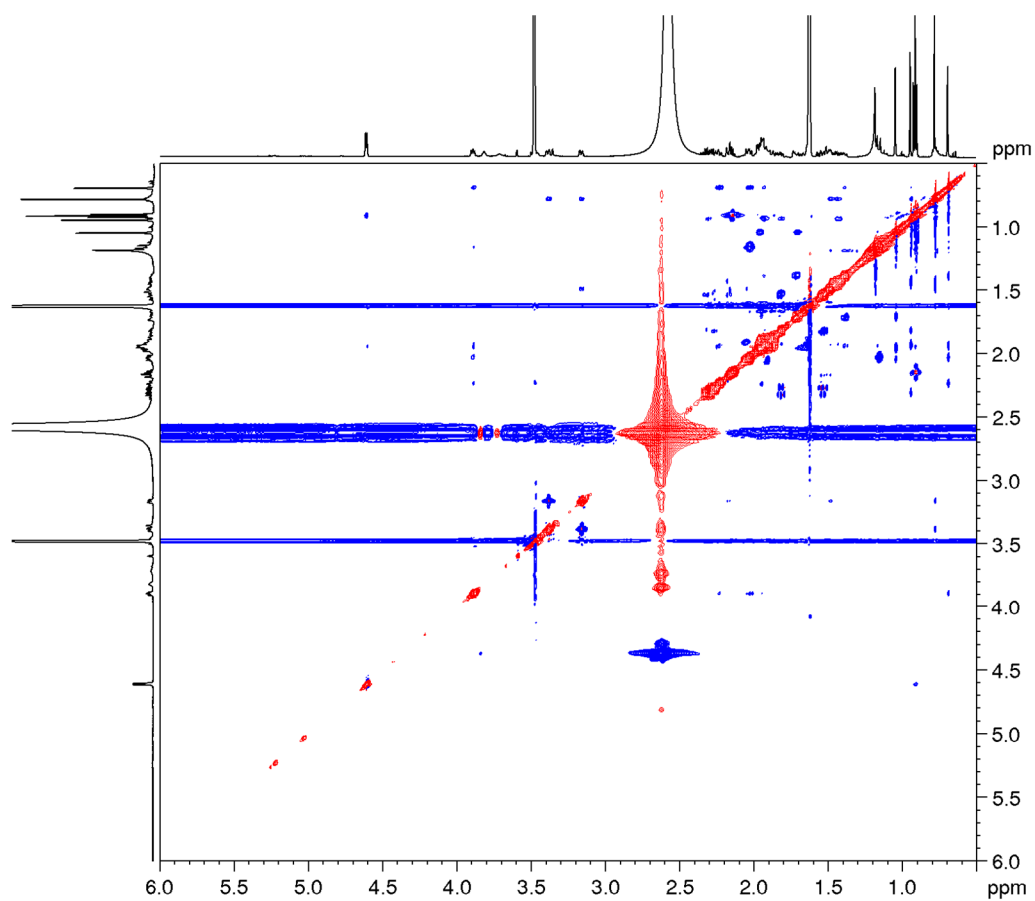

Figure S8. NOESY spectrum of compound **1** (600 MHz, THF-*d*<sub>8</sub>, 295 K)

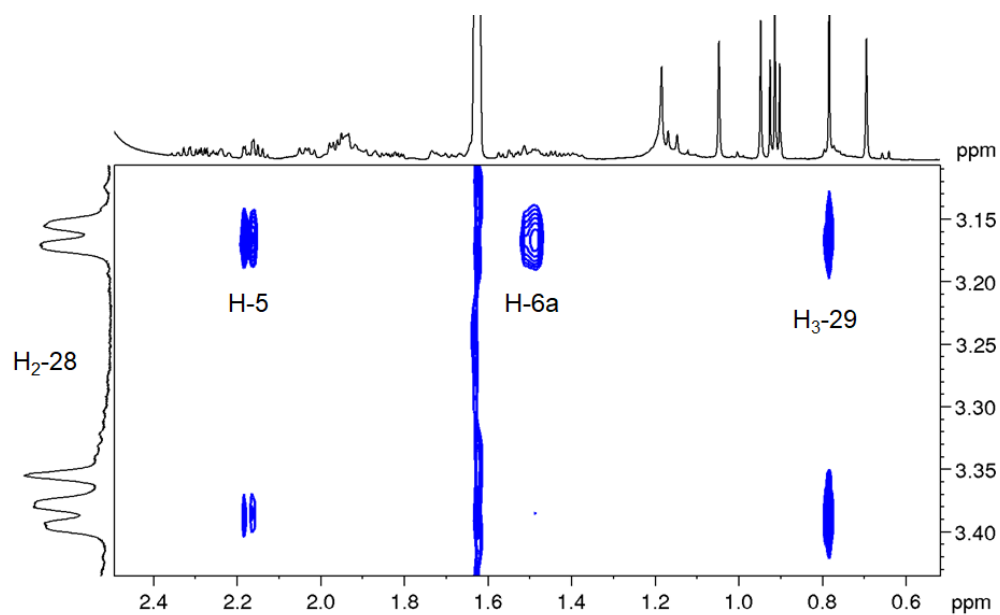

Figure S9. Selected region of the NOESY spectrum of compound **1** (600 MHz, THF-*d*<sub>8</sub>, 295 K)

## Spectra and spectral data on compound 2

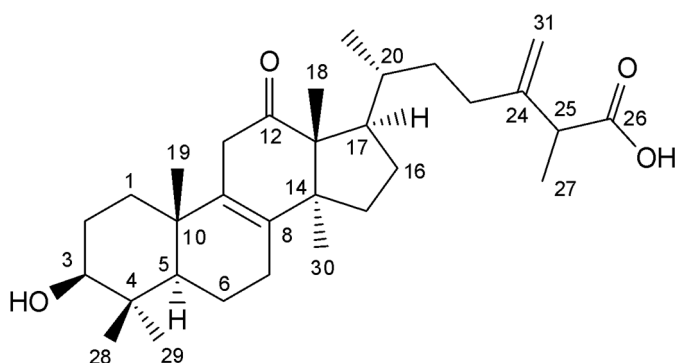

HR-ESI-MS (+)  $m/z$  485.3620  $[M + H]^+$  (485.3625 calcd. for  $C_{31}H_{49}O_4$ ;  $\Delta$  -1.0 ppm); HR-ESI-MSMS (CID = 15%, 30%, 45%) 468.9432, 454.8377

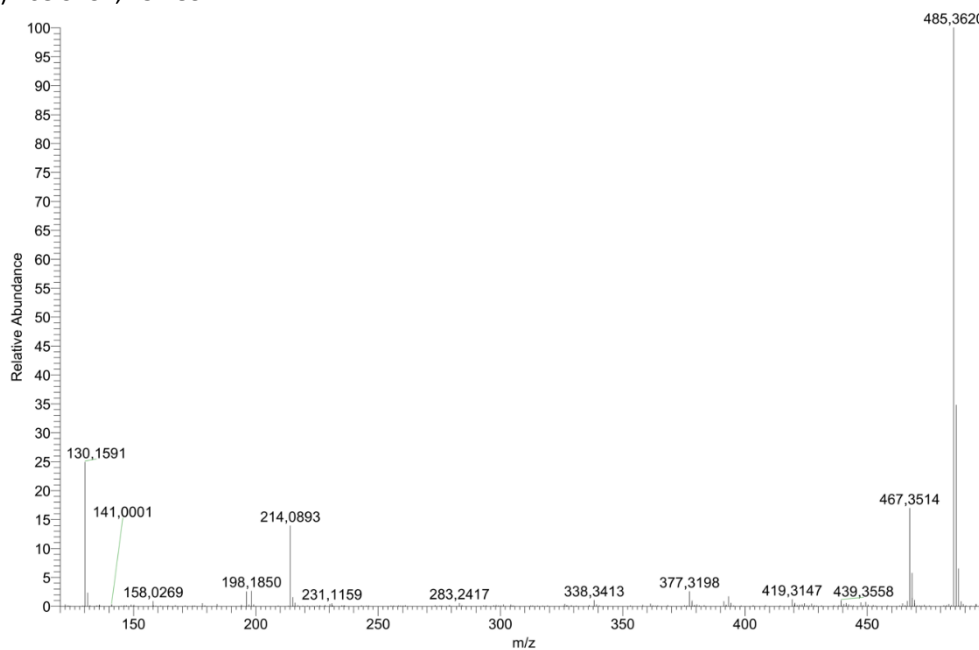

Figure S10. HR-ESI-MS spectrum of compound 2



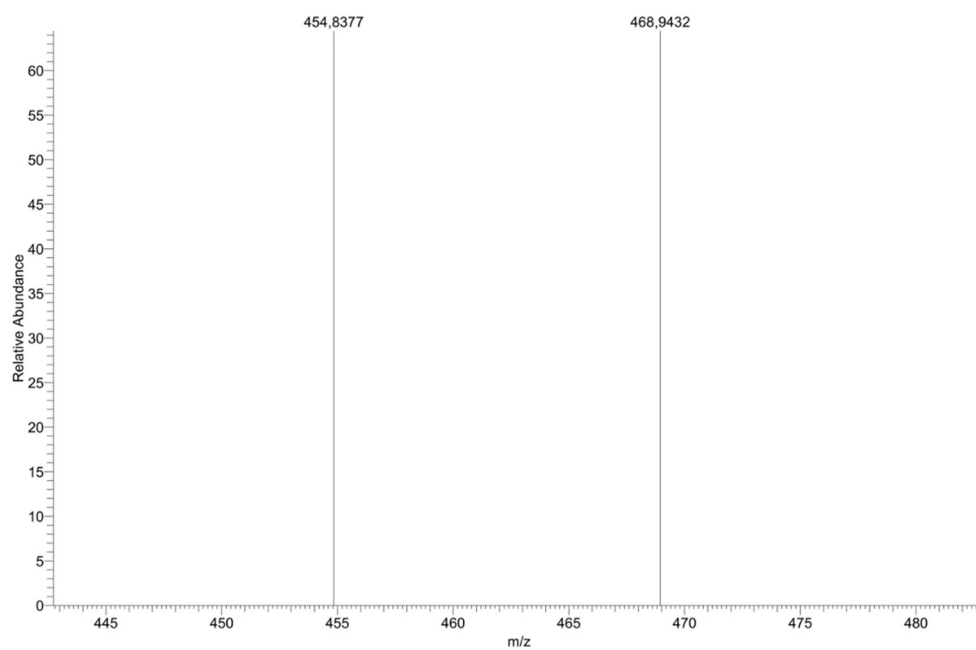

Figure S11. MS-MS spectrum of compound 2

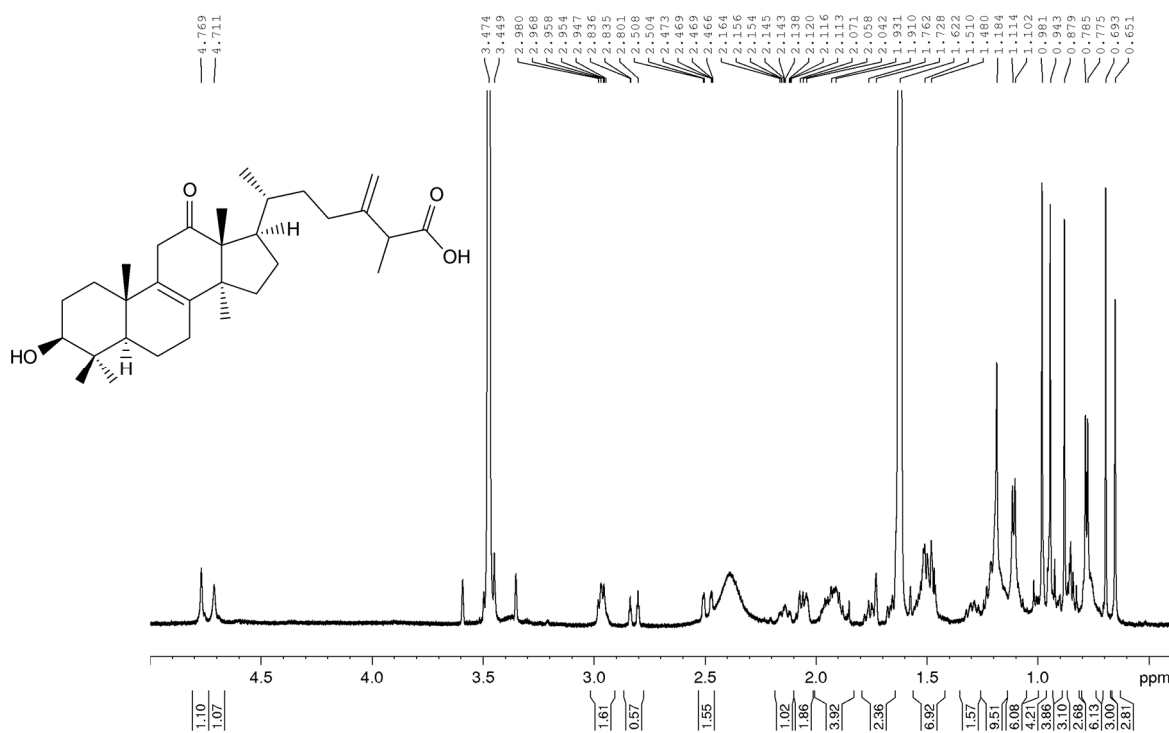

Figure S12. <sup>1</sup>H spectrum of compound 2 (600 MHz, THF-*d*<sub>8</sub>, 295 K)

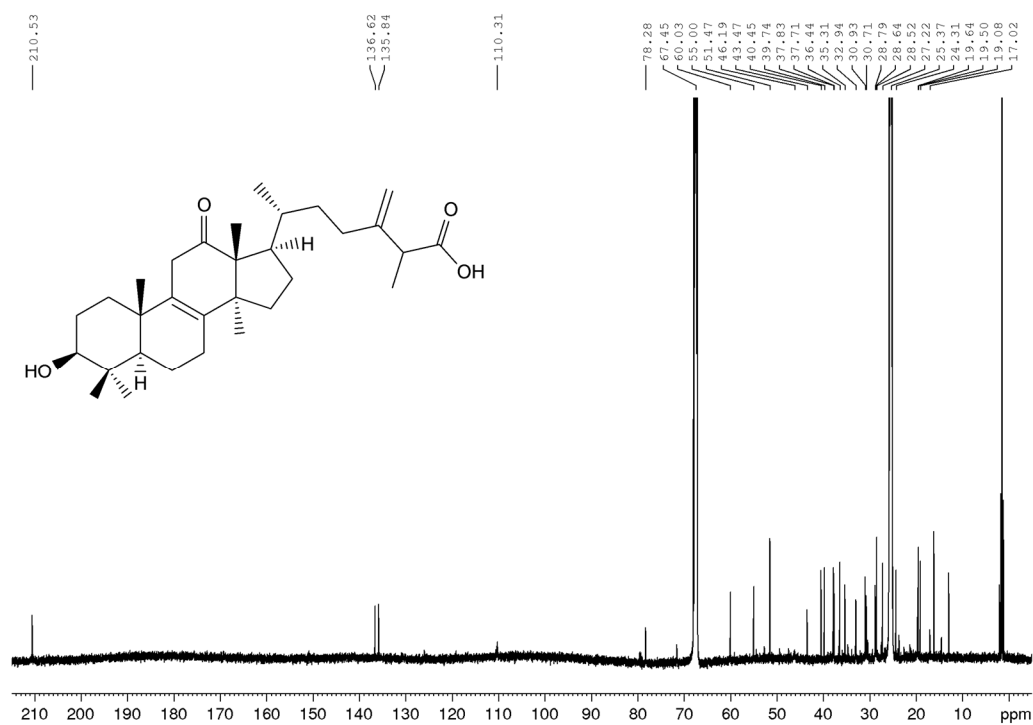

Figure S13.  $^{13}\text{C}$  spectrum of compound **2** (150 MHz,  $\text{THF}-d_8$ , 295 K)

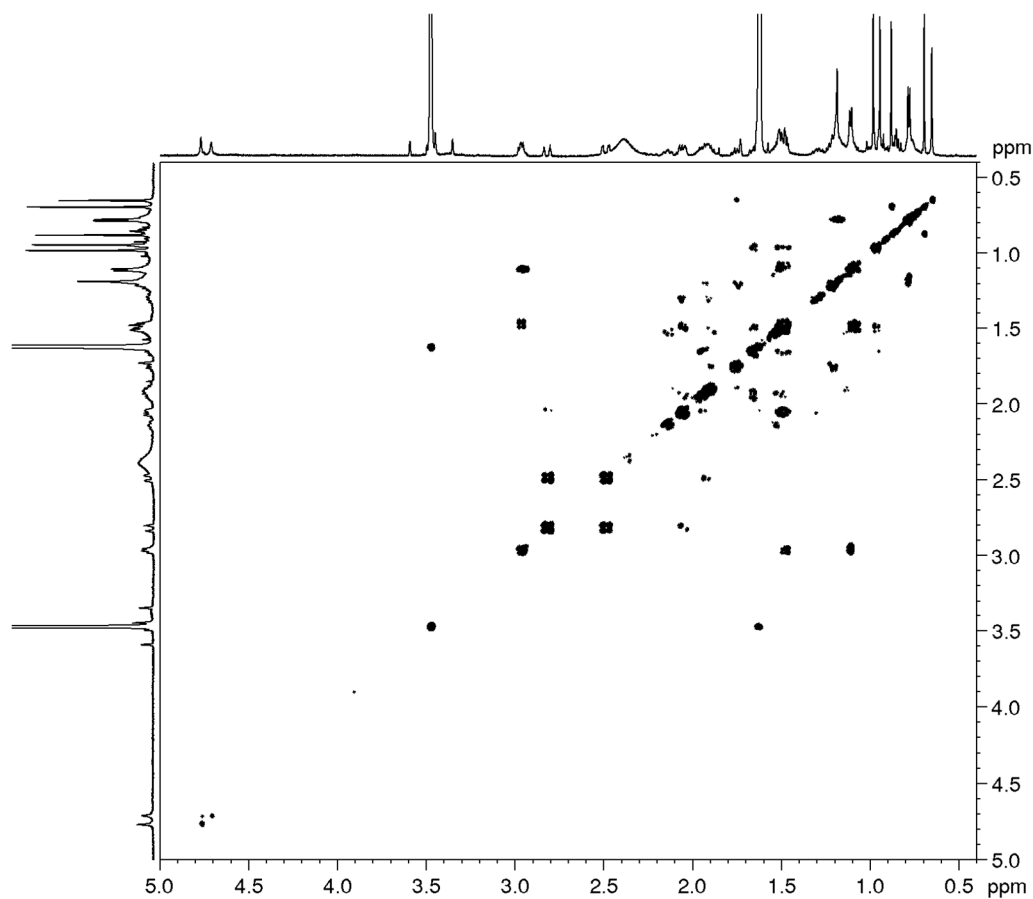

Figure S14. COSY spectrum of compound **2** (600 MHz,  $\text{THF}-d_8$ , 295 K)

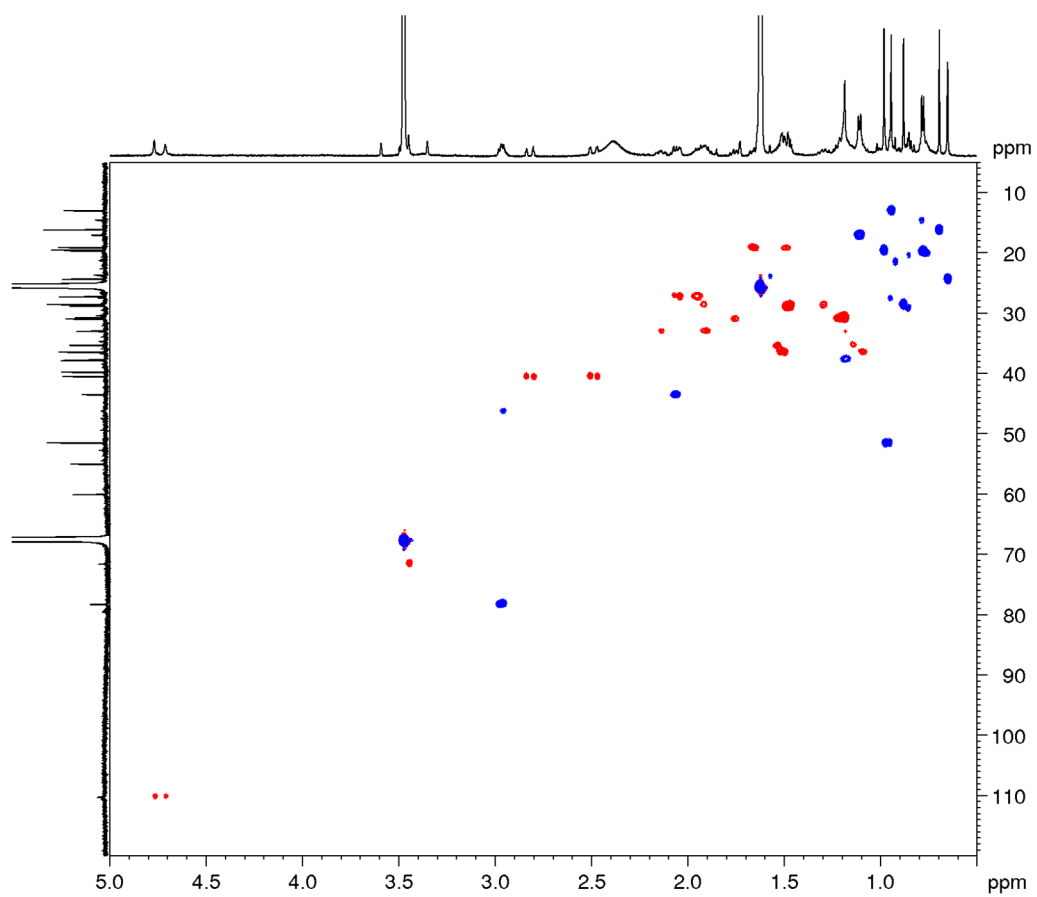

Figure S15. DEPT-edited HSQC spectrum of compound **2** (600 MHz, THF-*d*<sub>8</sub>, 295 K)

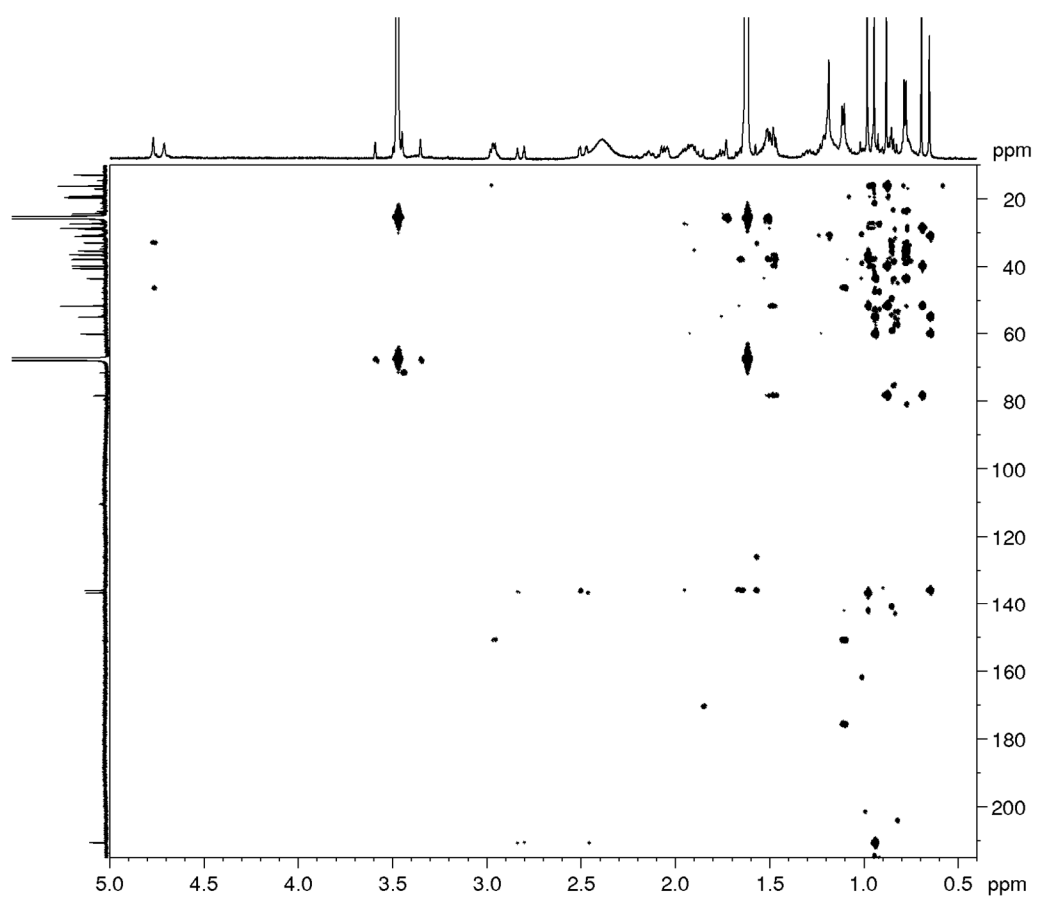

Figure S16. HMBC spectrum of compound **2** (600 MHz,  $\text{THF-}d_8$ , 295 K)

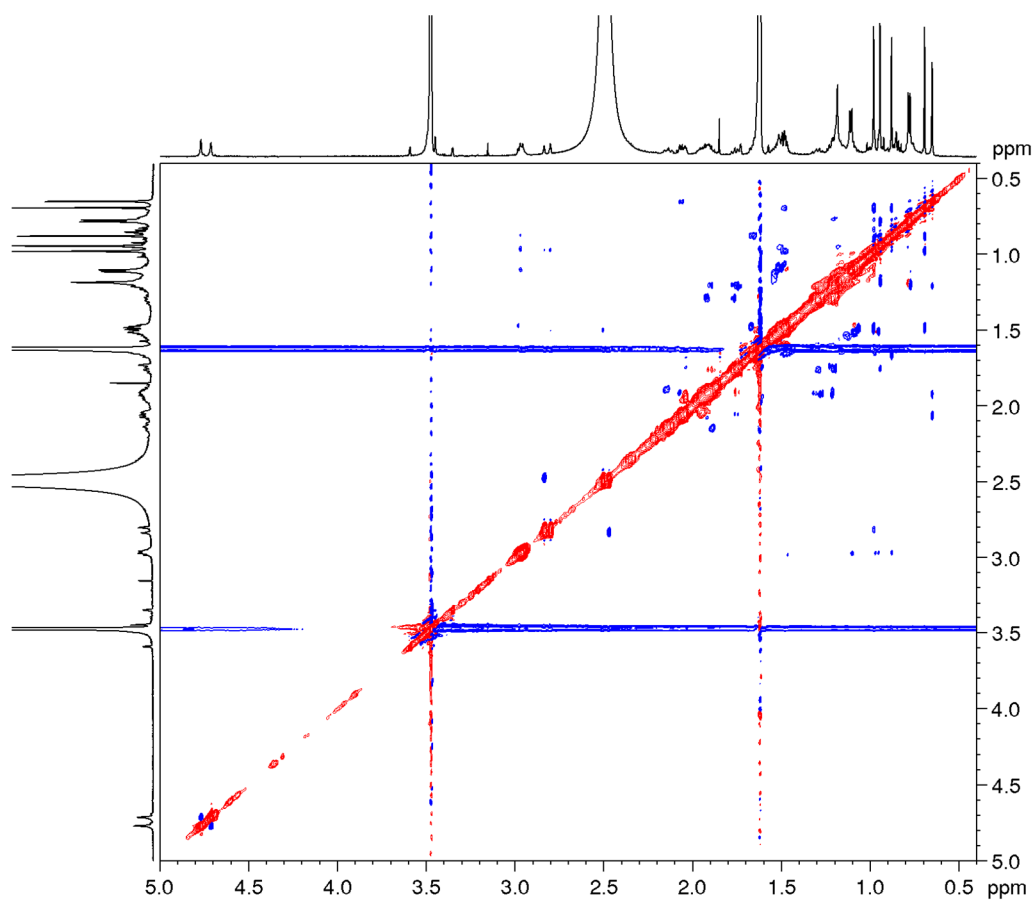

Figure S17. NOESY spectrum of compound **2** (600 MHz, THF- $d_8$ , 295 K)

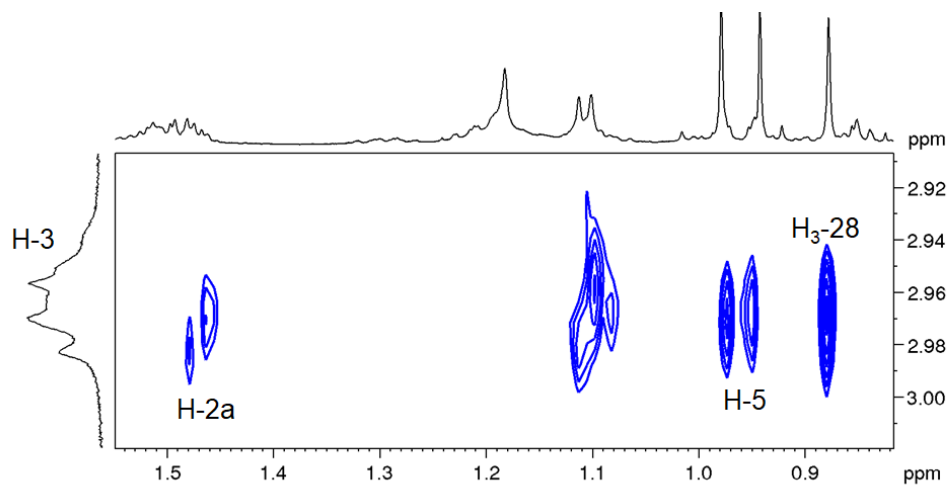

Figure S18. Selected region of the NOESY spectrum of compound **2** (600 MHz, THF- $d_8$ , 295 K)

### Spectra and spectral data on compound 3

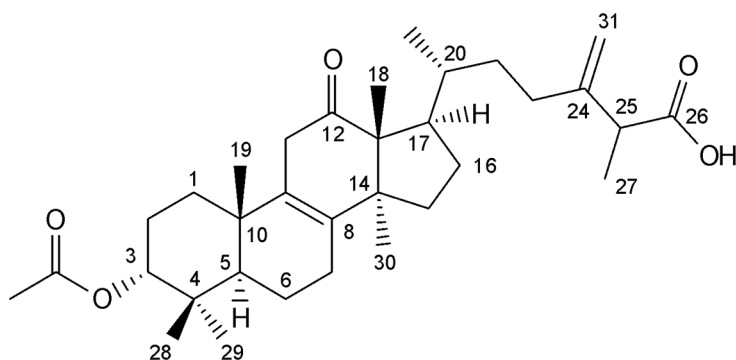

HR-ESI-MS (+)  $m/z$  527.3721  $[M + H]^+$  (527.3731 calcd. for  $C_{33}H_{51}O_5$ ;  $\Delta$  -2.0 ppm); HR-ESI-MSMS (CID = 15%, 30%, 45%) 509.3611, 481.3671, 467.3504, 449.3400, 421.3456

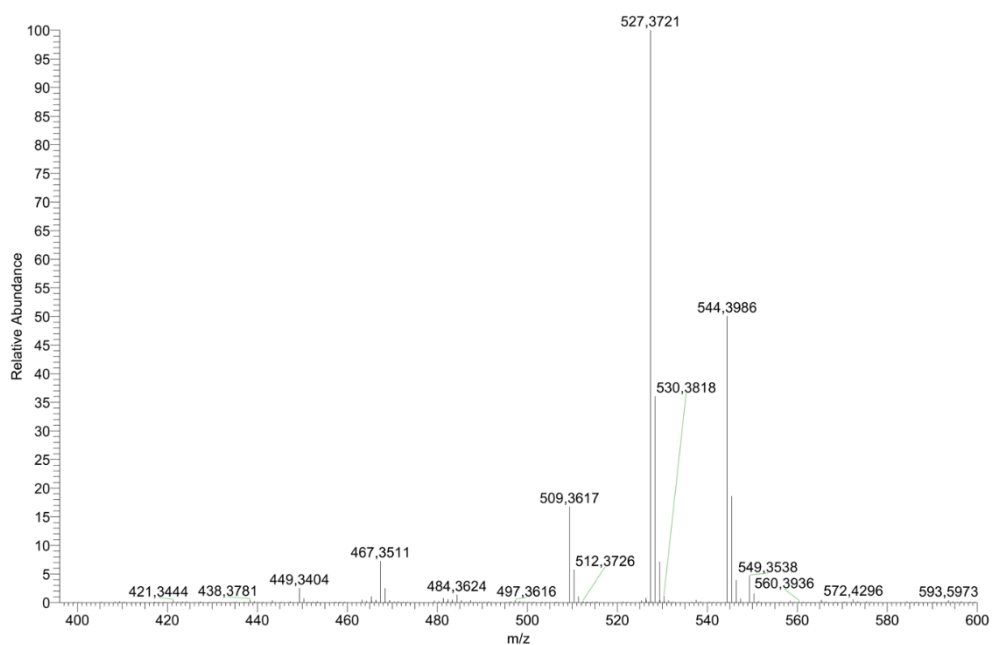

Figure S19. HR-ESI-MS spectrum of compound 3

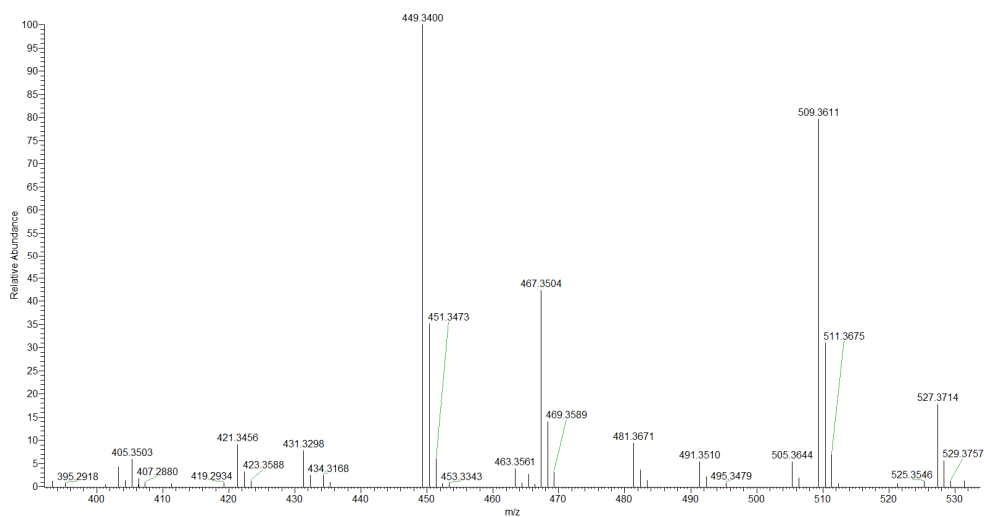

Figure S20. MS-MS spectrum of compound 3

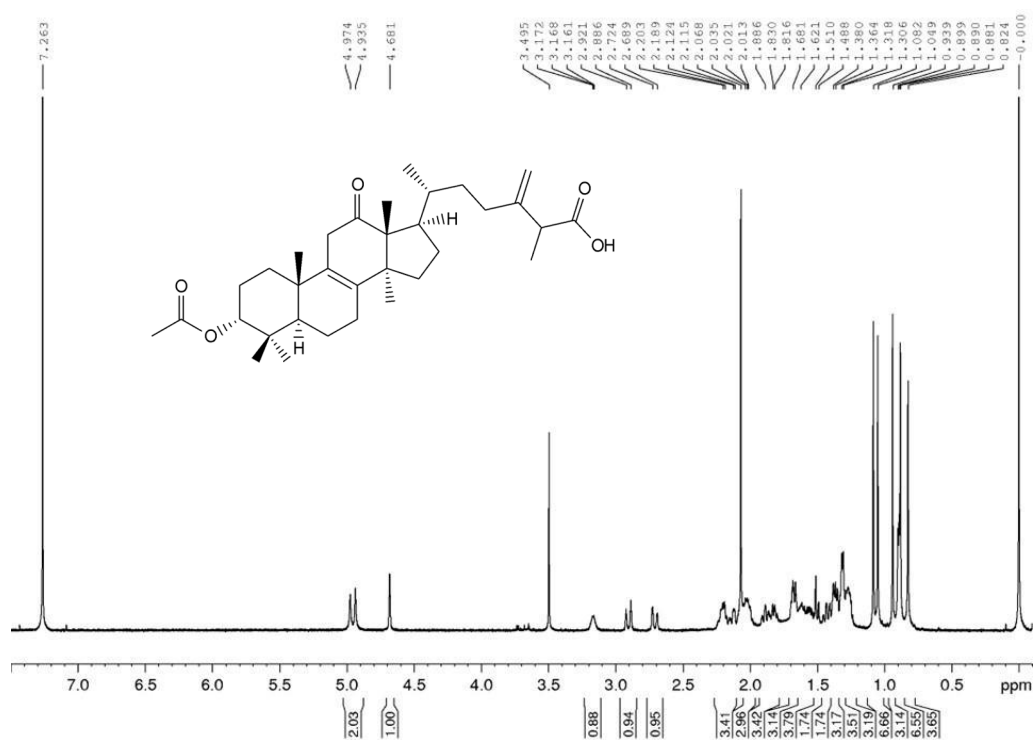

Figure S21. <sup>1</sup>H spectrum of compound 3 (600 MHz, CDCl<sub>3</sub>, 295 K)

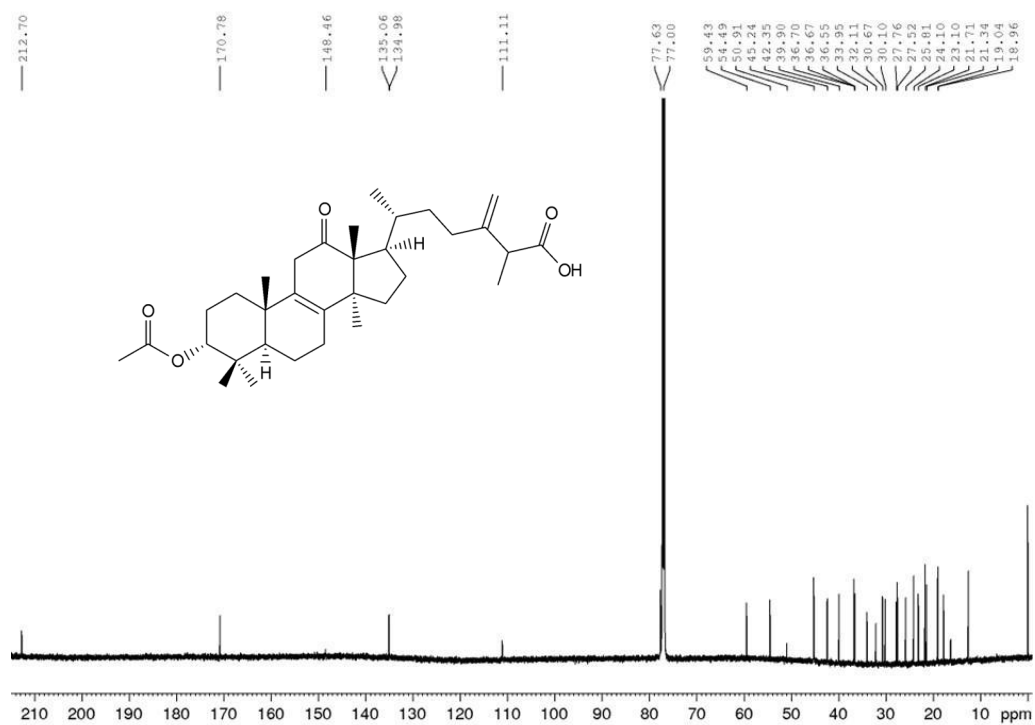

Figure S22.  $^{13}\text{C}$  spectrum of compound **3** (150 MHz,  $\text{CDCl}_3$ , 295 K)

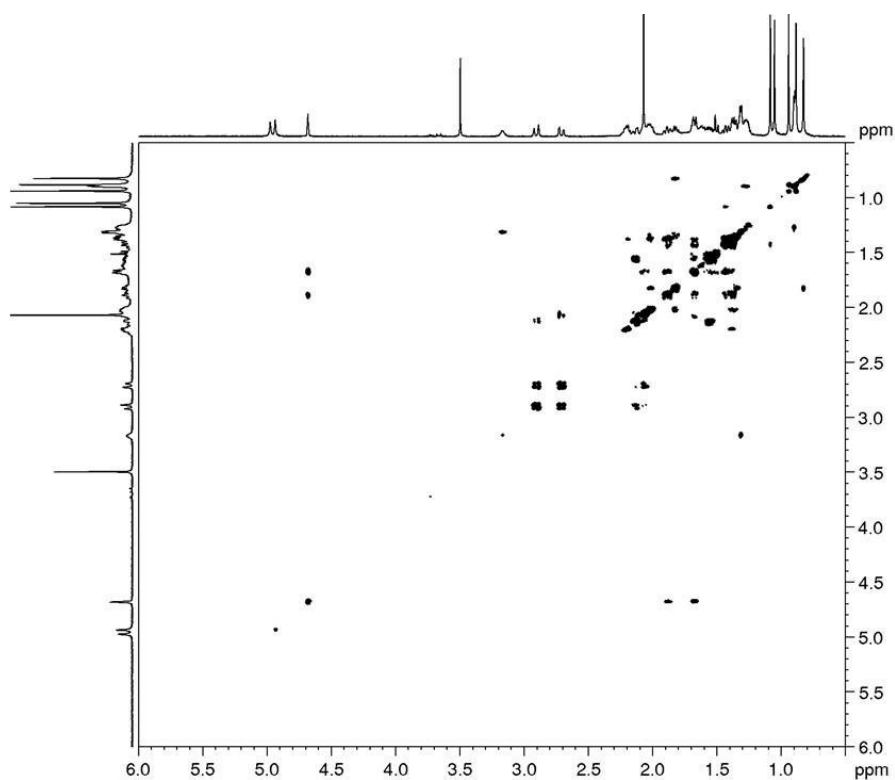

Figure S23. COSY spectrum of compound **3** (600 MHz,  $\text{CDCl}_3$ , 295 K)



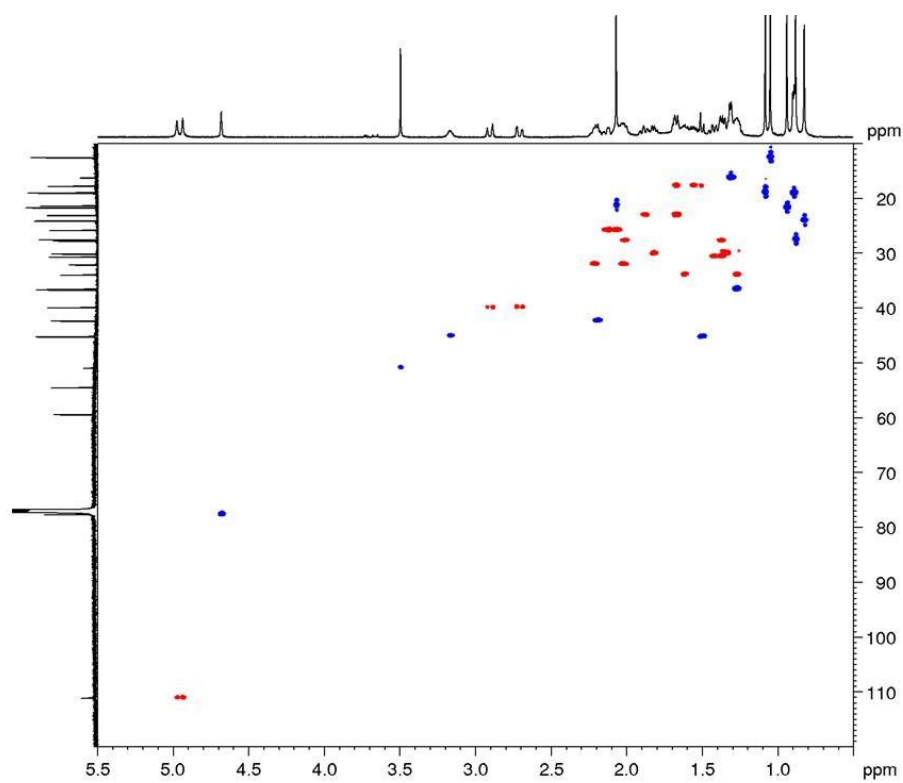

Figure S24. DEPT-edited HSQC spectrum of compound **3** (600 MHz, CDCl<sub>3</sub>, 295 K)

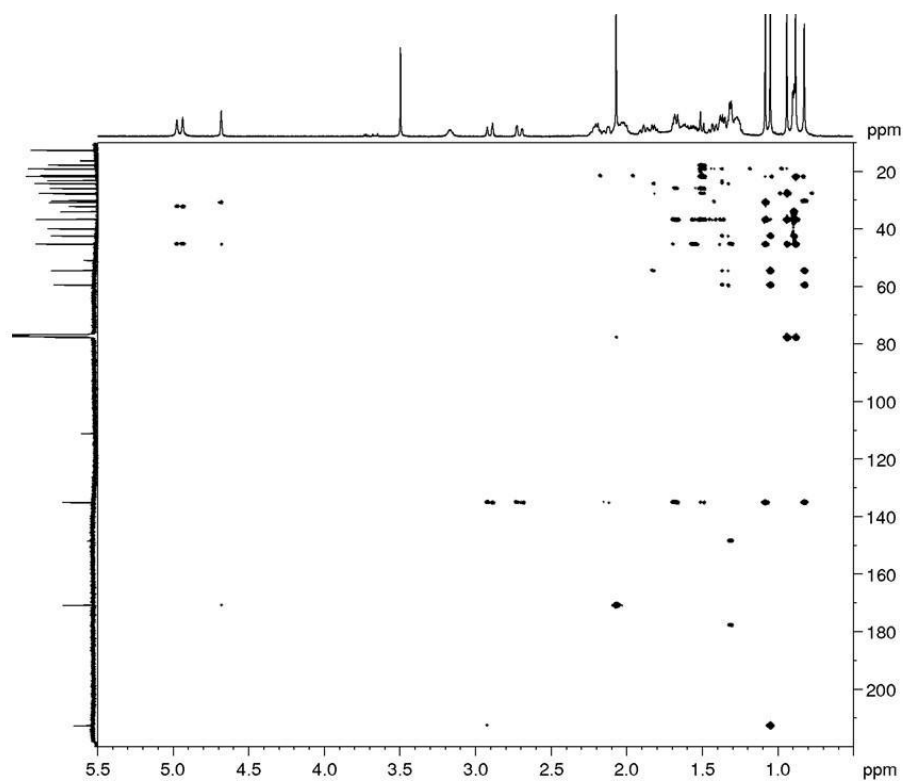

Figure S25. HMBC spectrum of compound **3** (600 MHz, CDCl<sub>3</sub>, 295 K)

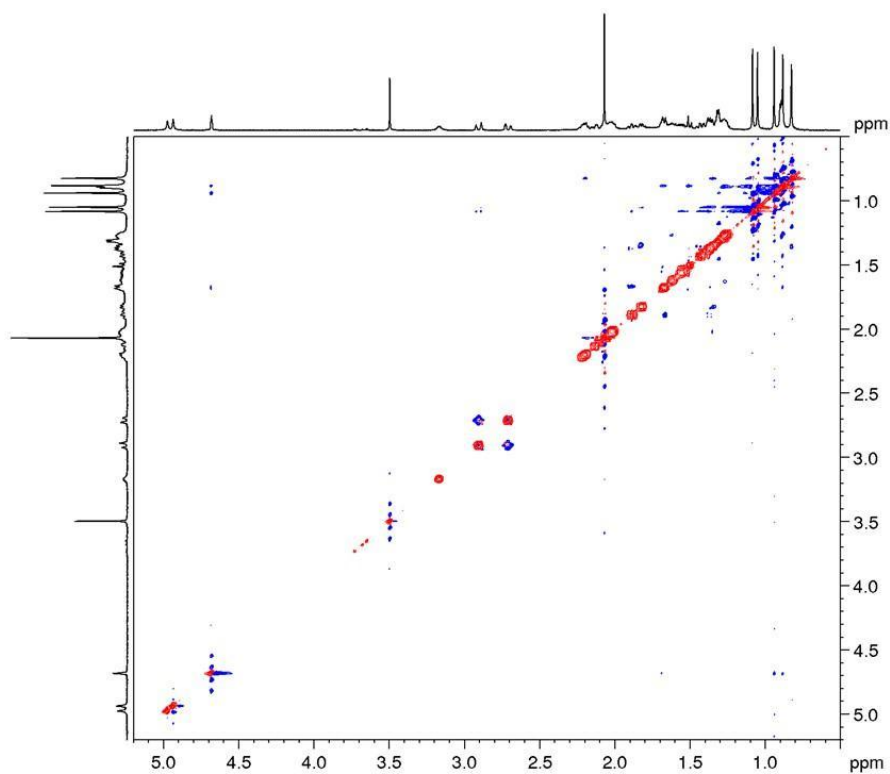

Figure S26. NOESY spectrum of compound **3** (600 MHz, CDCl<sub>3</sub>, 295 K)

#### Spectra and spectral data on compound **4**

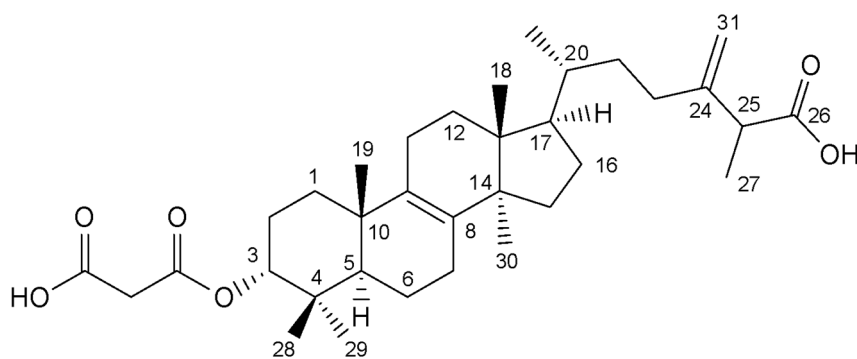

HR-ESI-MS (-)  $m/z$  555.3694 [ $M - H$ ]<sup>-</sup> (555.3680 calcd. for C<sub>34</sub>H<sub>51</sub>O<sub>6</sub>;  $\Delta$  2.6 ppm); HR-ESI-MSMS (CID = 15%, 30%, 45%)  $m/z$  511.3787

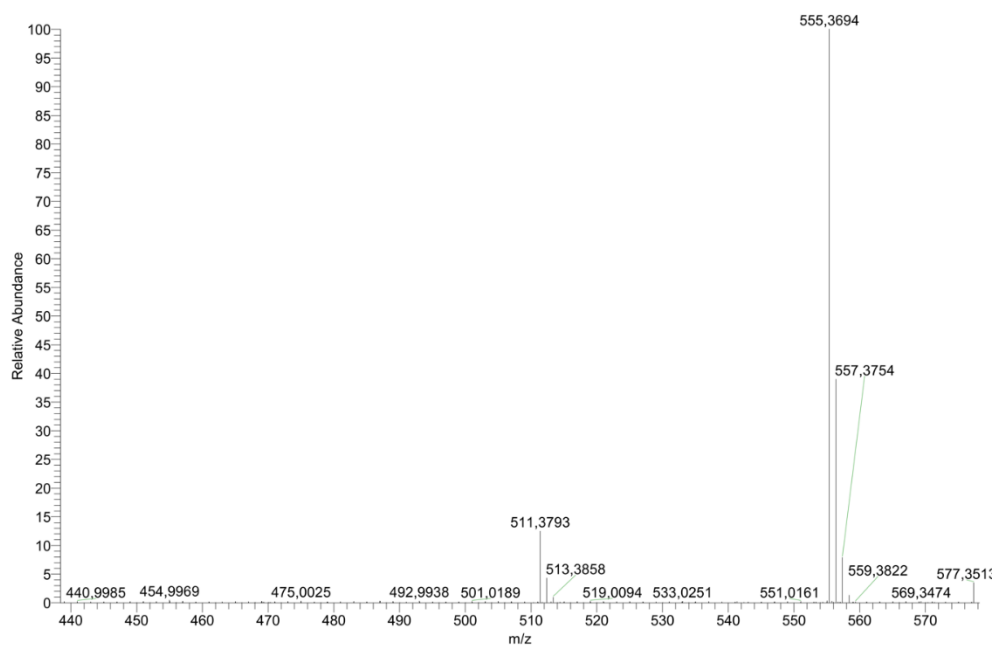

Figure S27. HR-ESI-MS spectrum of compound 4

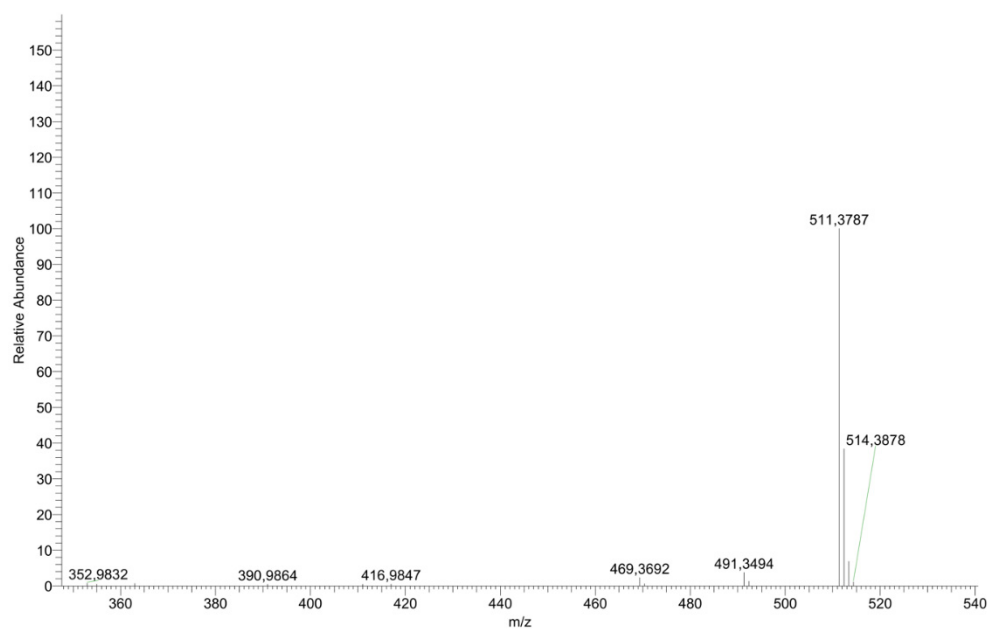

Figure S28. MS-MS spectrum of compound 4

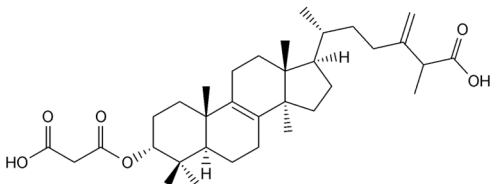

Chemical structure of compound 1 is shown above the spectrum. The structure is a complex steroid derivative with a carboxylic acid group and a methyl group. The spectrum displays peaks corresponding to the carbon atoms in the molecule, with the following chemical shifts (ppm) labeled above the peaks:

- 179.64
- 167.24
- 149.31
- 134.34
- 134.23
- 111.38
- 80.63
- 77.00
- 50.27
- 49.85
- 45.29
- 45.01
- 44.45
- 40.67
- 36.80
- 36.75
- 36.29
- 34.40
- 33.65
- 30.94
- 30.78
- 30.64
- 28.19
- 27.63
- 25.94
- 24.24
- 23.16
- 21.71
- 18.32
- 18.22
- 18.63
- 17.97

24

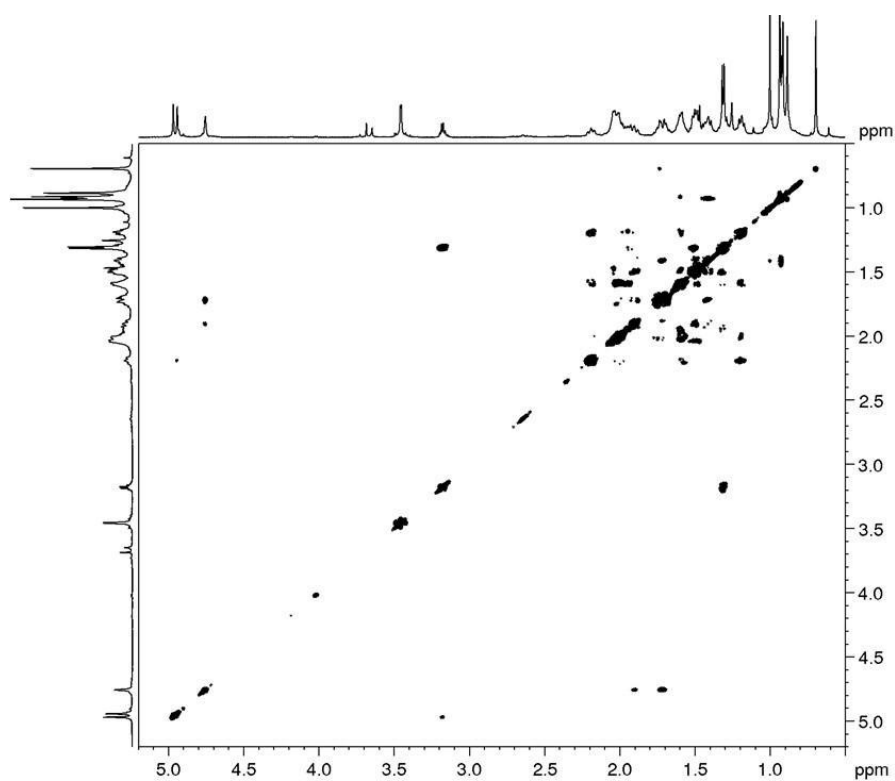

Figure S31. COSY spectrum of compound **4** (600 MHz, CDCl<sub>3</sub>, 295 K)

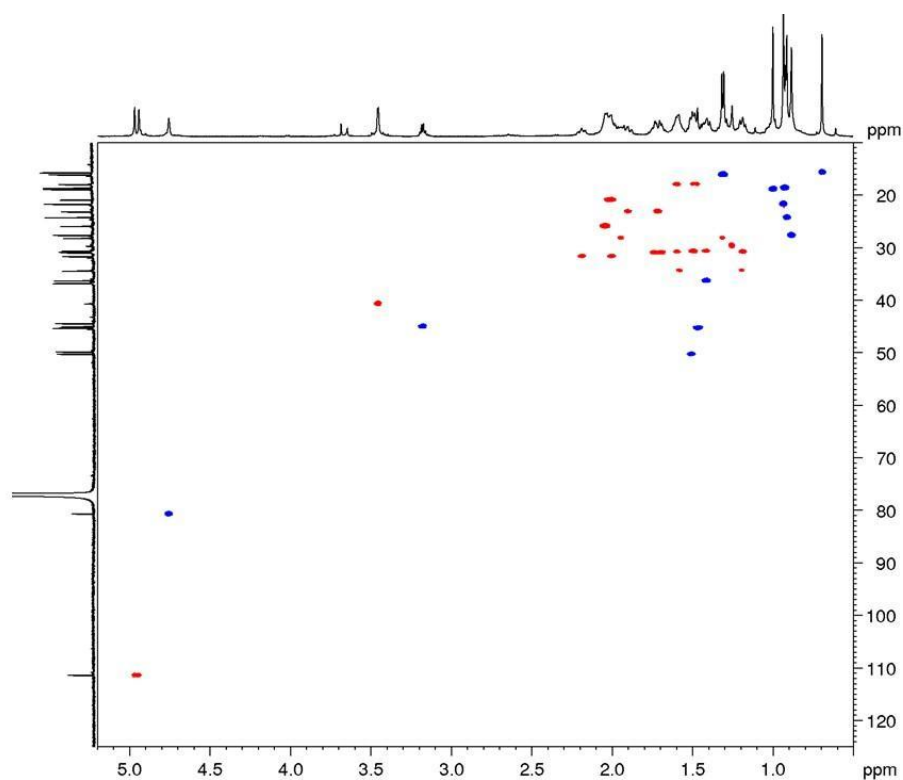

Figure S32. DEPT-edited HSQC spectrum of compound **4** (600 MHz, CDCl<sub>3</sub>, 295 K)

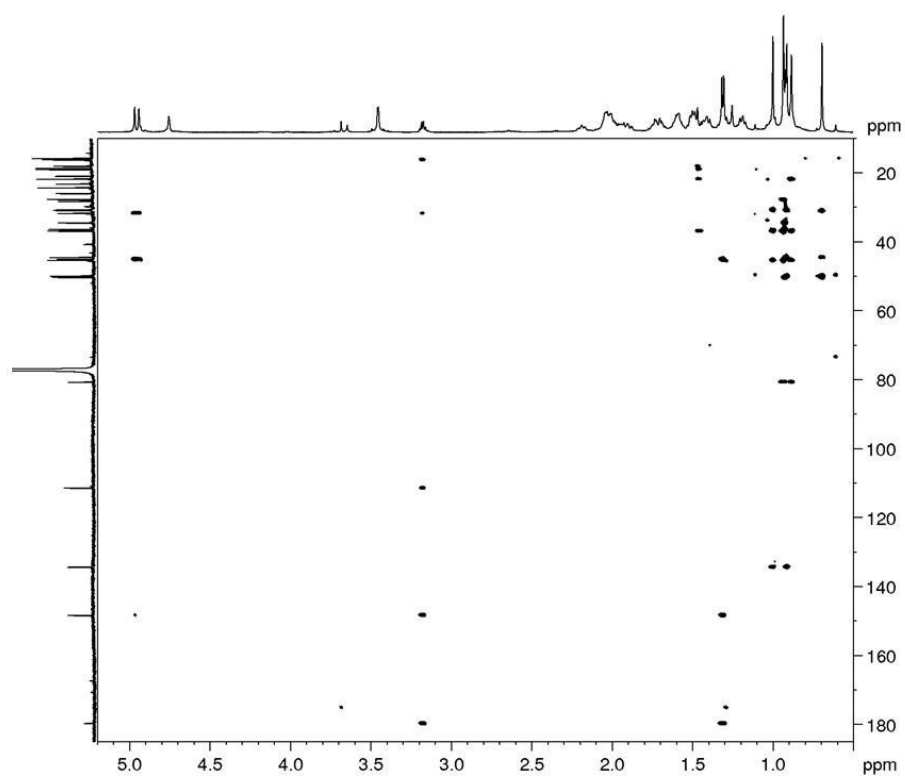

Figure S33. HMBC spectrum of compound **4** (600 MHz,  $\text{CDCl}_3$ , 295 K)

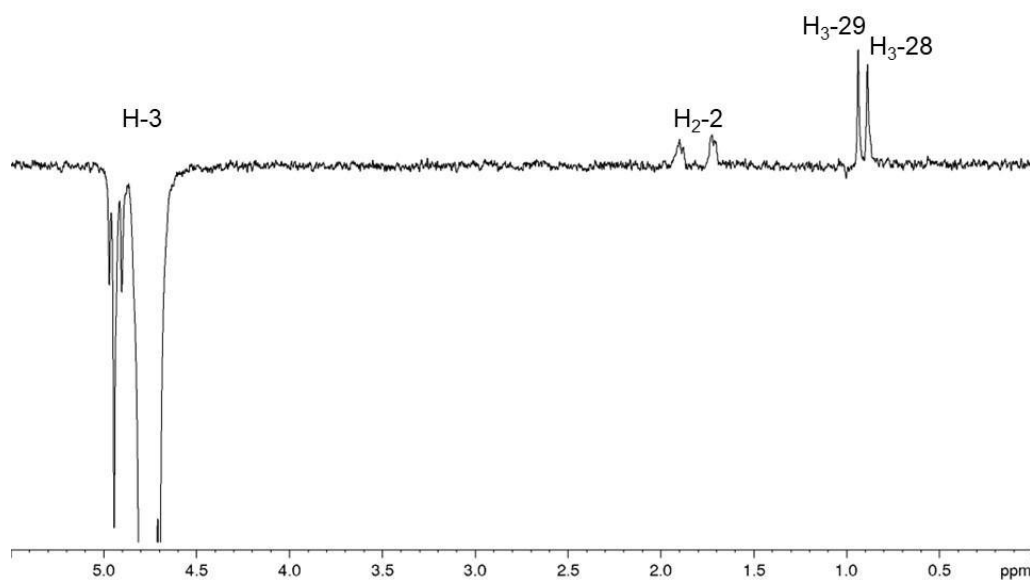

Figure S34. Selective gradient NOESY spectrum of compound **4** (600 MHz,  $\text{CDCl}_3$ , 295 K)

## Spectra and spectral data on compound 5

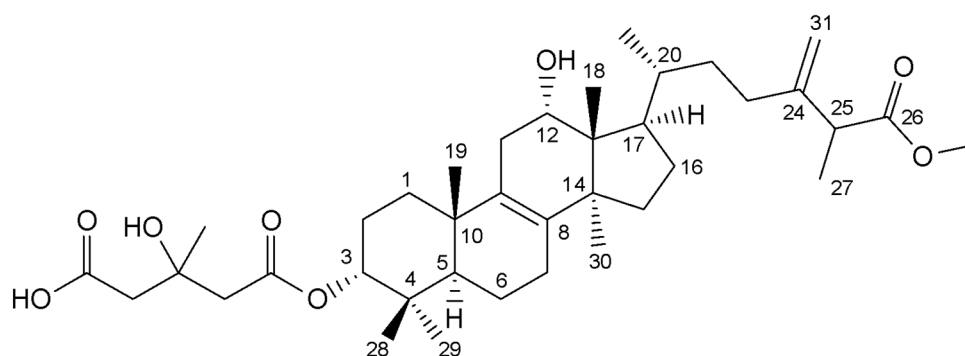

HR-ESI-MS (+)  $m/z$  645.4343  $[M + H]^+$  (645.4361 calcd. for  $C_{38}H_{61}O_8$ ;  $\Delta$  2.8 ppm); HR-ESI-MSMS (CID = 15%, 30%, 45%) 627.4243, 465.3715

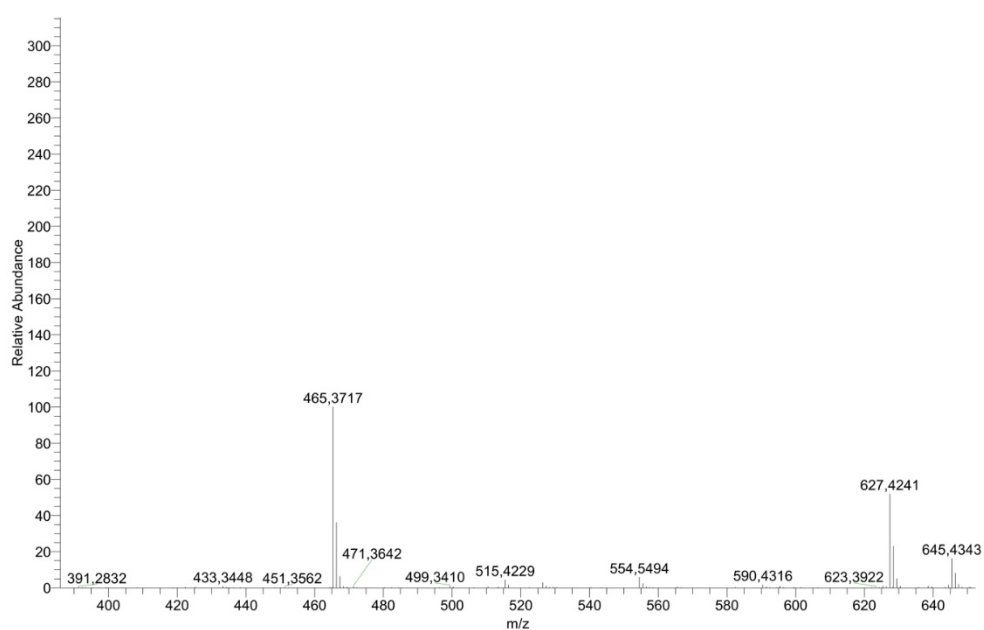

Figure S35. HR-ESI-MS spectrum of compound 5

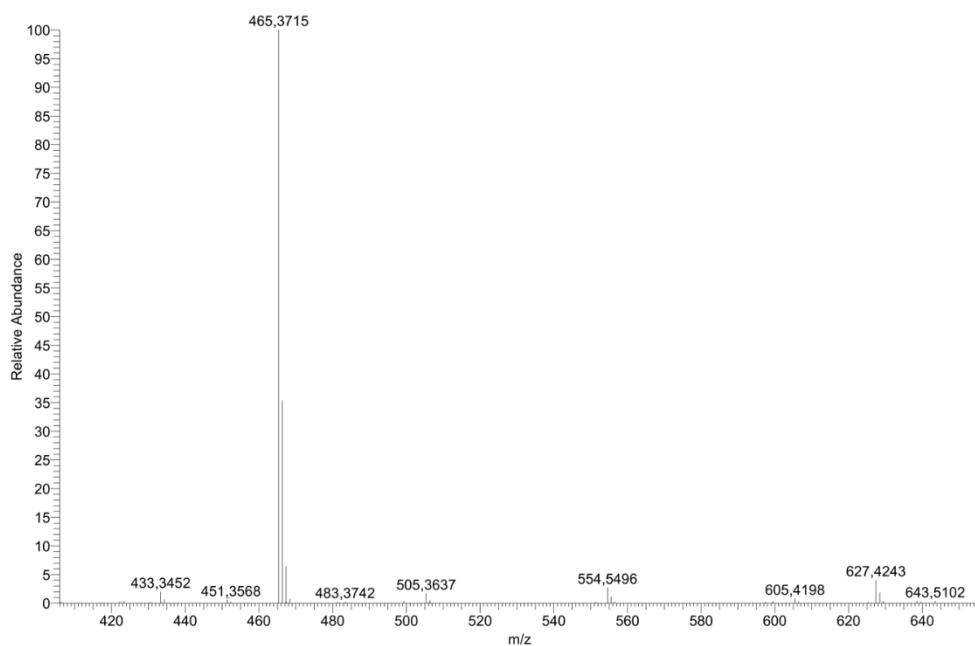

Figure S36. MS-MS spectrum of compound 5

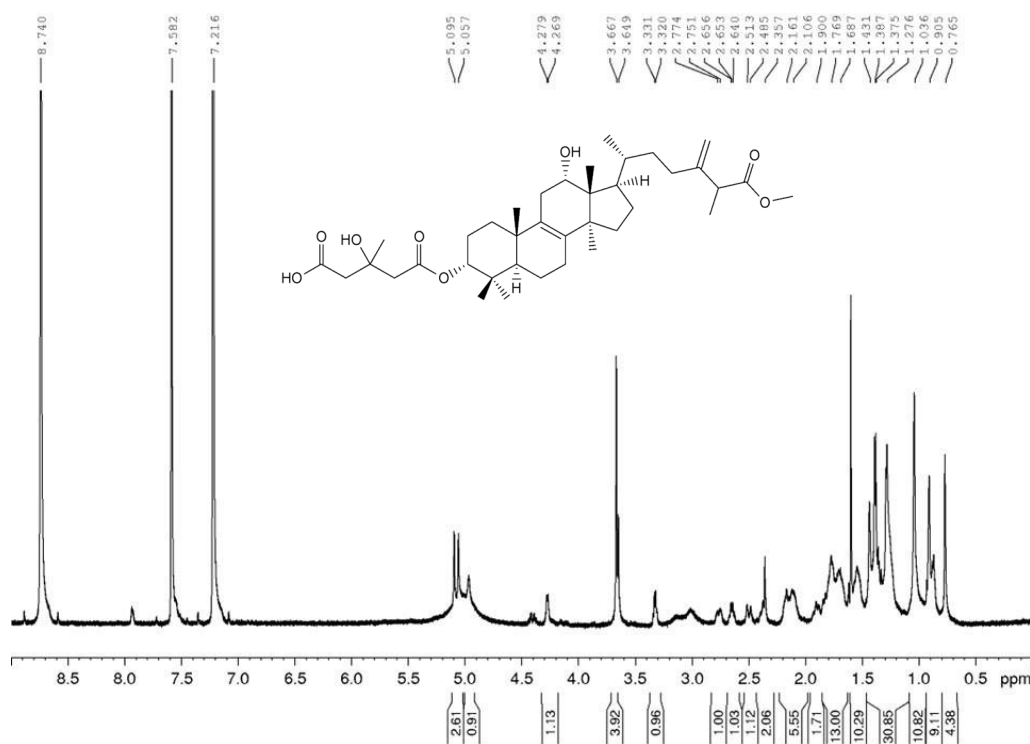

Figure S37. <sup>1</sup>H spectrum of compound 5 (600 MHz, pyridine-d<sub>5</sub>, 295 K)



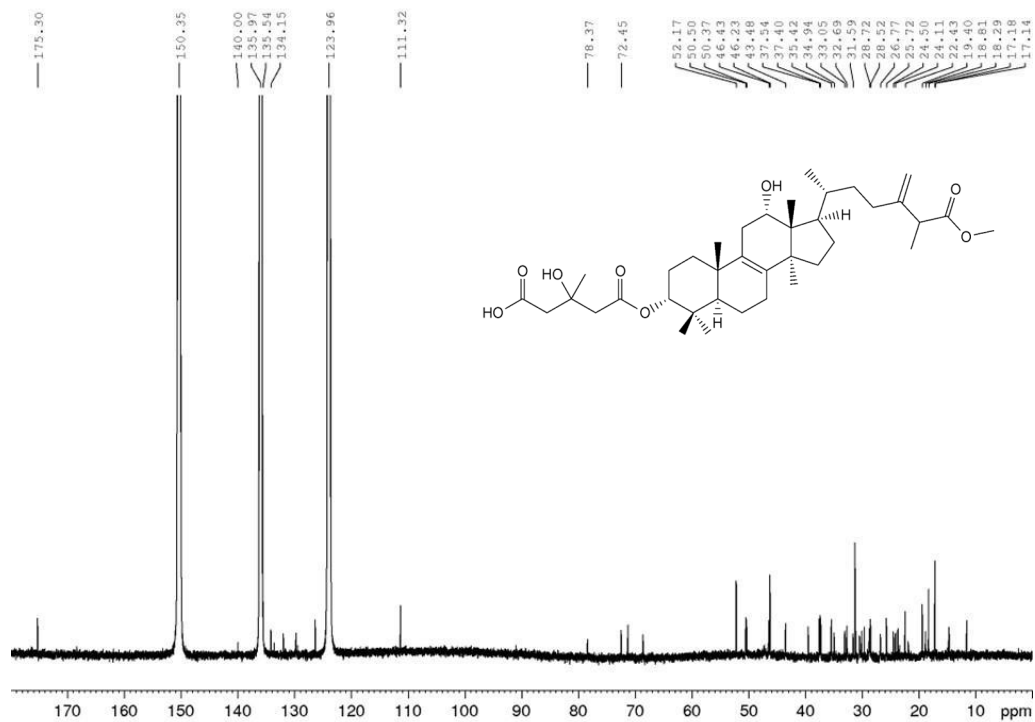

Figure S38.  $^{13}\text{C}$  spectrum of compound **5** (150 MHz, pyridine- $d_5$ , 295 K)

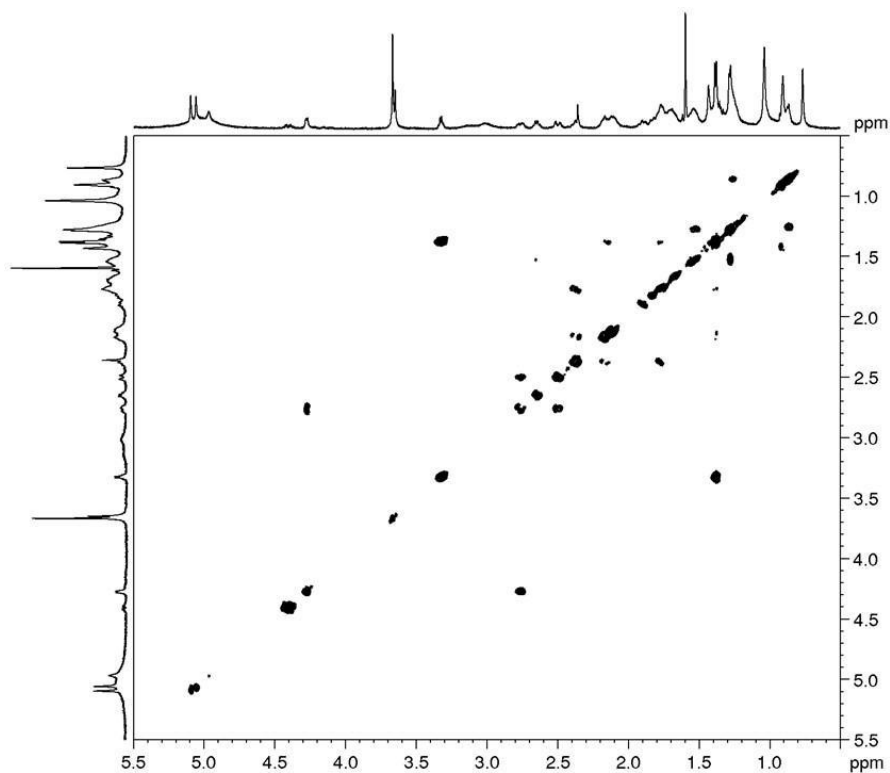

Figure S39. COSY spectrum of compound **5** (600 MHz, pyridine- $d_5$ , 295 K)

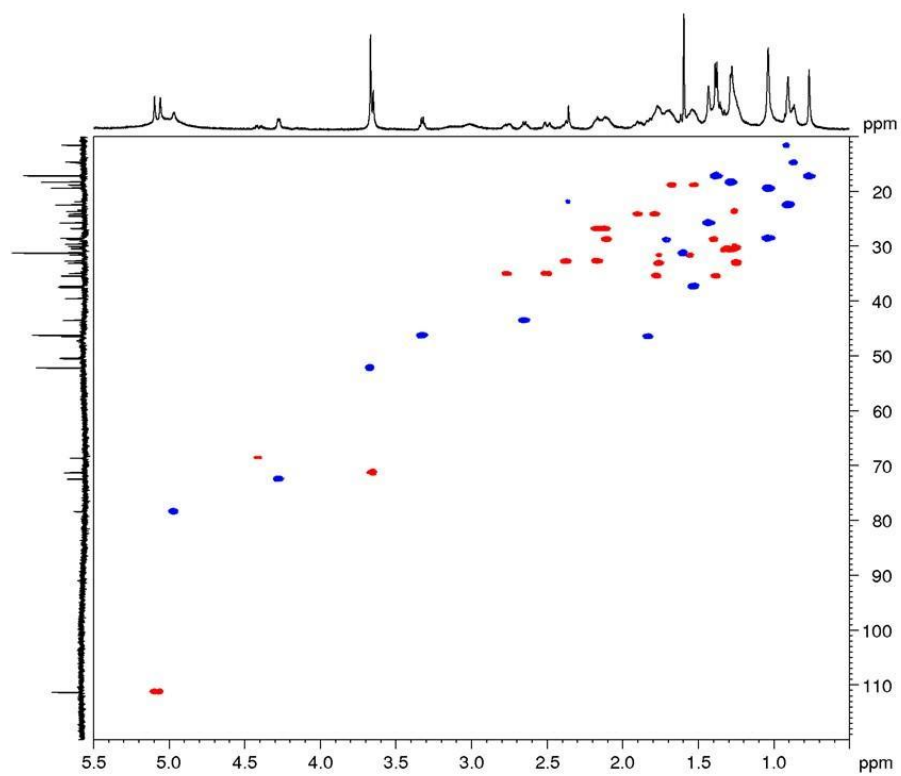

Figure S40. DEPT-edited HSQC spectrum of compound **5** (600 MHz, pyridine-*d*<sub>5</sub>, 295 K)

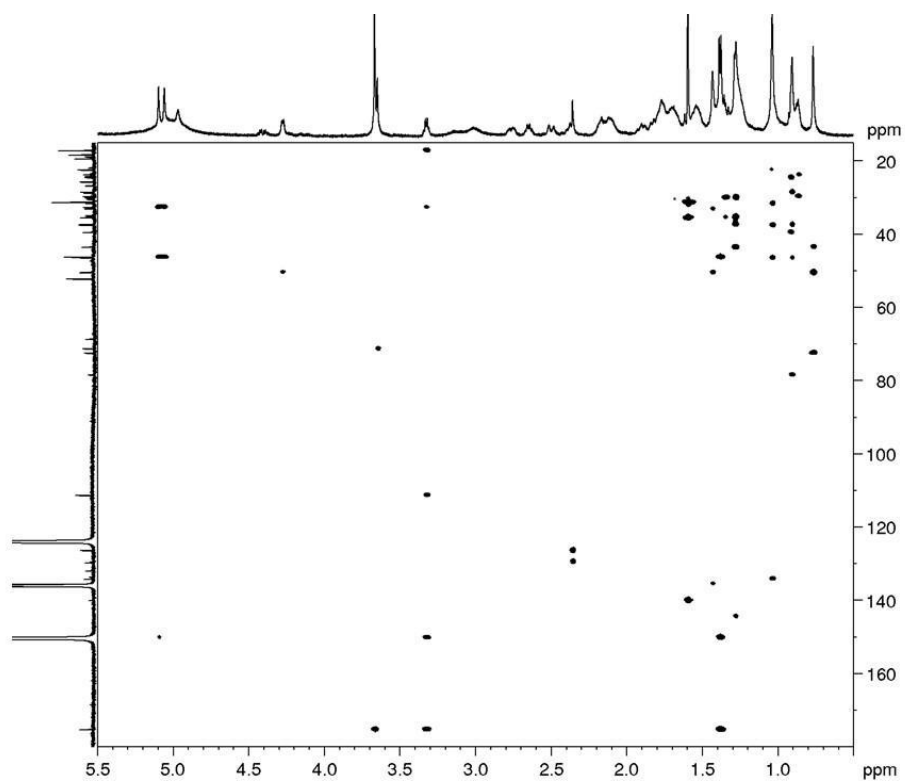

Figure S41. HMBC spectrum of compound **5** (600 MHz, pyridine-*d*<sub>5</sub>, 295 K)

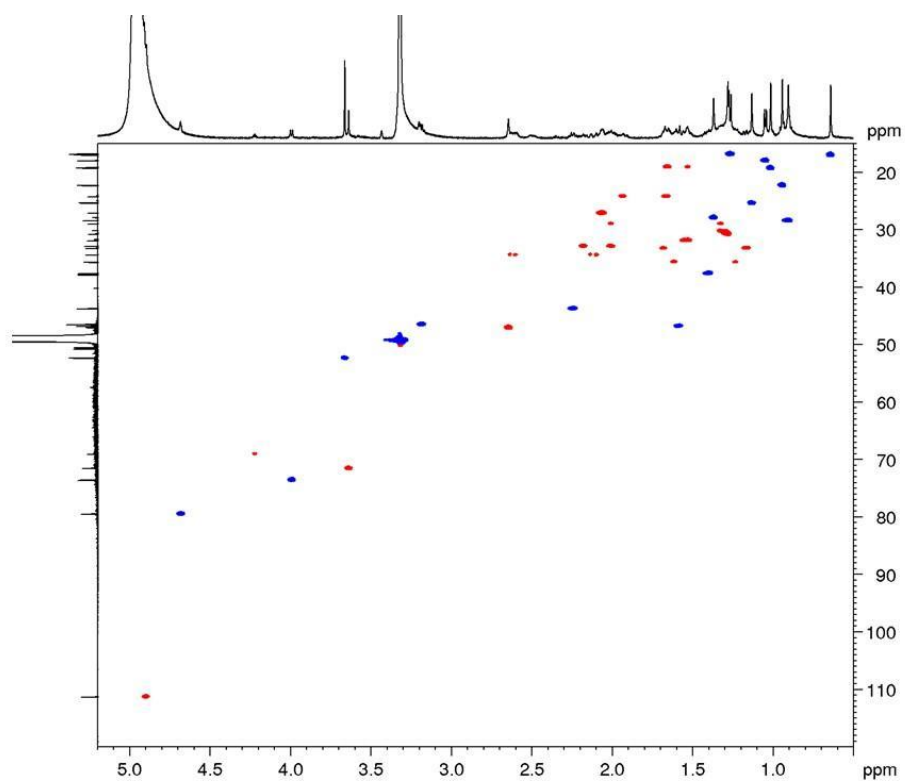

Figure S42. DEPT-edited HSQC spectrum of compound **5** (600 MHz, CD<sub>3</sub>OD:pyridine-*d*<sub>5</sub> (19:1), 295 K)

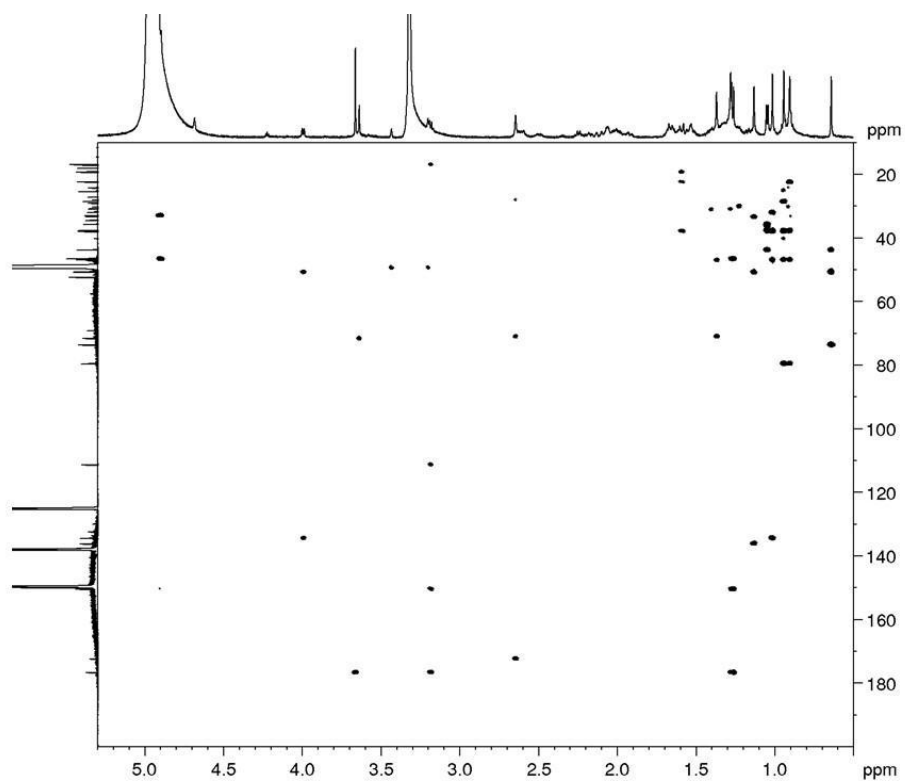

Figure S43. HMBC spectrum of compound **5** (600 MHz, CD<sub>3</sub>OD: pyridine-*d*<sub>5</sub> (19:1), 295 K)

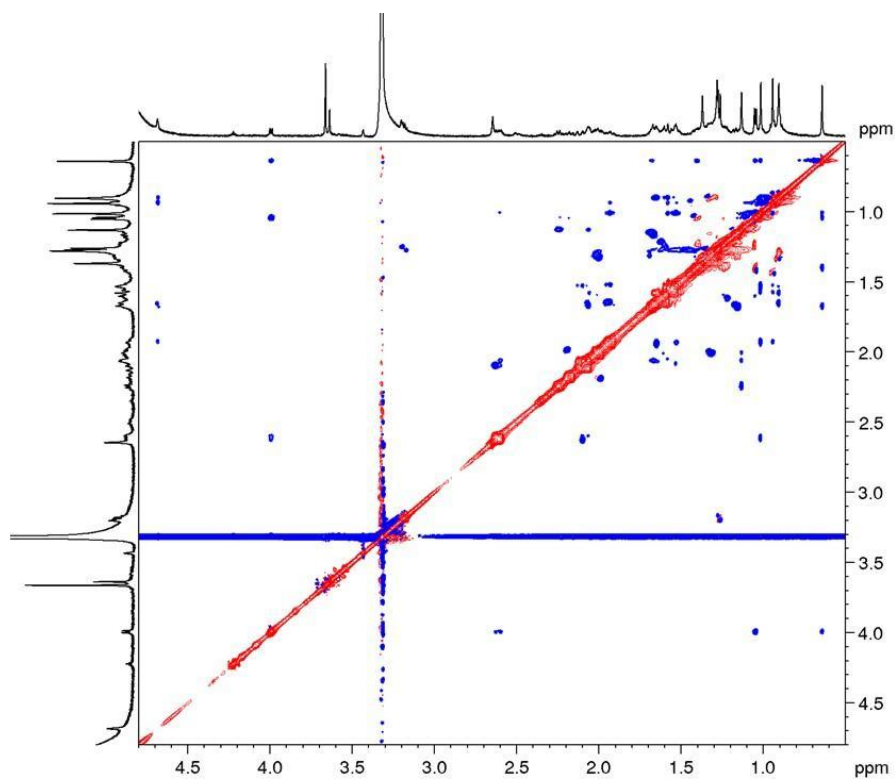

Figure S44. ROESY spectrum of compound **5** (600 MHz, CD<sub>3</sub>OD:pyridine-*d*<sub>5</sub> (19:1), 295 K)

#### Spectra and spectral data on compound **6**

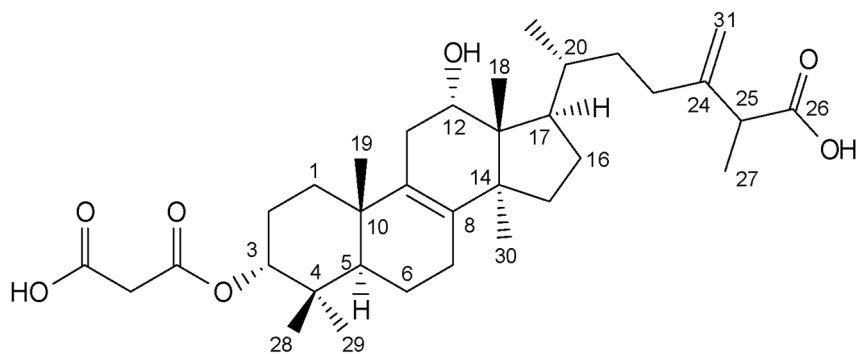

HR-ESI-MS (-)  $m/z$  571.3642 [ $M - H$ ]<sup>-</sup> (571.3629 calcd. for C<sub>34</sub>H<sub>51</sub>O<sub>7</sub>;  $\Delta$  2.2 ppm;); HR-ESI-MSMS (CID = 15%, 30%, 45%) 527.3740, 483.3840, 441.3737

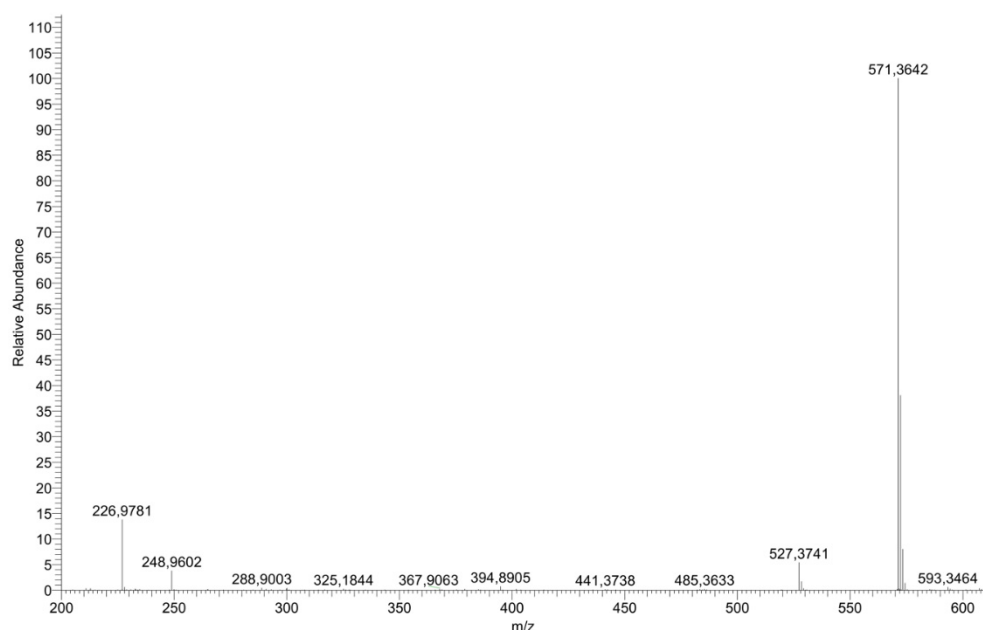

Figure S45. HR-ESI-MS spectrum of compound 6

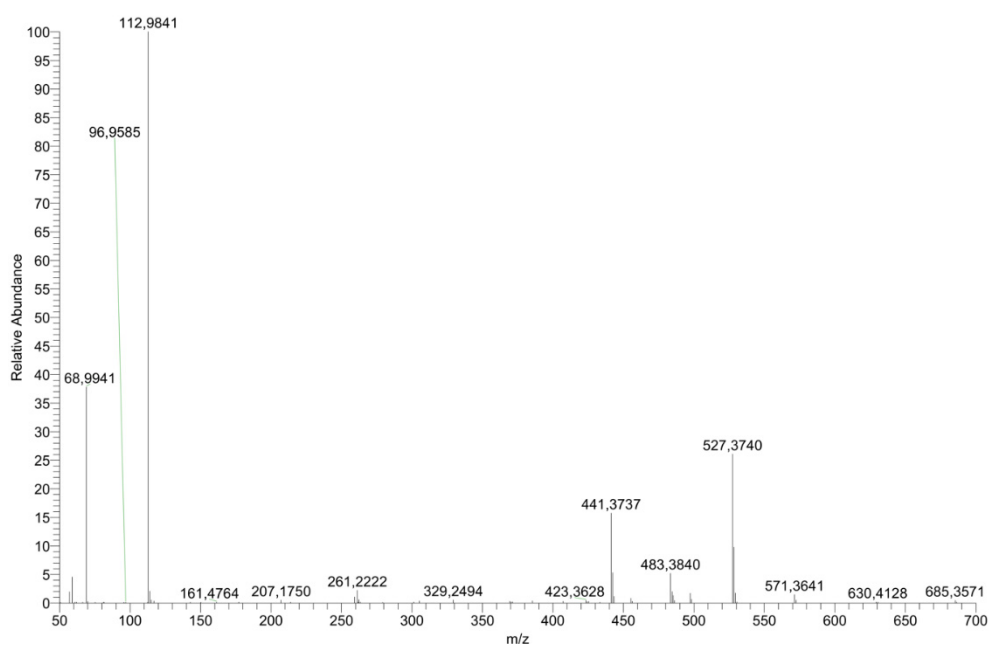

Figure S46. MS-MS spectrum of compound 6

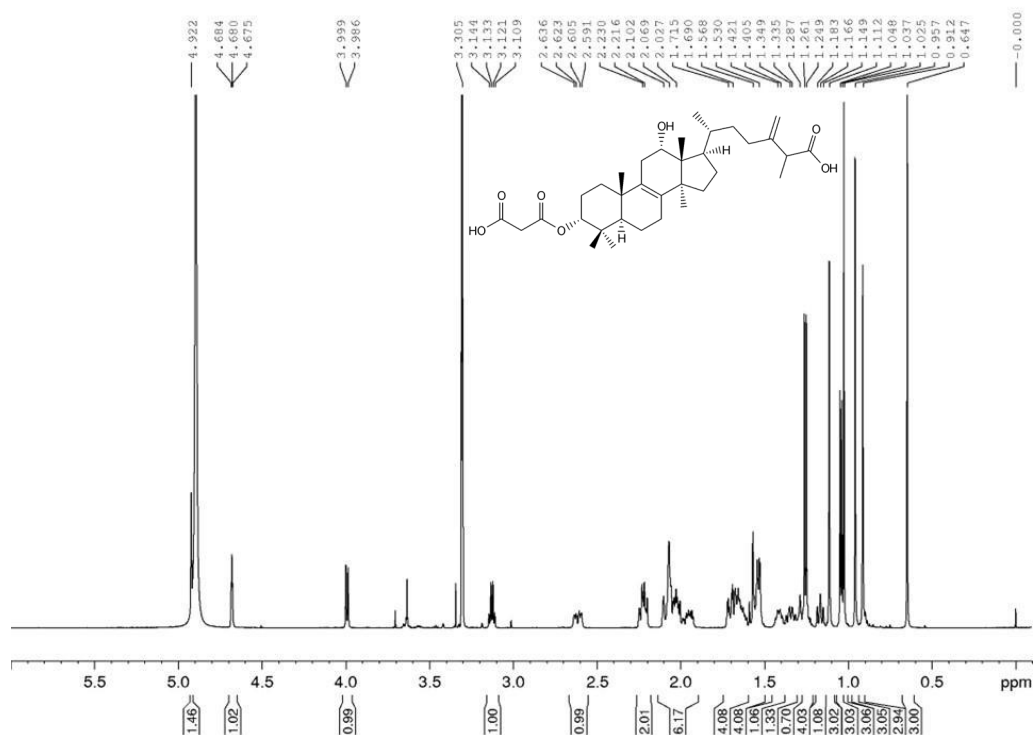

Figure S47. <sup>1</sup>H spectrum of compound 6 (150 MHz, CD<sub>3</sub>OD, 295 K)

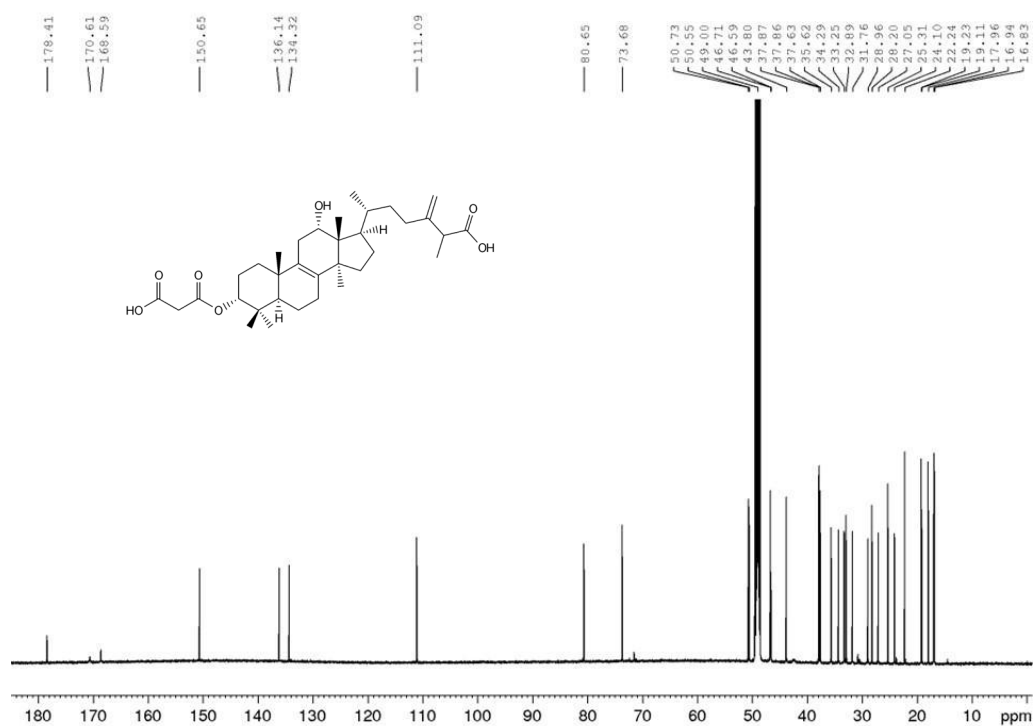

Figure S48. <sup>13</sup>C spectrum of compound 6 (600 MHz, CD<sub>3</sub>OD, 295 K)

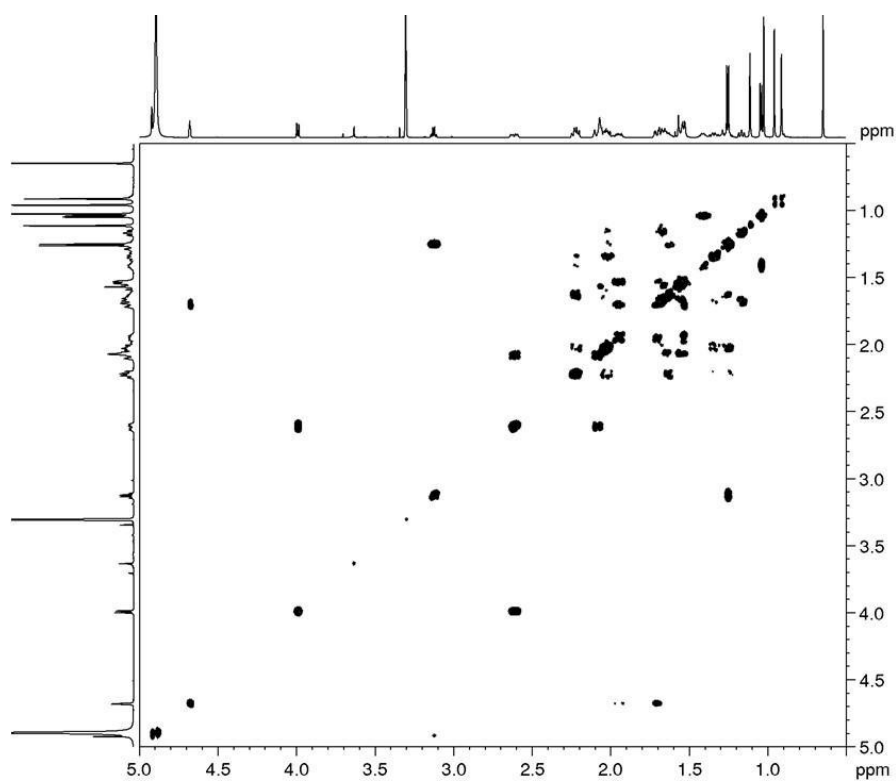

Figure S49. COSY spectrum of compound **6** (600 MHz, CD<sub>3</sub>OD, 295 K)

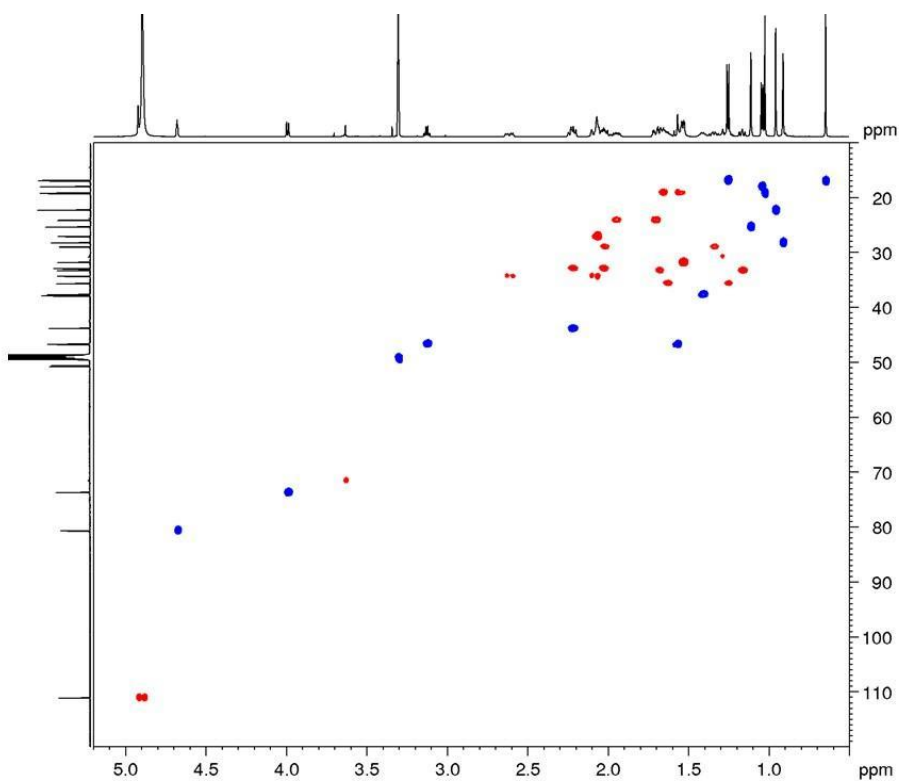

Figure S50. DEPT-edited HSQC spectrum of compound **6** (600 MHz CD<sub>3</sub>OD, 295 K)

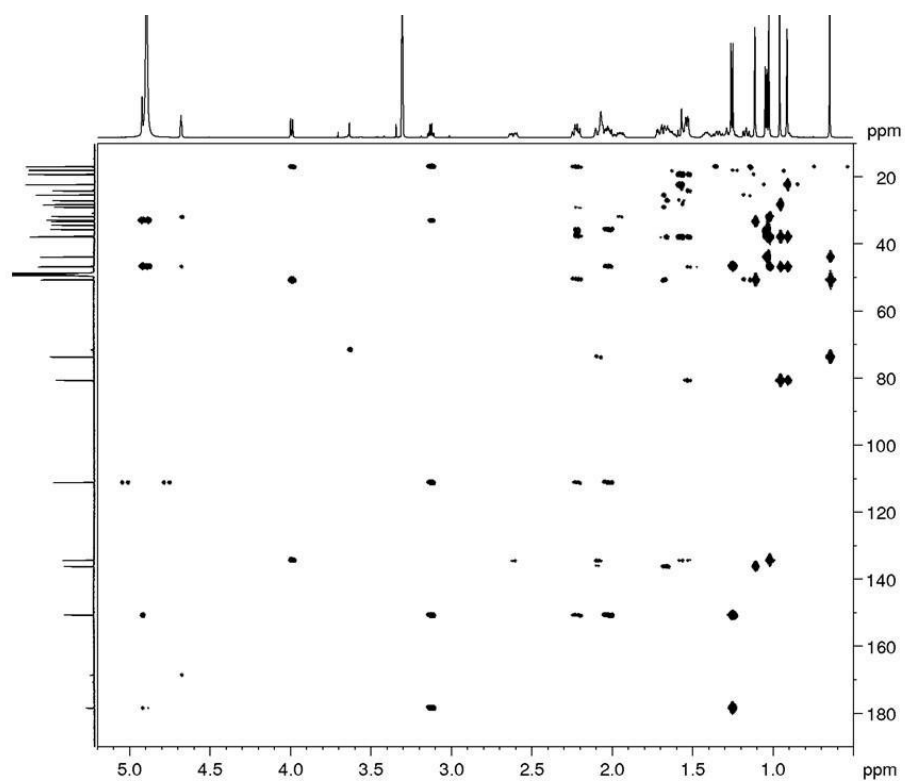

Figure S51. HMBC spectrum of compound **6** (600 MHz,  $\text{CD}_3\text{OD}$ , 295 K)

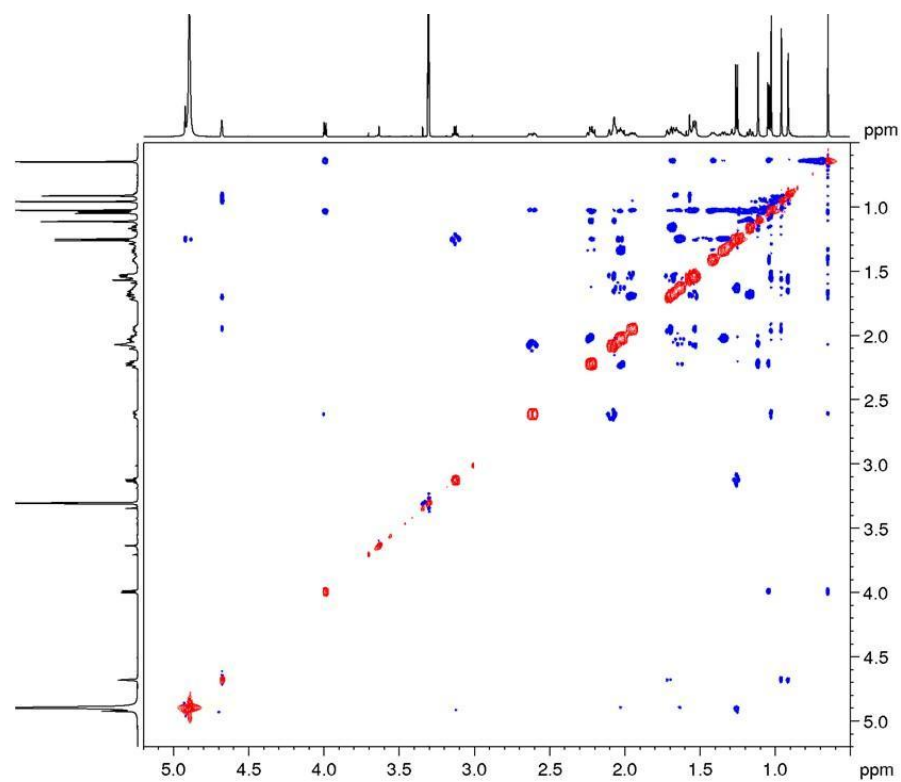

Figure S52. NOESY spectrum of compound **6** (600 MHz,  $\text{CD}_3\text{OD}$ , 295 K)



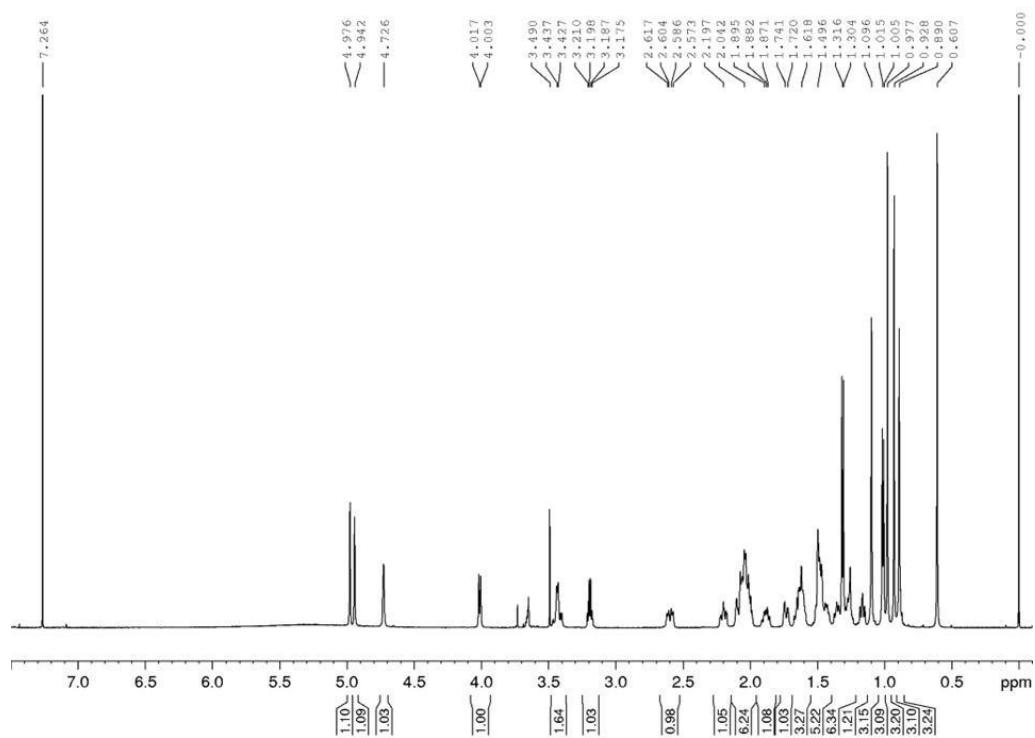

Figure S53.  $^1\text{H}$  spectrum of compound **6** (600 MHz,  $\text{CDCl}_3$ , 295 K)

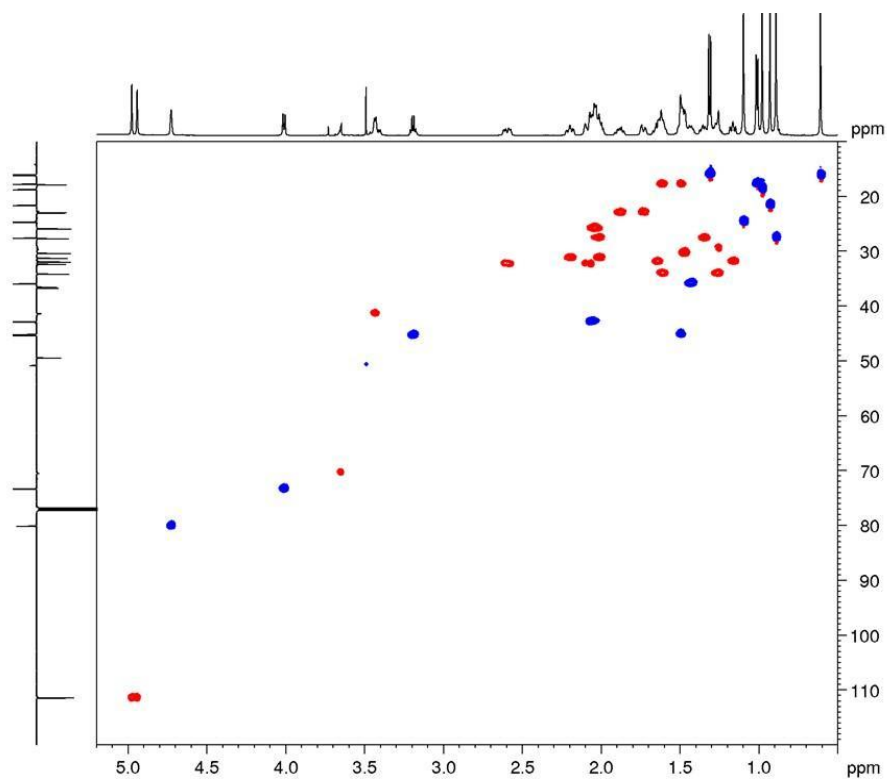

Figure S54. DEPT-edited HSQC spectrum of compound **6** (600 MHz,  $\text{CDCl}_3$ , 295 K)

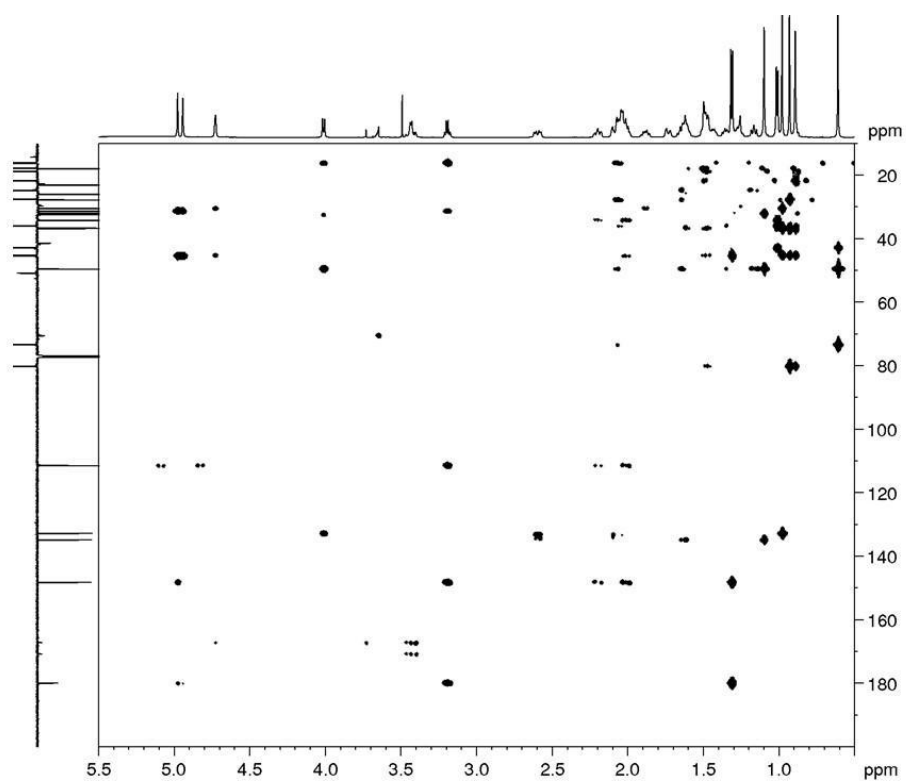

Figure S55. HMBC spectrum of compound **6** (600 MHz, CDCl<sub>3</sub>, 295 K)

## Spectra and spectral data on compound 7

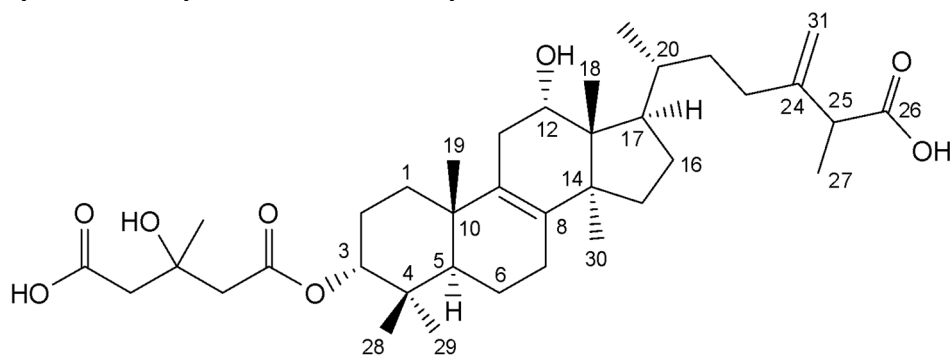

HR-ESI-MS (-)  $m/z$  629.4063 [ $M - H$ ]<sup>-</sup> (629.4048 calcd. for  $C_{37}H_{57}O_8$   $\Delta$  2.3 ppm;); HR-ESI-MSMS (CID = 15%, 30%, 45%) 567.4055, 527.3735, 485.3621, 483 (27), 441.3735

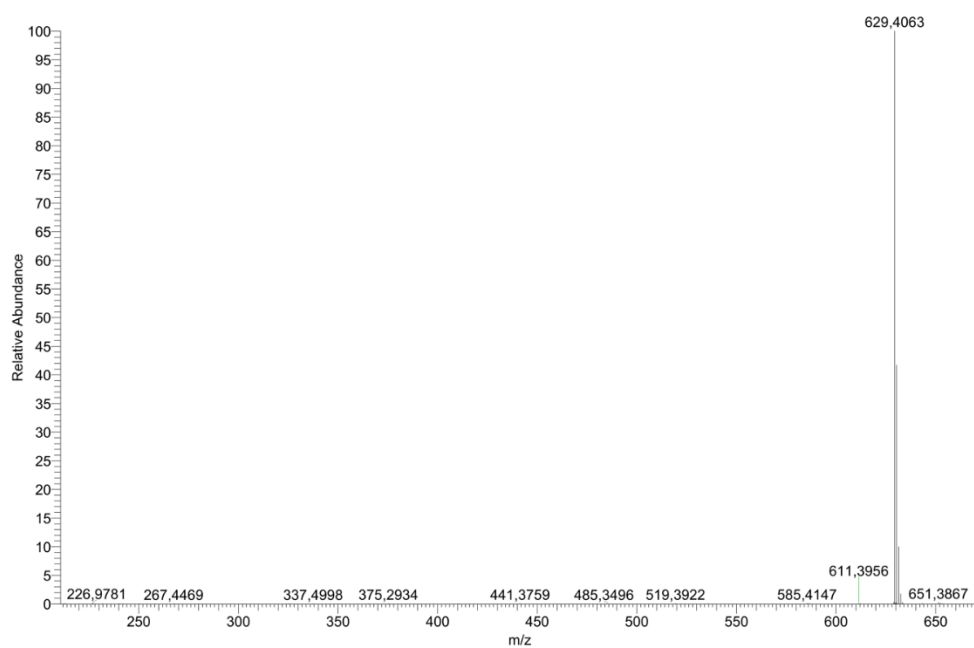

Figure S56. HR-ESI-MS spectrum of compound 7

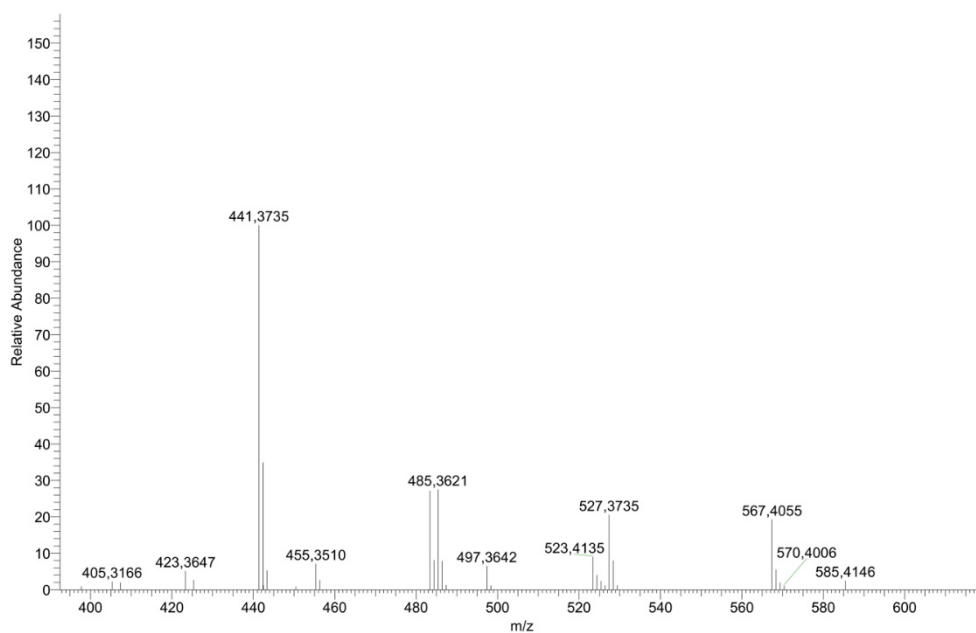

Figure S57. MS-MS spectrum of compound 7

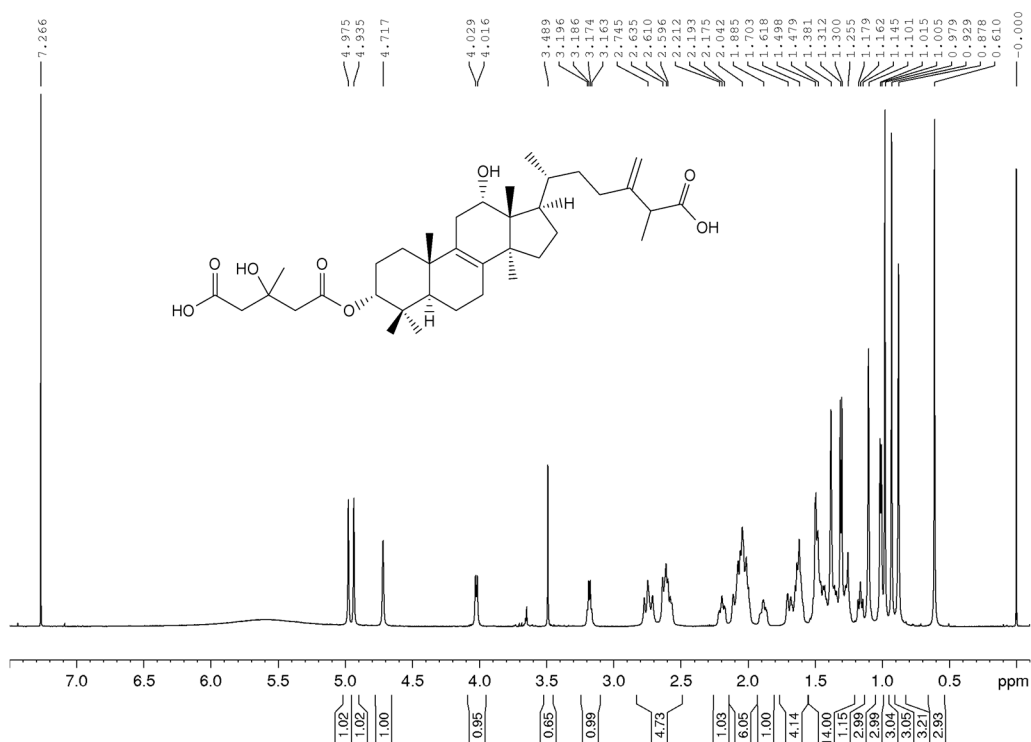

Figure S58. <sup>1</sup>H spectrum of compound 7 (600 MHz, CDCl<sub>3</sub>, 295 K)

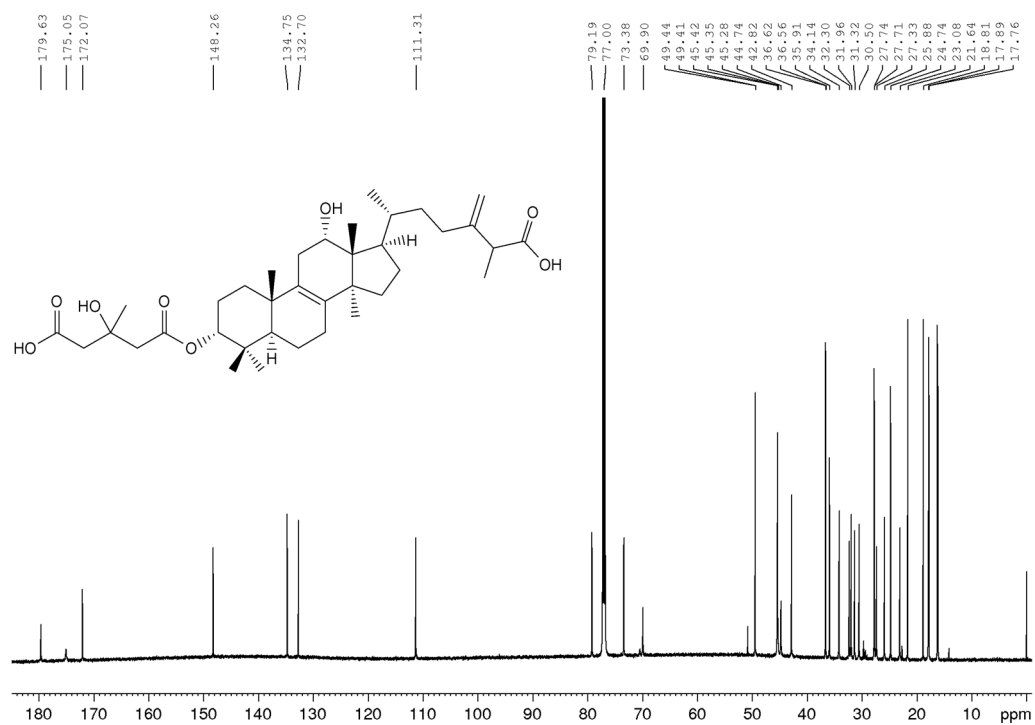

Figure S59.  $^{13}\text{C}$  spectrum of compound **7** (150 MHz,  $\text{CDCl}_3$ , 295 K),

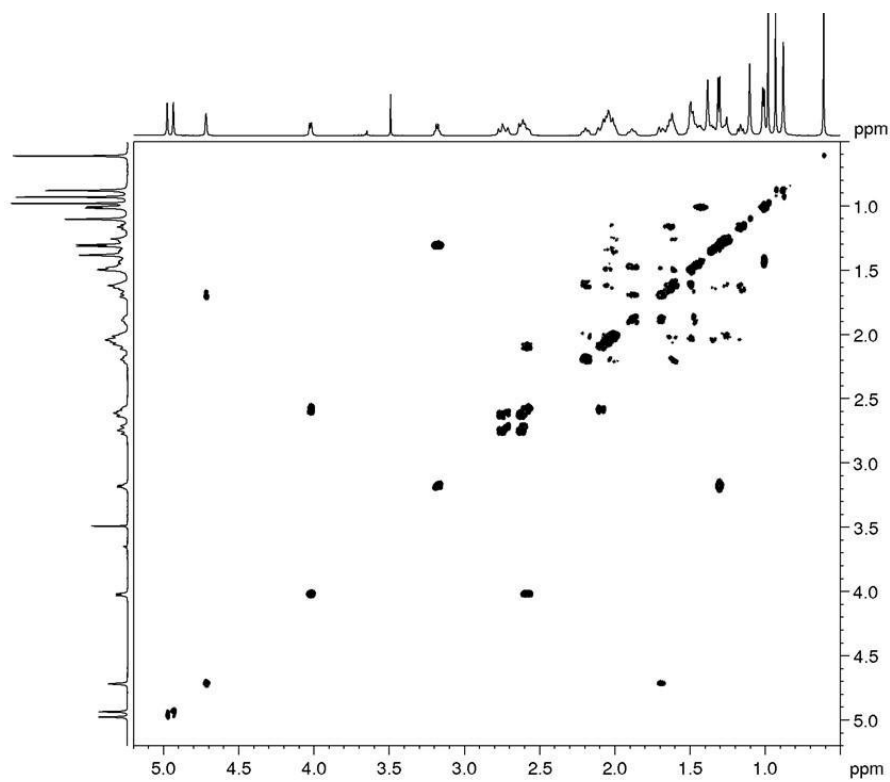

Figure S60. COSY spectrum of compound **7** (600 MHz,  $\text{CDCl}_3$ , 295 K)

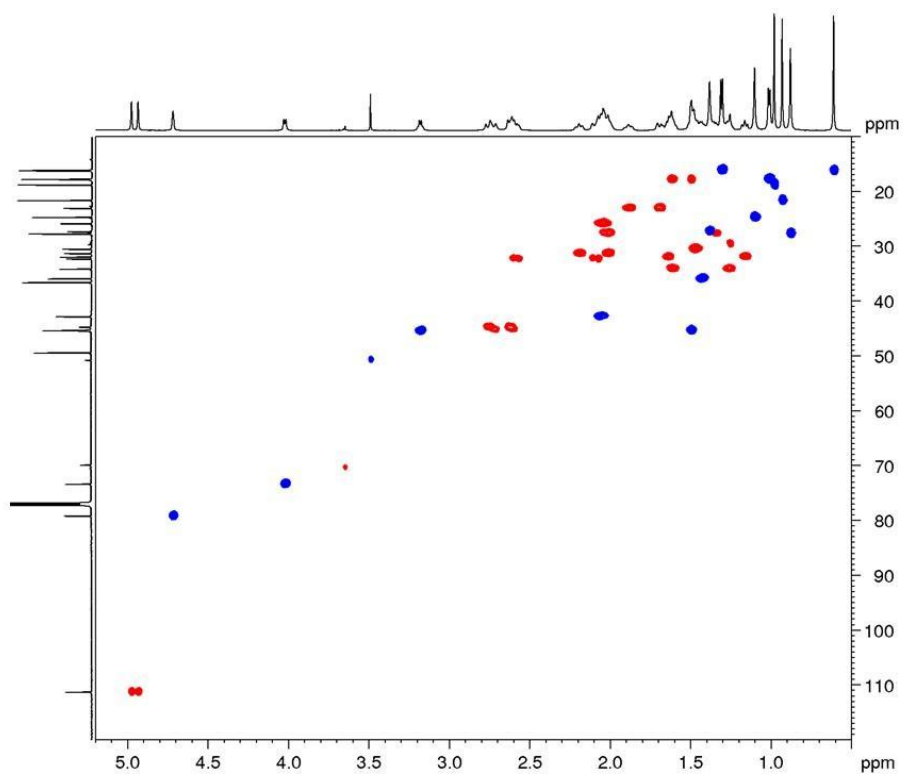

Figure S61. DEPT-edited HSQC spectrum of compound **7** (600 MHz,  $\text{CDCl}_3$ , 295 K)

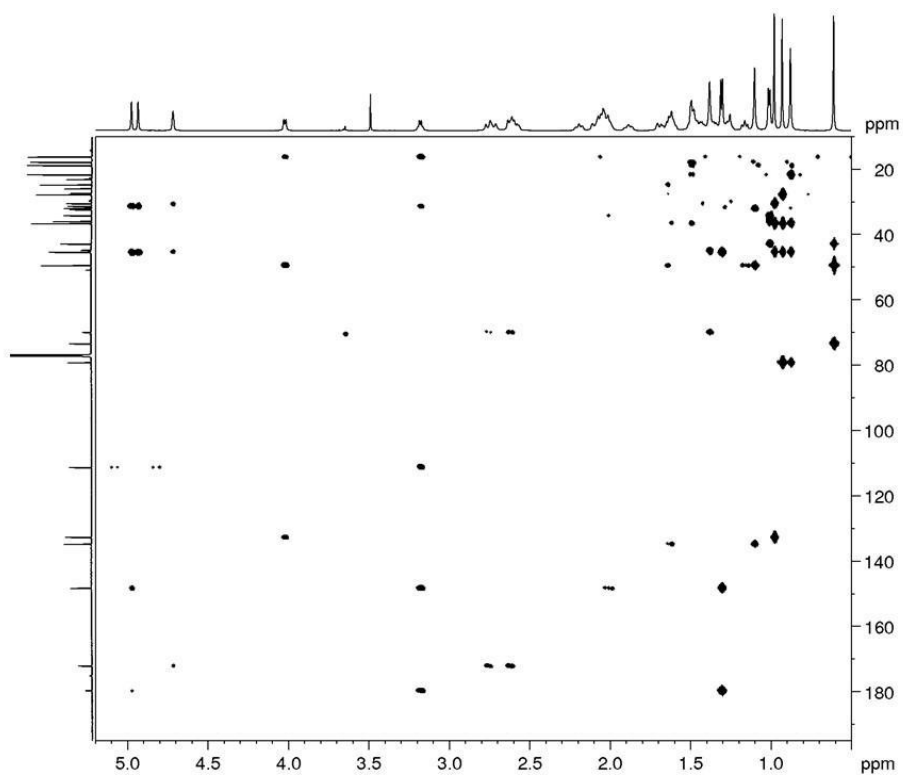

Figure S62. HMBC spectrum of compound **7** (600 MHz,  $\text{CDCl}_3$ , 295 K)

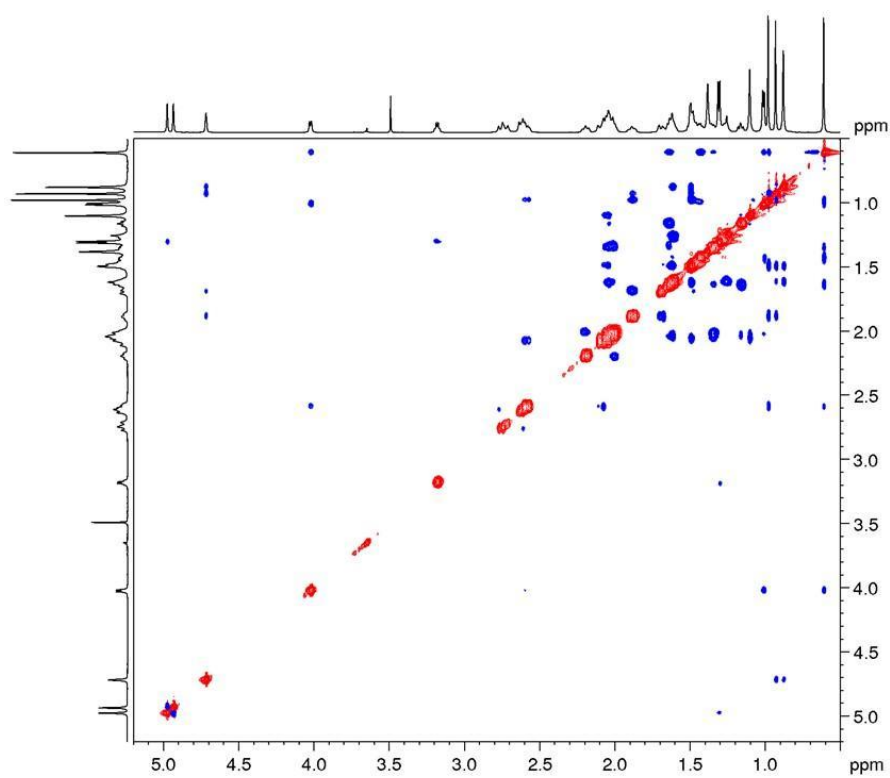

Figure S63. ROESY spectrum of compound **7** (600 MHz, CDCl<sub>3</sub>, 295 K)

## Spectra and spectral data on compound 8

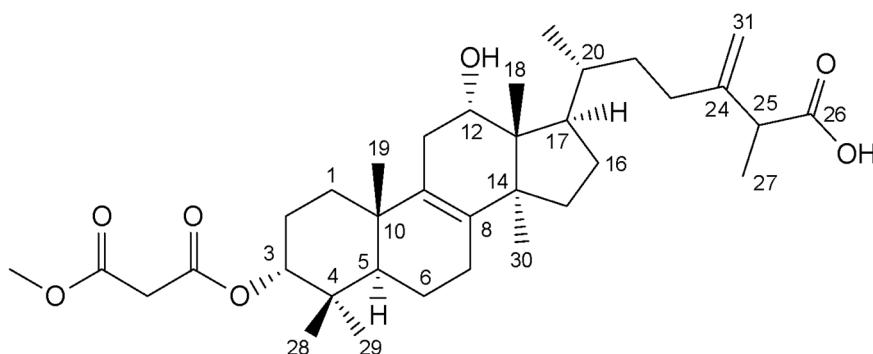

HR-ESI-MS (-)  $m/z$  585.3798 [ $M - H$ ]<sup>-</sup> (585.3786 calcd. for  $C_{35}H_{53}O_7$ ;  $\Delta$  2.1 ppm); HR-ESI-MSMS (CID = 15%, 30%, 45%) 541.3893, 509.3629, 441.3734

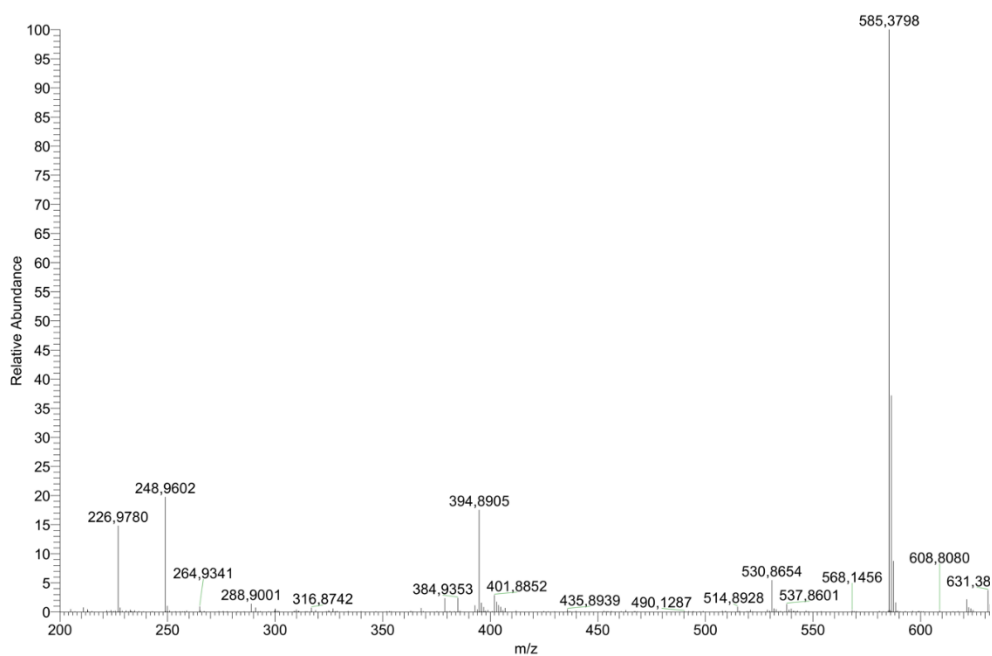

Figure S64. HR-ESI-MS spectrum of compound 8



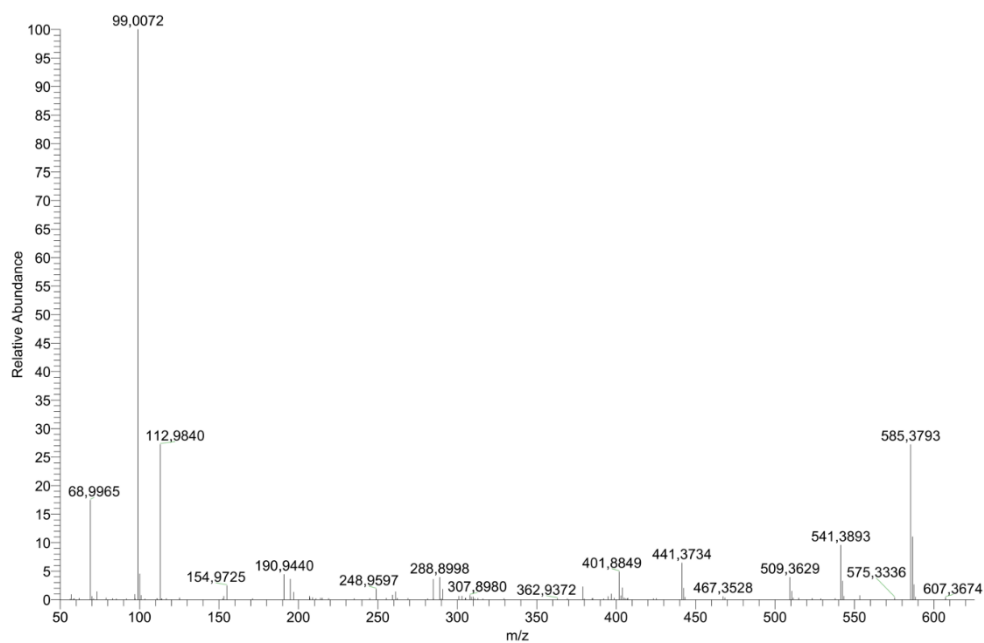

Figure S65. MS-MS spectrum of compound **8**

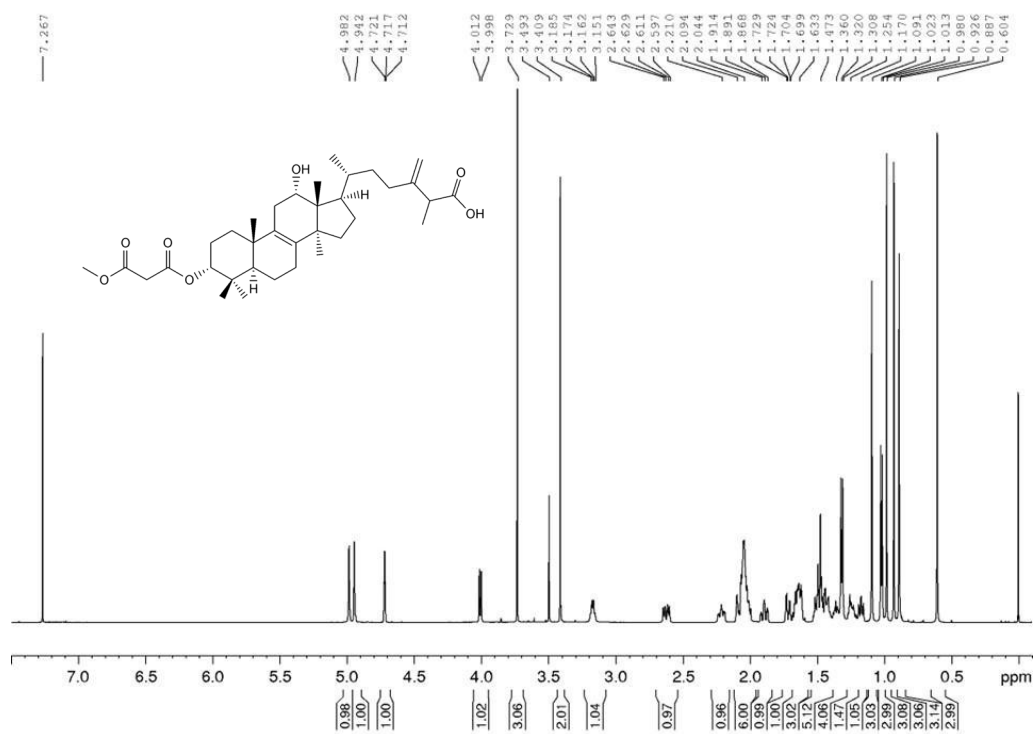

Figure S66. <sup>1</sup>H spectrum of compound **8** (600 MHz, CDCl<sub>3</sub>, 295 K)

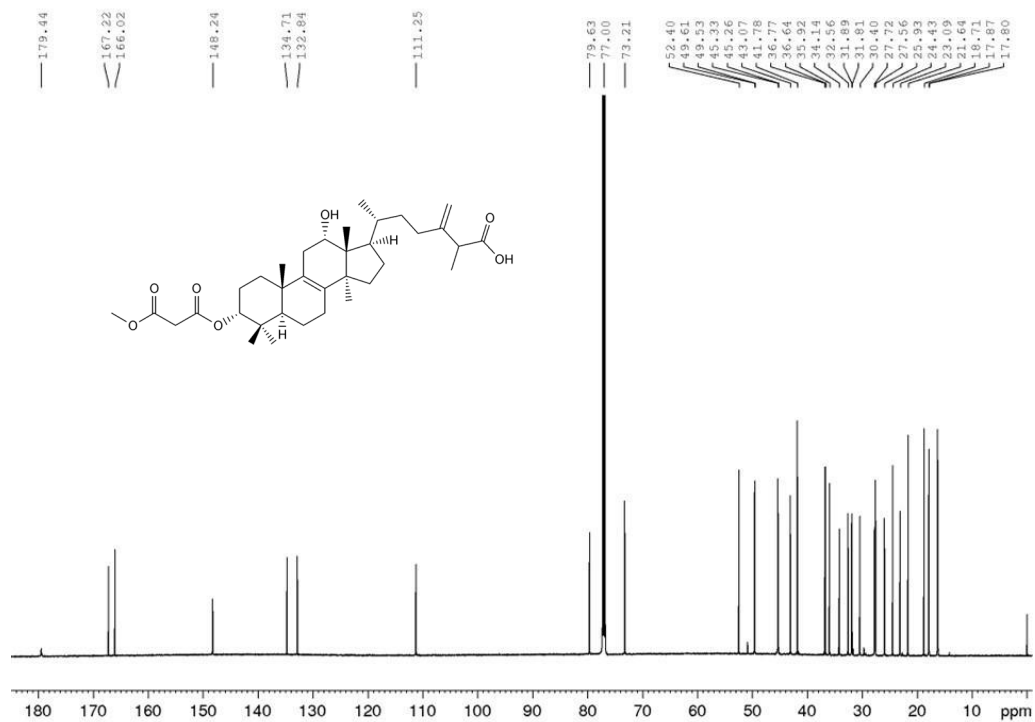

Figure S67.  $^{13}\text{C}$  spectrum of compound **8** (150 MHz,  $\text{CDCl}_3$ , 295 K)

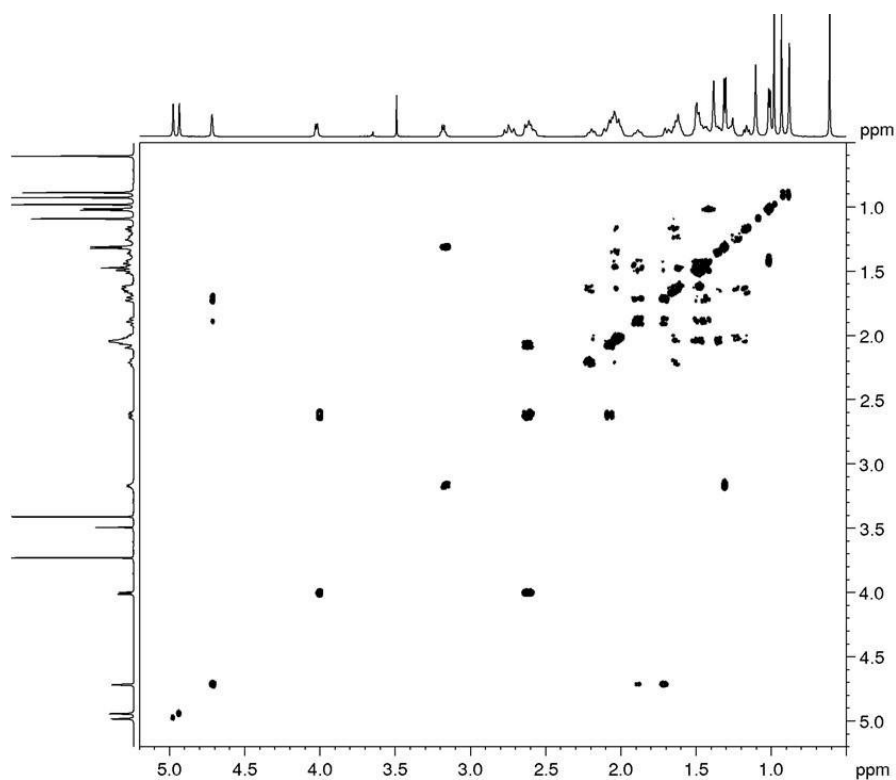

Figure S68. COSY spectrum of compound **8** (600 MHz,  $\text{CDCl}_3$ , 295 K)

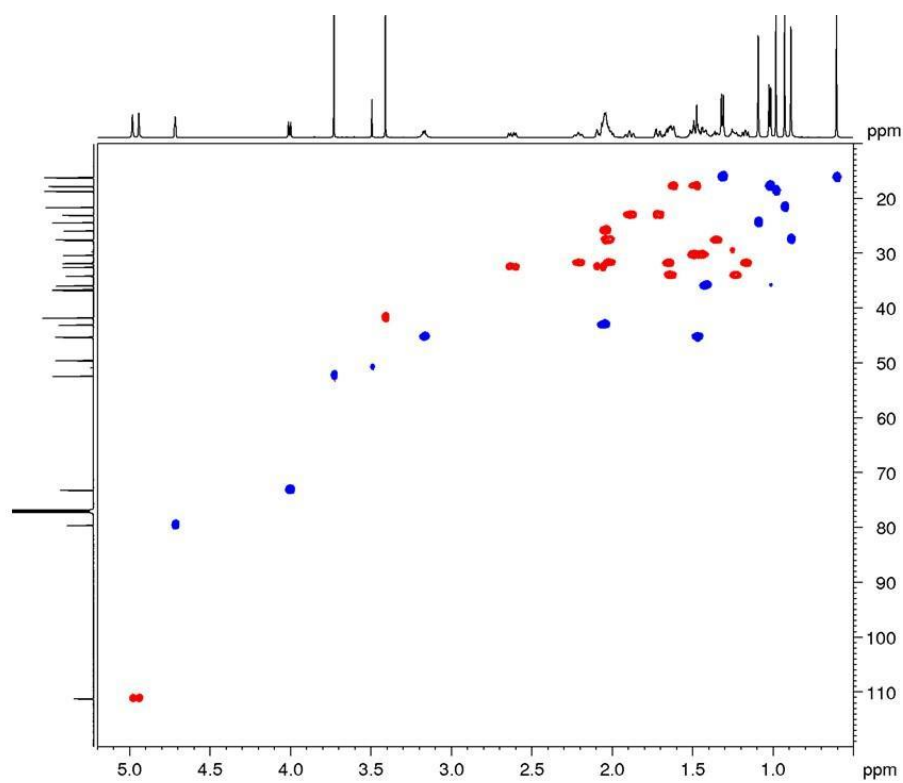

Figure S69. DEPT-edited HSQC spectrum of compound **8** (600 MHz,  $\text{CDCl}_3$ , 295 K)

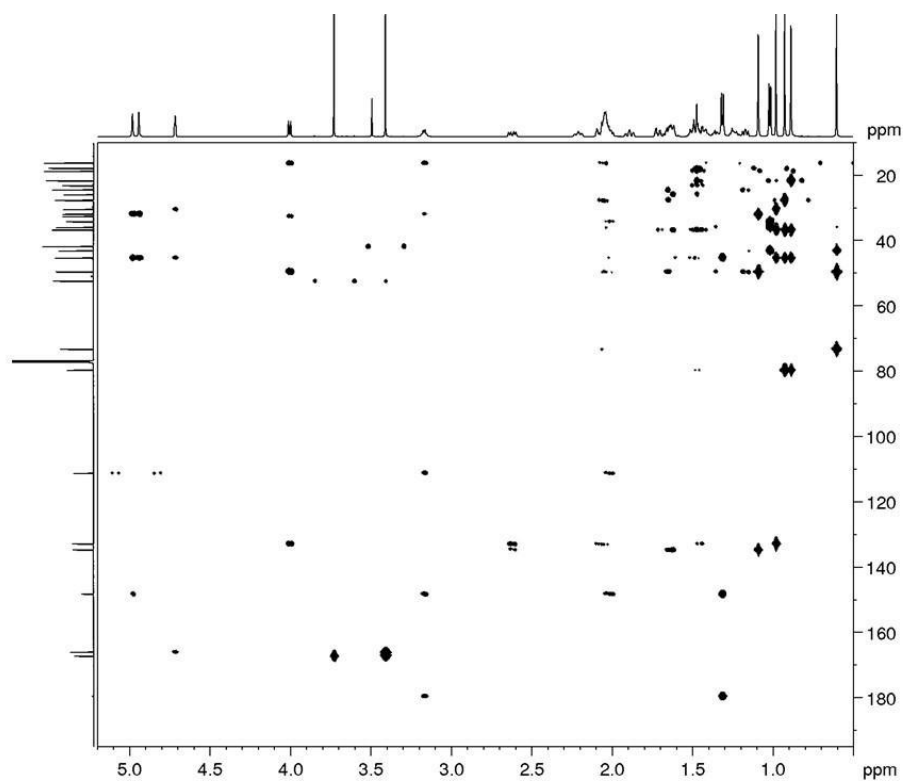

Figure S70. HMBC spectrum of compound **8** (600 MHz,  $\text{CDCl}_3$ , 295 K)

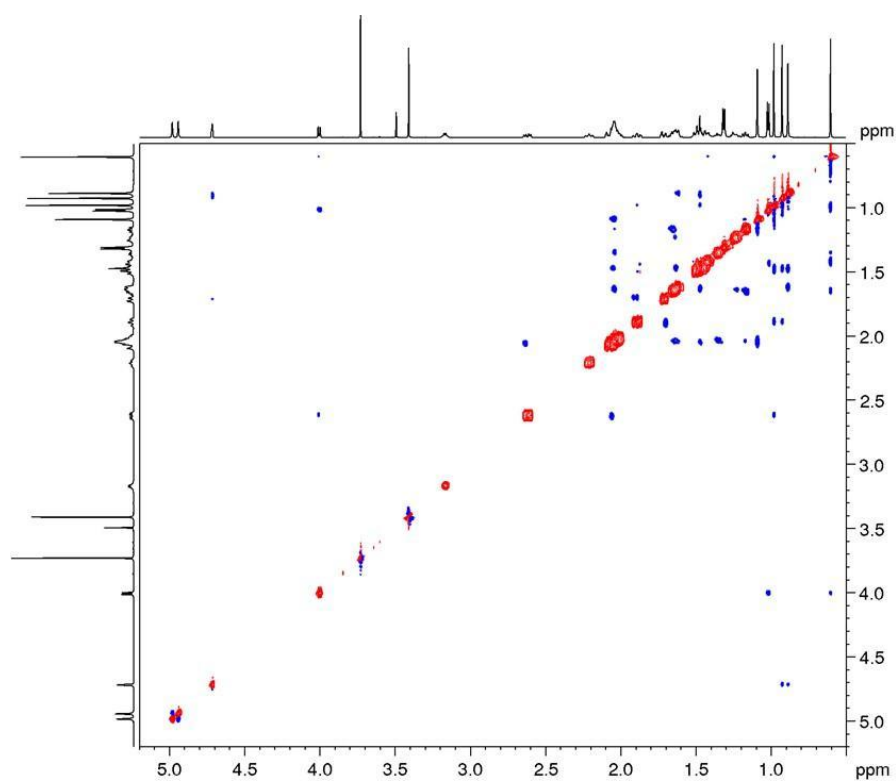

Figure S71. ROESY spectrum of compound **8** (600 MHz, CDCl<sub>3</sub>, 295 K)

## Spectra and spectral data on compound 9

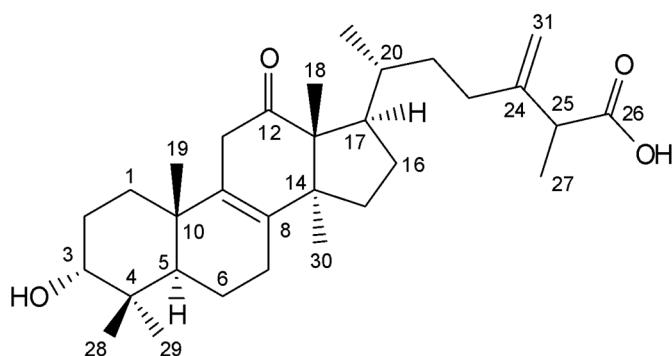

HR-ESI-MS (+)  $m/z$  485.3616  $[M + H]^+$  (485.3625 calcd. for  $C_{31}H_{49}O_4$ ;  $\Delta$  -1.9 ppm); HR-ESI-MSMS (CID = 15%, 30%, 45%) 467.3510, 449.3404

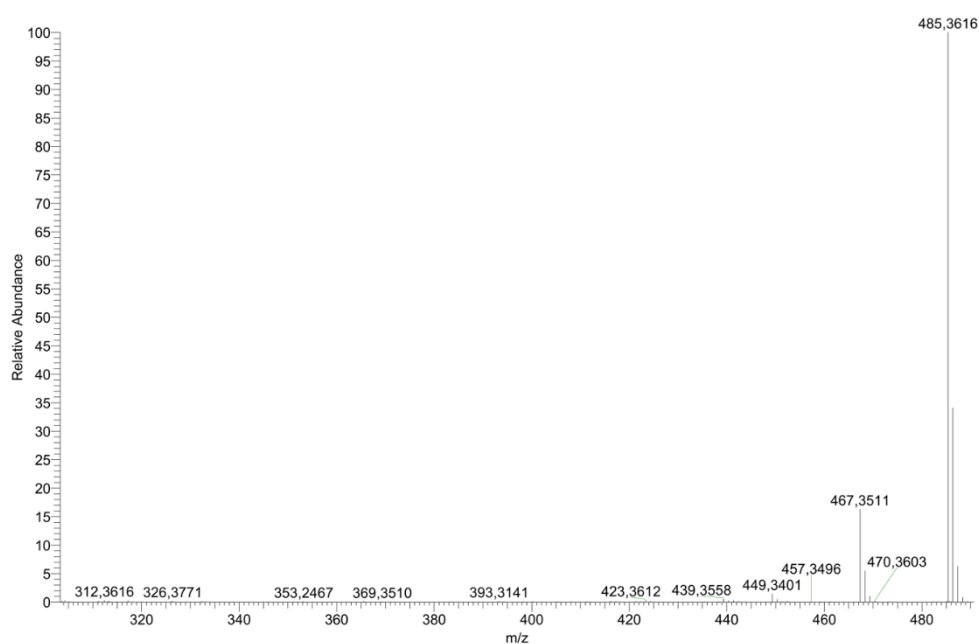

Figure S72. HR-ESI-MS spectrum of compound 9

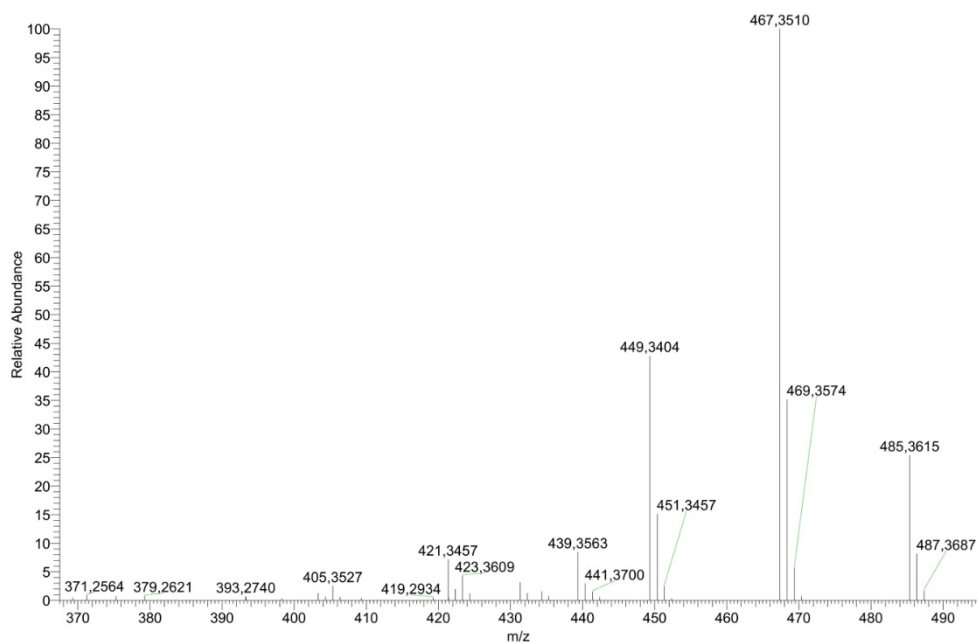

Figure S73. MS-MS spectrum of compound 9

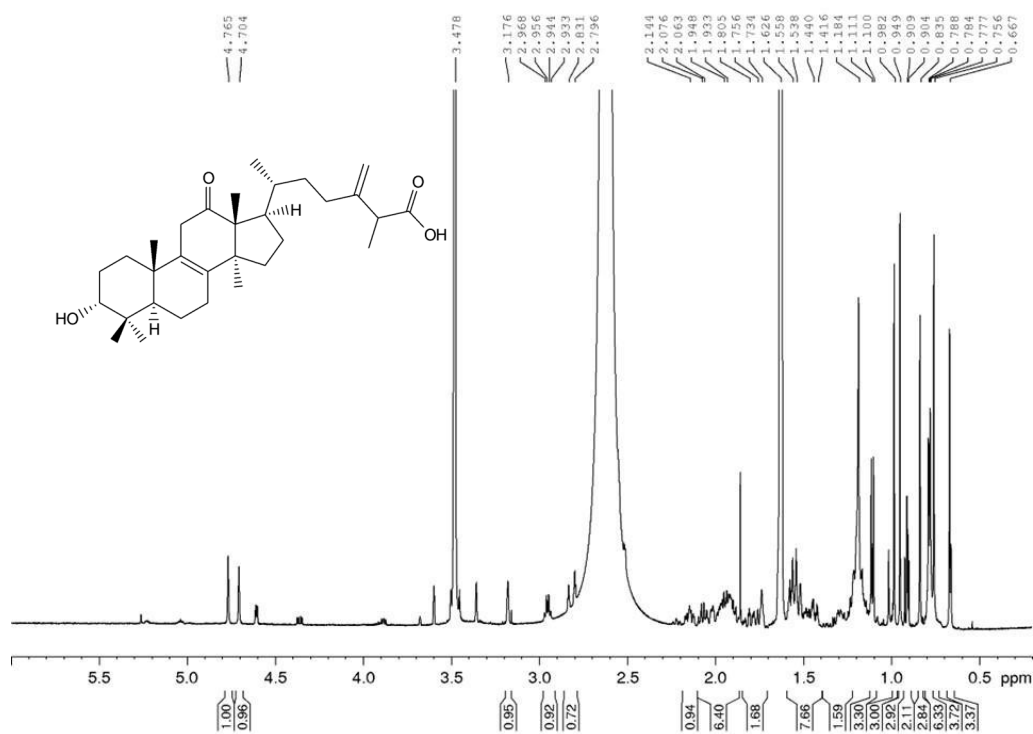

Figure S74. <sup>1</sup>H spectrum of compound 9 (600 MHz, CDCl<sub>3</sub>, 295 K)

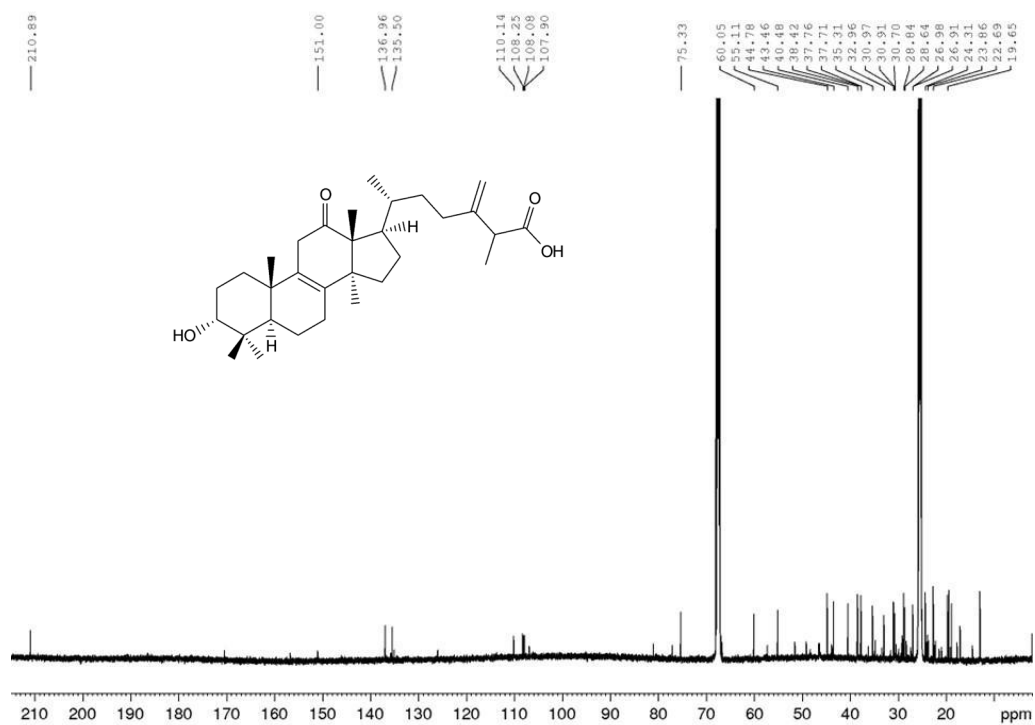

Figure S75.  $^{13}\text{C}$  spectrum of compound 9 (150 MHz,  $\text{CDCl}_3$ , 295 K)

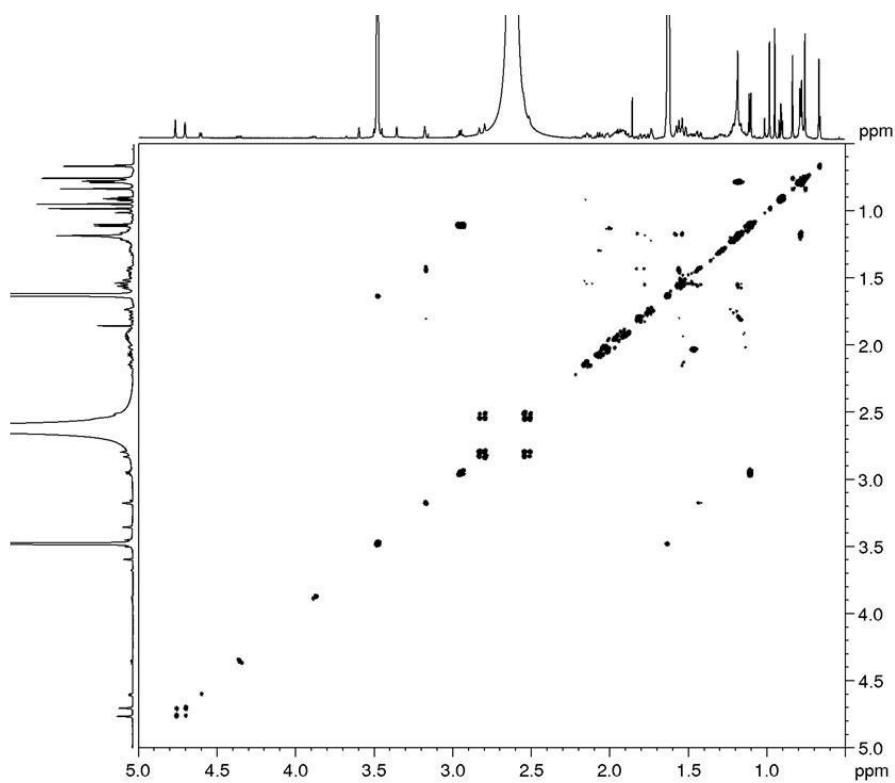

Figure S76. COSY spectrum of compound 9 (600 MHz,  $\text{CDCl}_3$ , 295 K)

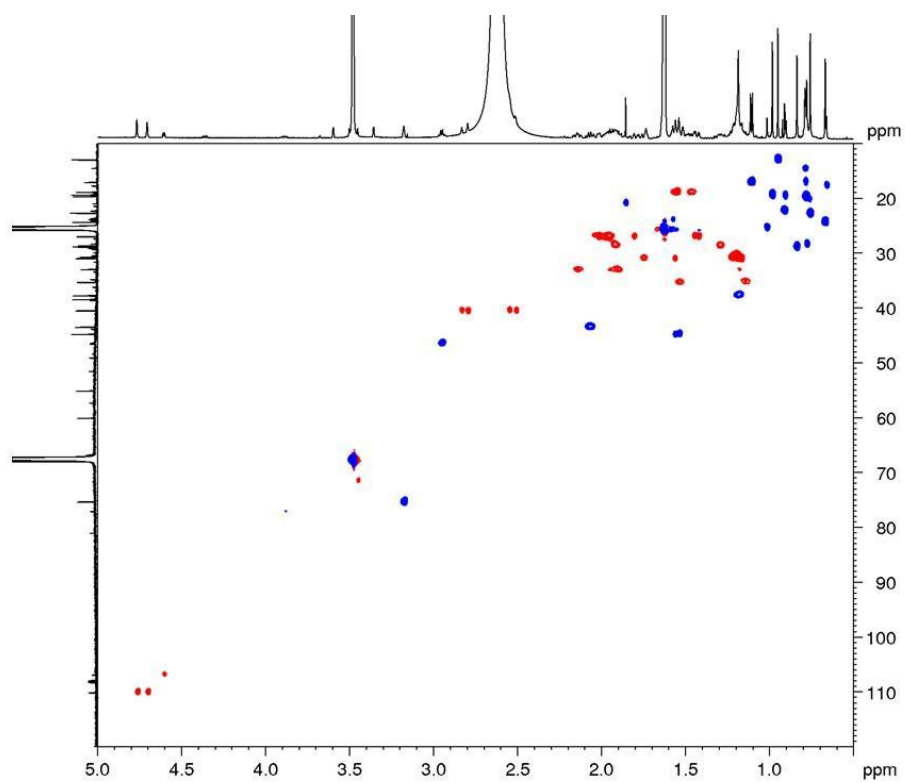

Figure S77. DEPT-edited HSQC spectrum of compound **9** (600 MHz, CDCl<sub>3</sub>, 295 K)

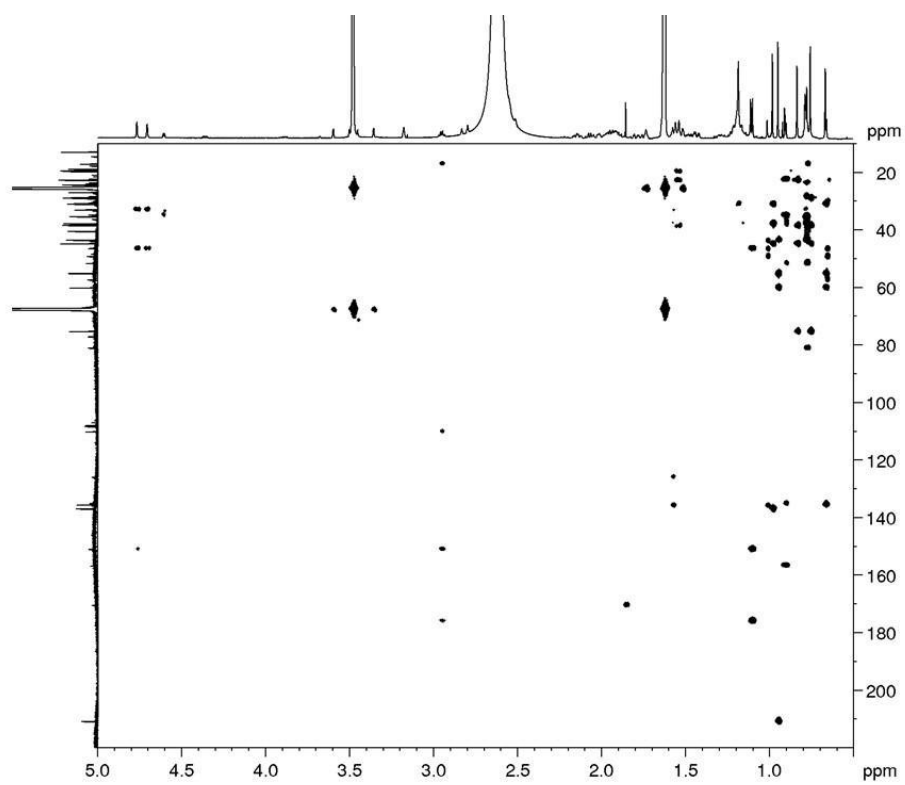

Figure S78. HMBC spectrum of compound **9** (600 MHz, CDCl<sub>3</sub>, 295 K)



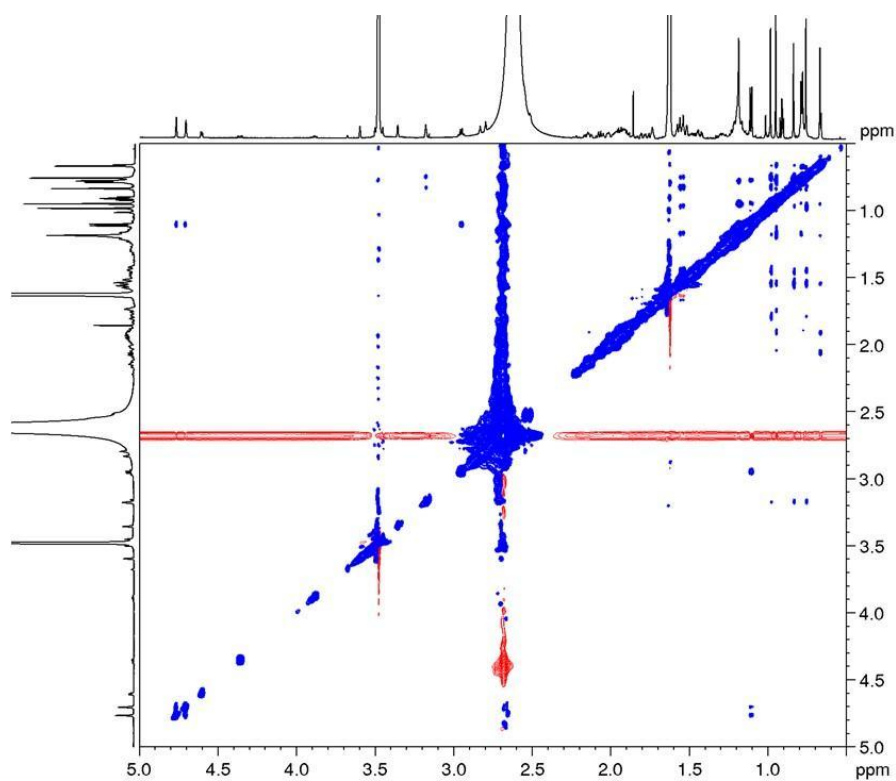

Figure S79. NOESY spectrum of compound **9** (600 MHz,  $\text{CDCl}_3$ , 295 K)

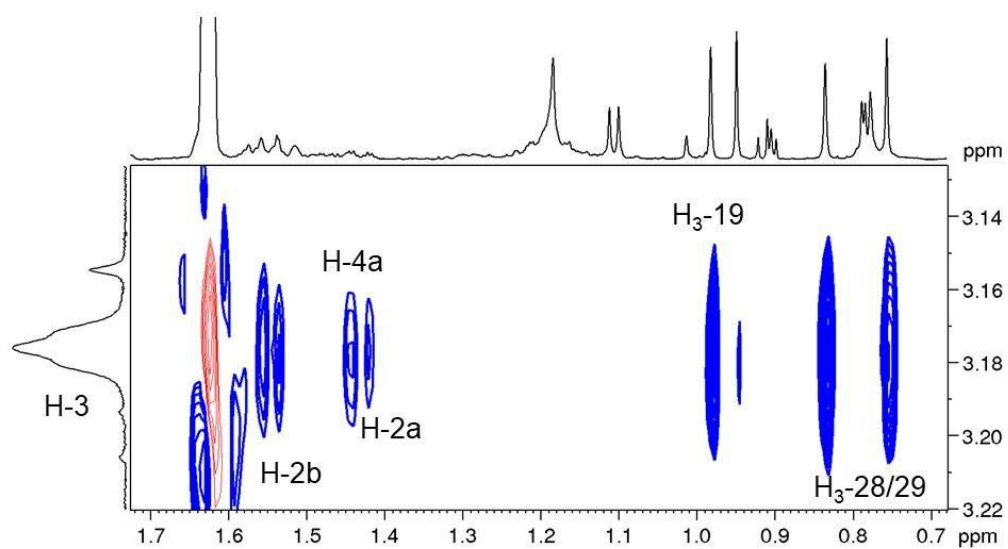

Figure S80. NOESY spectrum of compound **9** (600 MHz,  $\text{CDCl}_3$ , 295 K)

## Spectra and spectral data on compound **10**

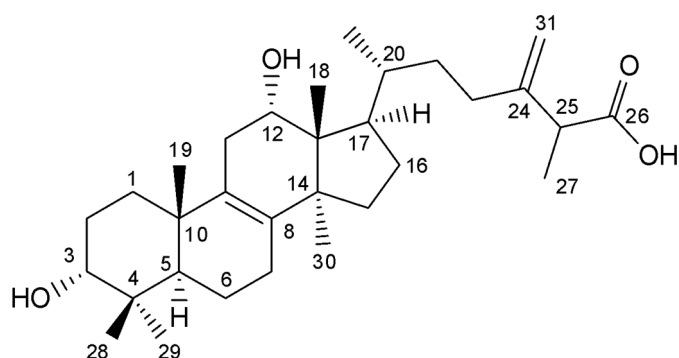

HR-ESI-MS (-)  $m/z$  485.3638 [ $M - H$ ]<sup>-</sup> (485.3625 calcd. for  $C_{31}H_{49}O_4$ ;  $\Delta$  2.6 ppm); HR-ESI-MSMS (CID = 15%, 30%, 45%) 455.3529, 441.3736, 423.3636

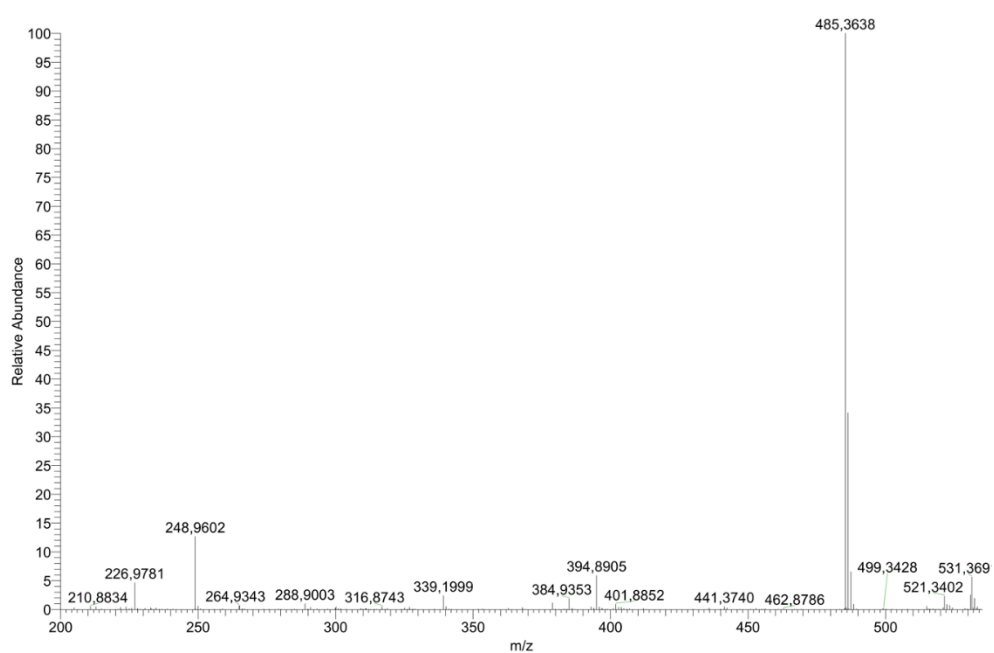

Figure S81. HR-ESI-MS spectrum of compound **10**

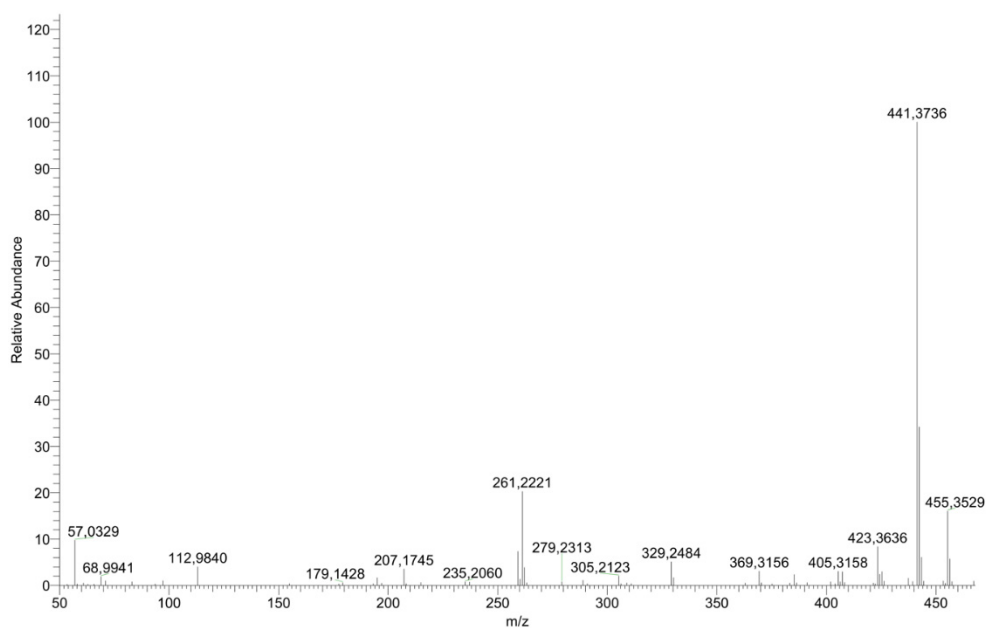

Figure S82. MS-MS spectrum of compound **10**

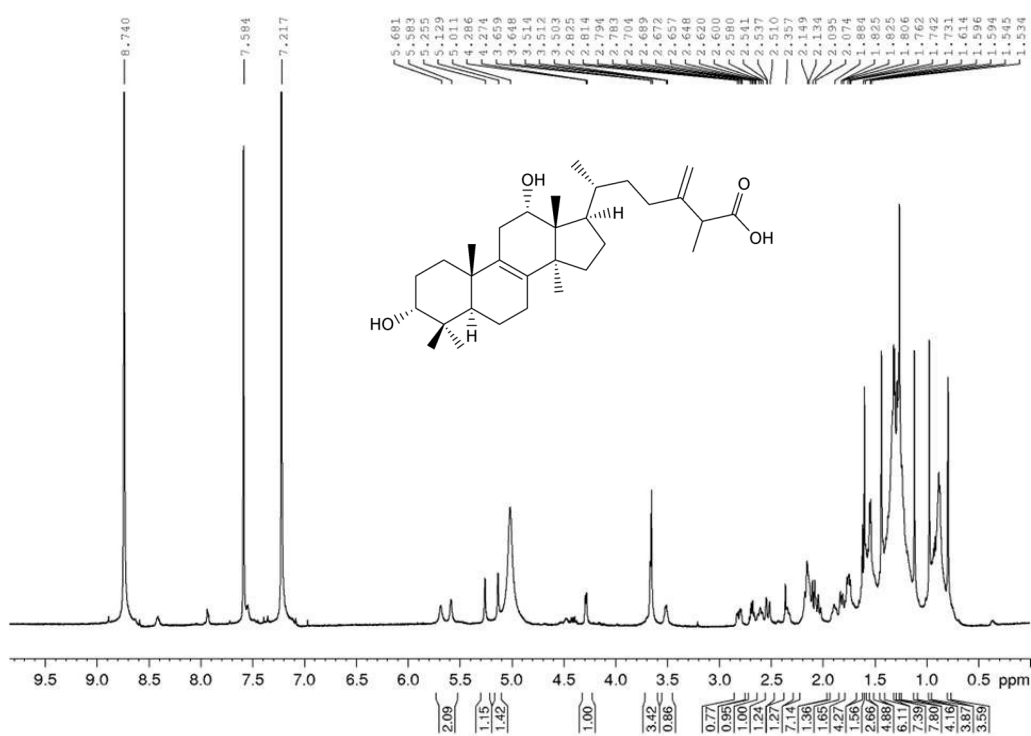

Figure S83. <sup>1</sup>H spectrum of compound **10** (600 MHz, pyridine-*d*<sub>5</sub>, 295 K)

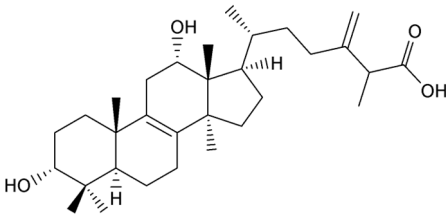

Figure S84.  $^{13}\text{C}$  spectrum of compound **10** (150 MHz, pyridine- $d_5$ , 295 K)

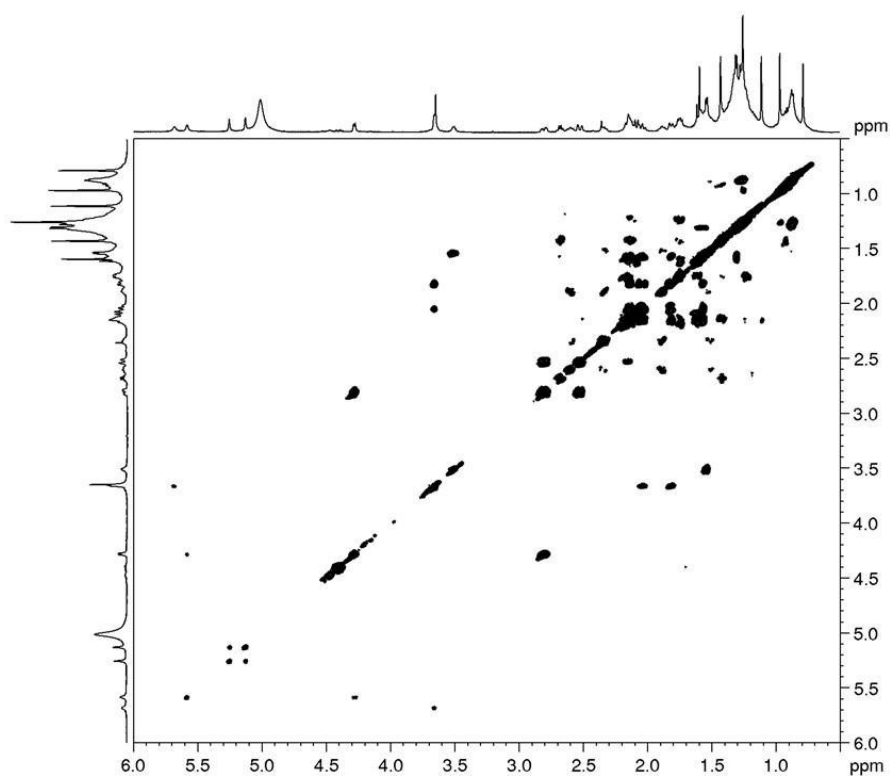

Figure S85. COSY spectrum of compound **10** (600 MHz, pyridine-*d*<sub>5</sub>, 295 K)

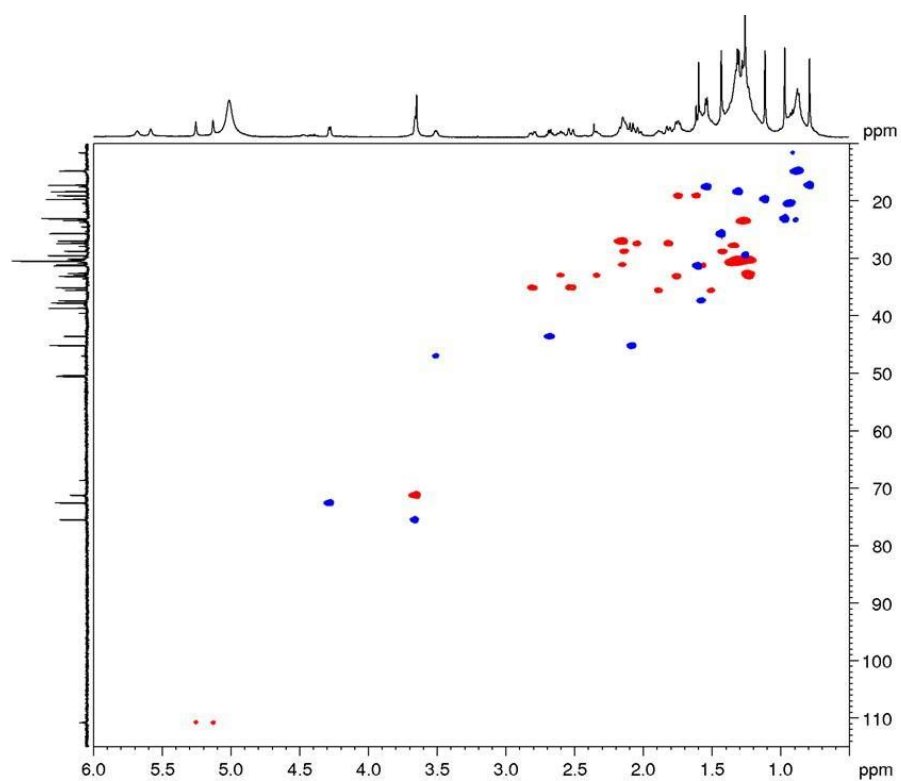

Figure S86. DEPT-edited HSQC spectrum of compound **10** (600 MHz, pyridine- $d_5$ , 295 K)

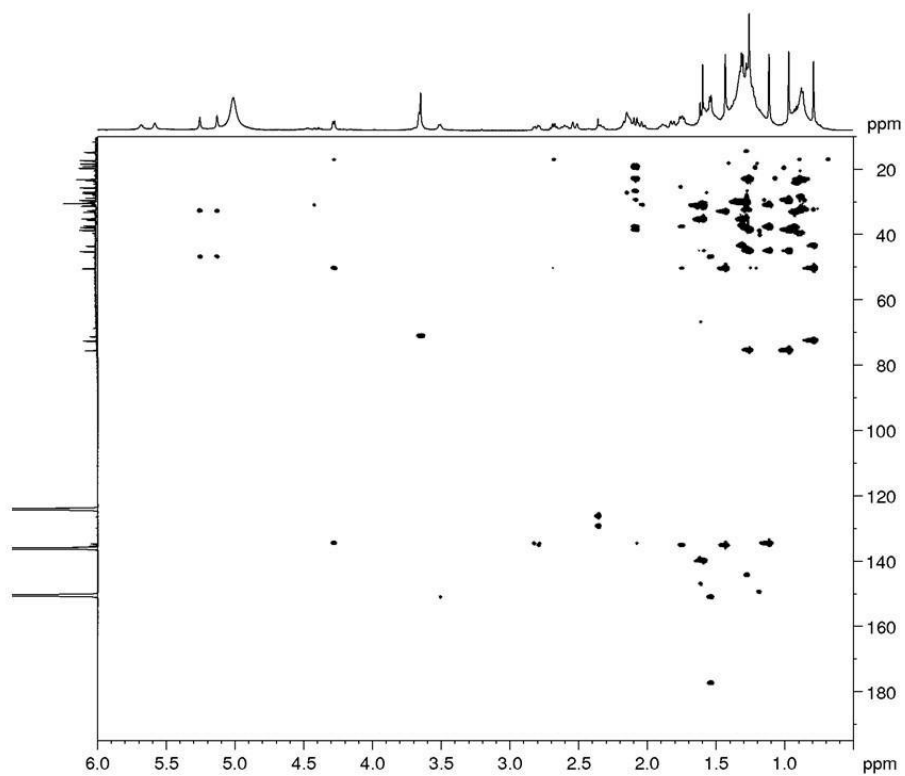

Figure S87. HMBC spectrum of compound **10** (600 MHz, pyridine- $d_5$ , 295 K)

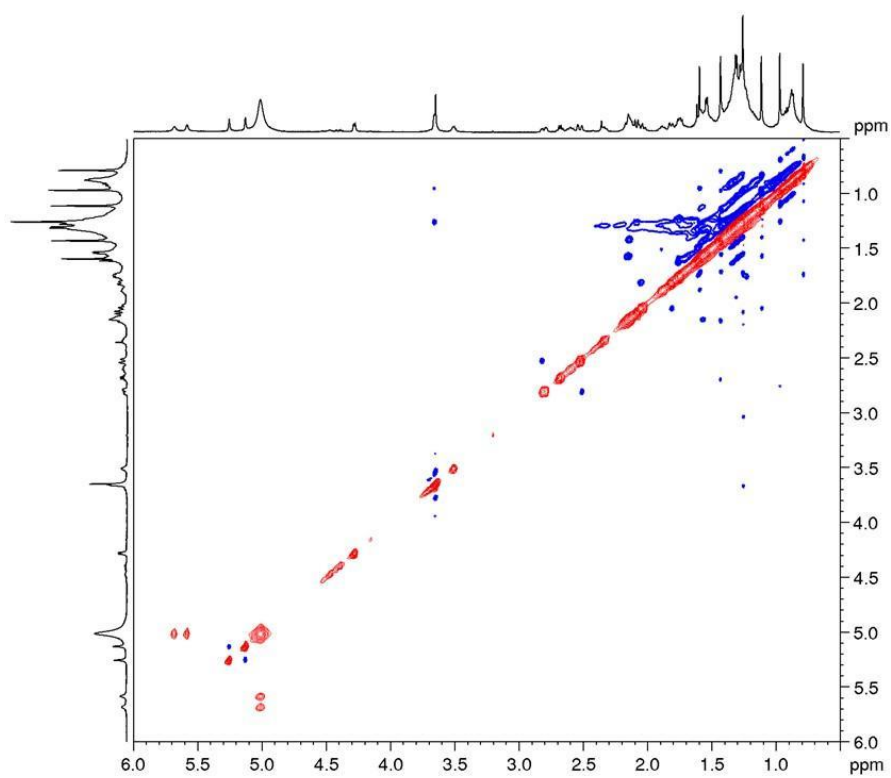

Figure S88. NOESY spectrum of compound **10** (600 MHz, pyridine-*d*<sub>5</sub>, 295 K)

## Spectra and spectral data on compound **11**

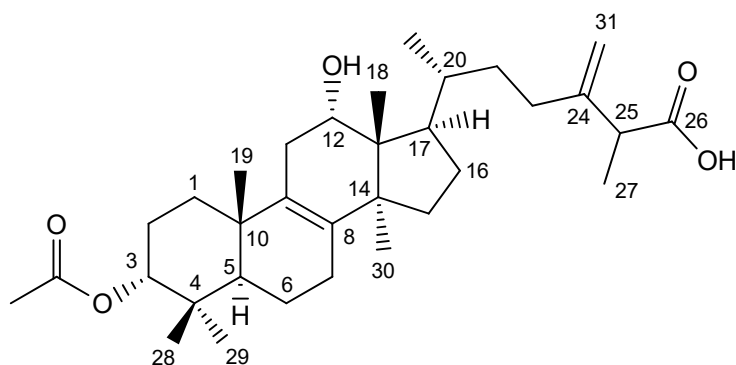

HR-ESI-MS (-)  $m/z$  527.3743 [ $M - H$ ] (527.3731 calcd. for  $C_{34}H_{51}O_5$   $\Delta$  2.3 ppm); HR-ESI-MSMS (CID = 15%, 30%, 45%) 497.3636, 483.3841, 441.3736

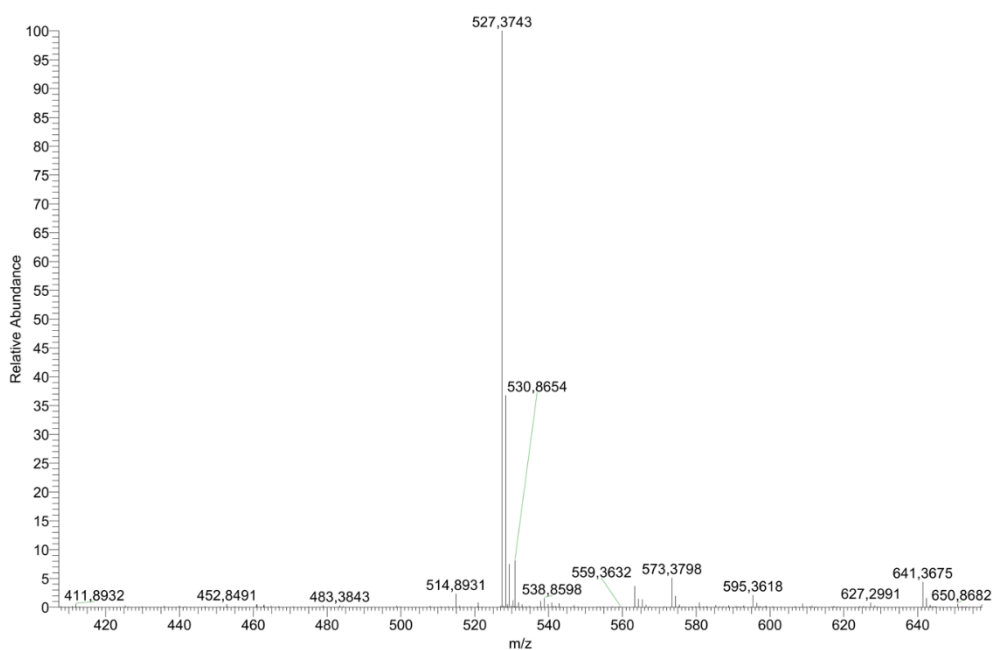

Figure S89. HR-ESI-MS spectrum of compound **11**

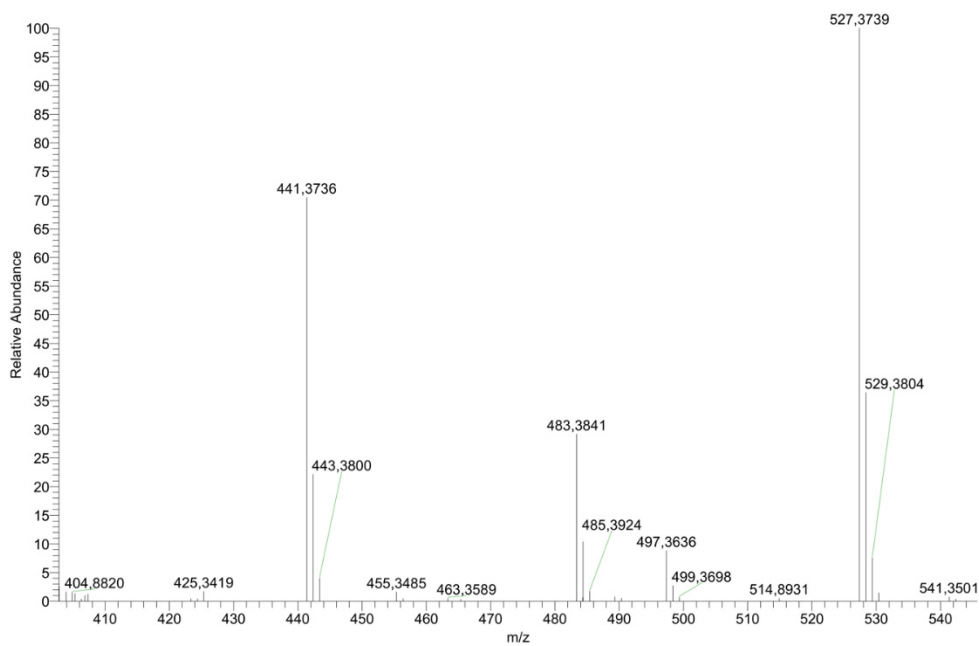

Figure S90. MS-MS spectrum of compound **11**

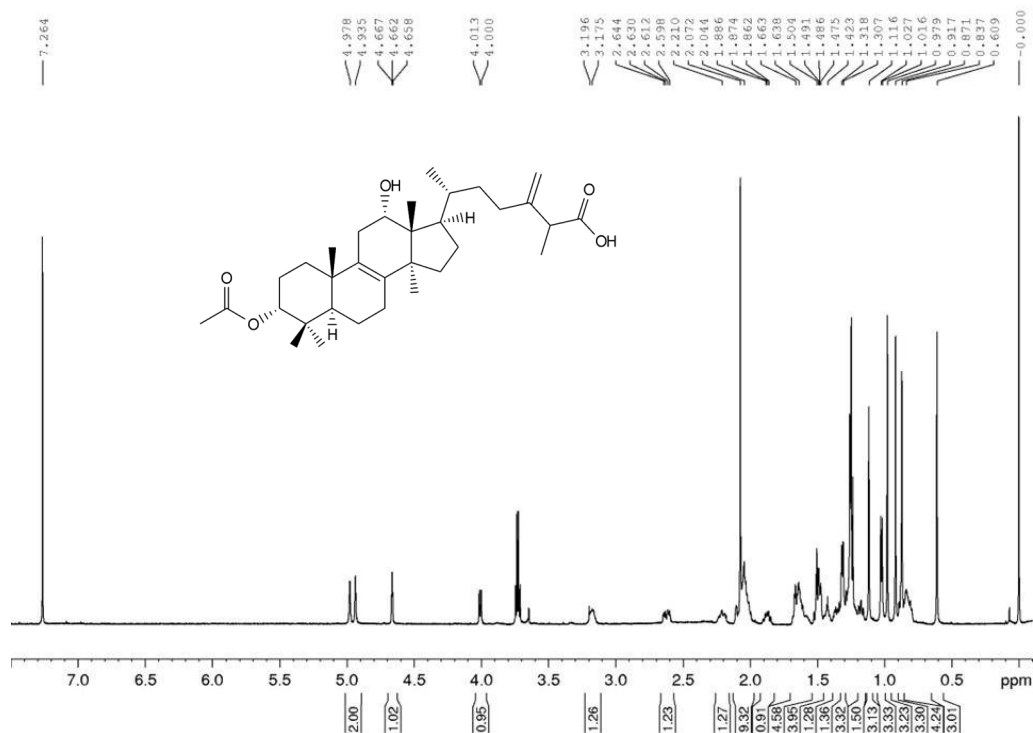

Figure S91. <sup>1</sup>H spectrum of compound **11** (600 MHz, CDCl<sub>3</sub>, 295 K)



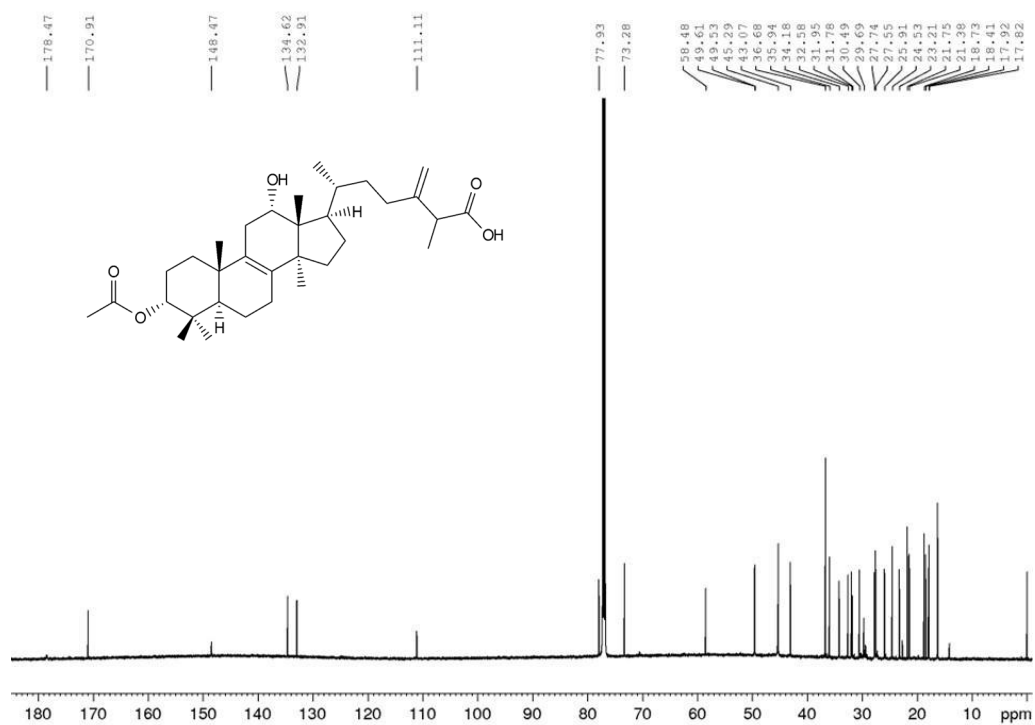

Figure S92.  $^{13}\text{C}$  spectrum of compound **11** (150 MHz, CDCl<sub>3</sub>, 295 K)

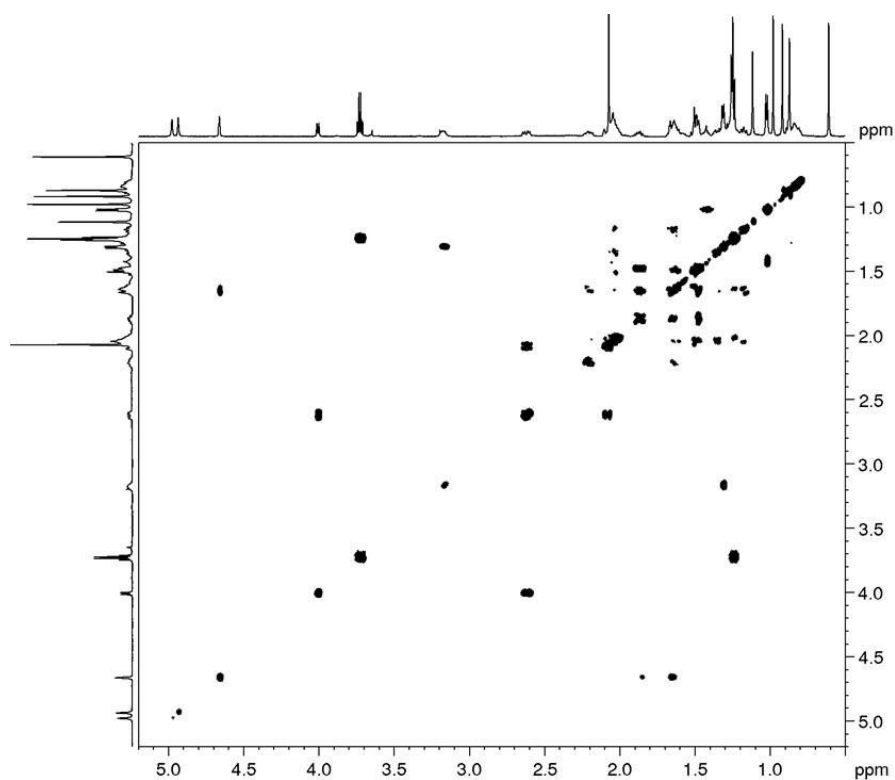

Figure S93. COSY spectrum of compound **11** (600 MHz, CDCl<sub>3</sub>, 295 K)

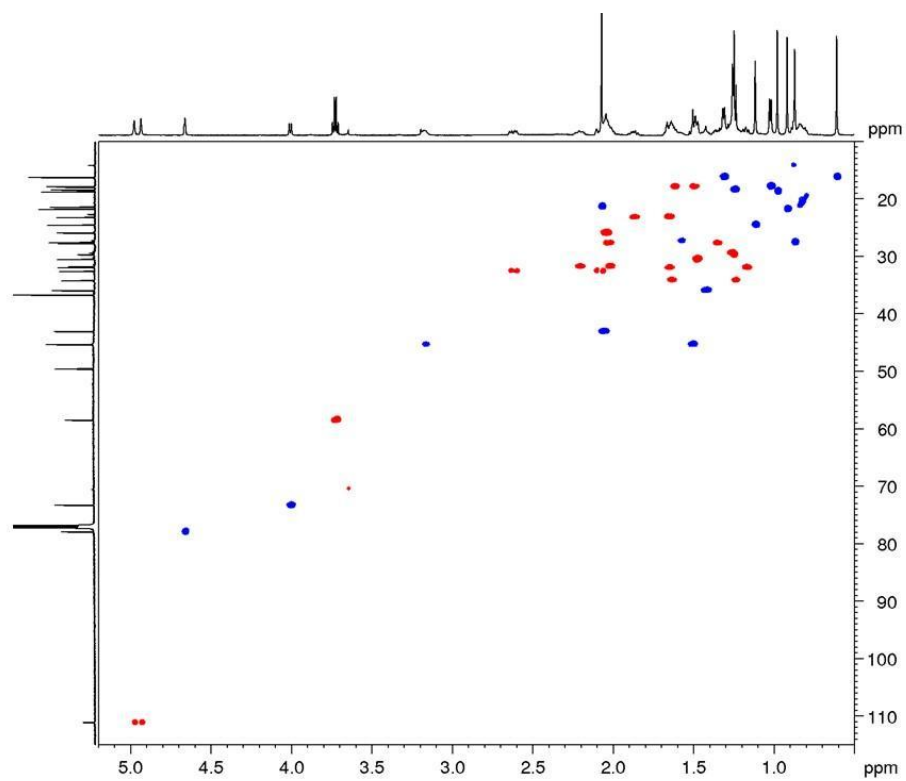

Figure S94. DEPT-edited HSQC spectrum of compound **11** (600 MHz, CDCl<sub>3</sub>, 295 K)

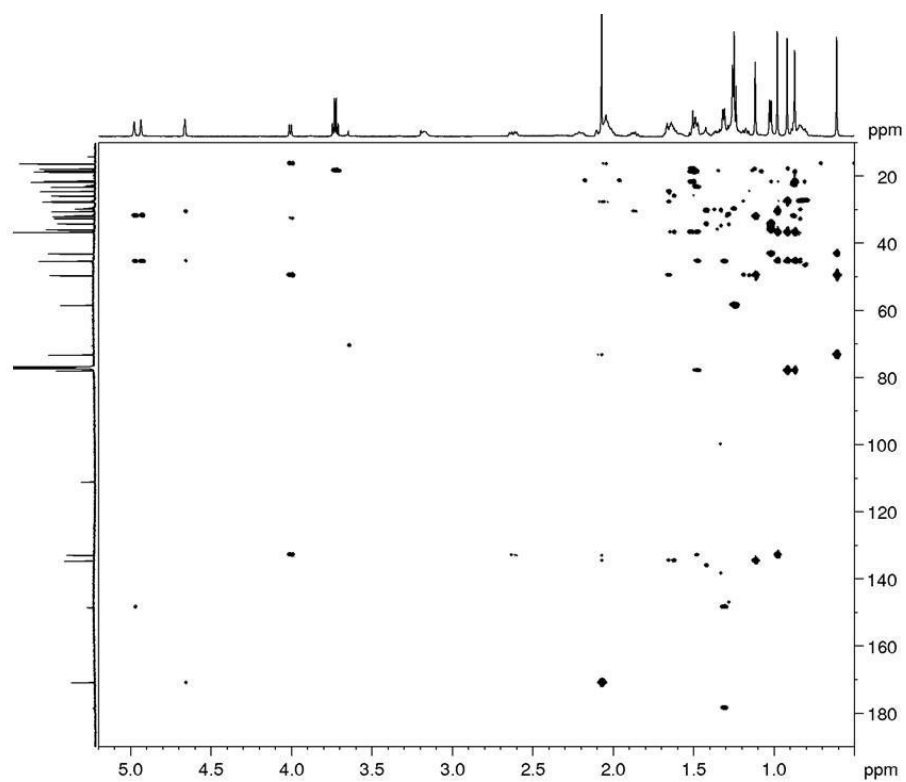

Figure S95. HMBC spectrum of compound **11** (600 MHz, CDCl<sub>3</sub>, 295 K)

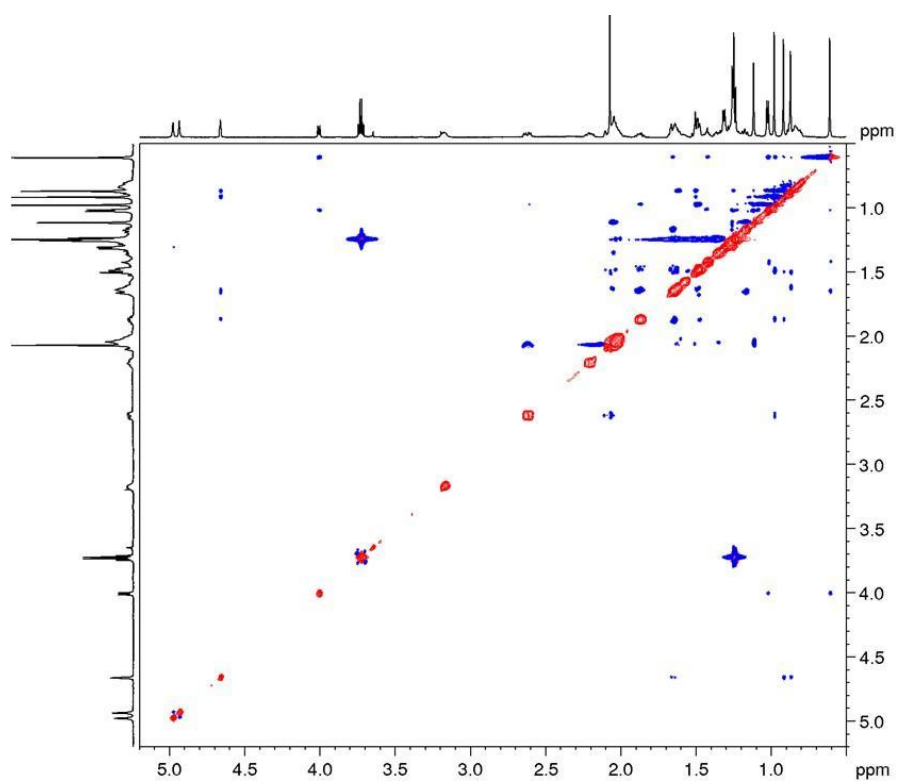

Figure S96. NOESY spectrum of compound **11** (600 MHz, CDCl<sub>3</sub>, 295 K)

## Spectra and spectral data on compound **12**

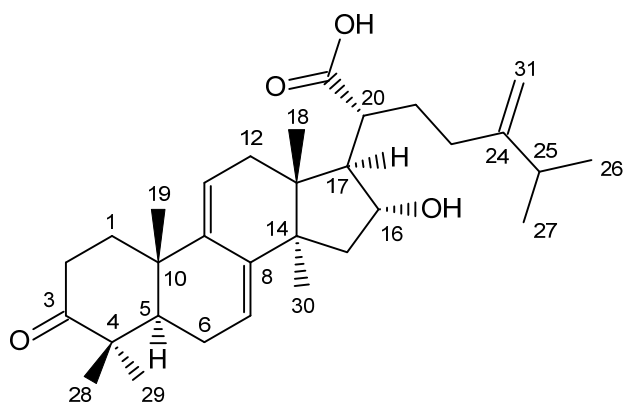

HR-ESI-MS (+)  $m/z$  483.3461  $[M + H]^+$  (483.3469 calcd. for  $C_{31}H_{47}O_4$ ;  $\Delta$  -1.6 ppm); HR-ESI-MSMS (CID = 15%, 30%, 45%) 465.3354, 309.2205

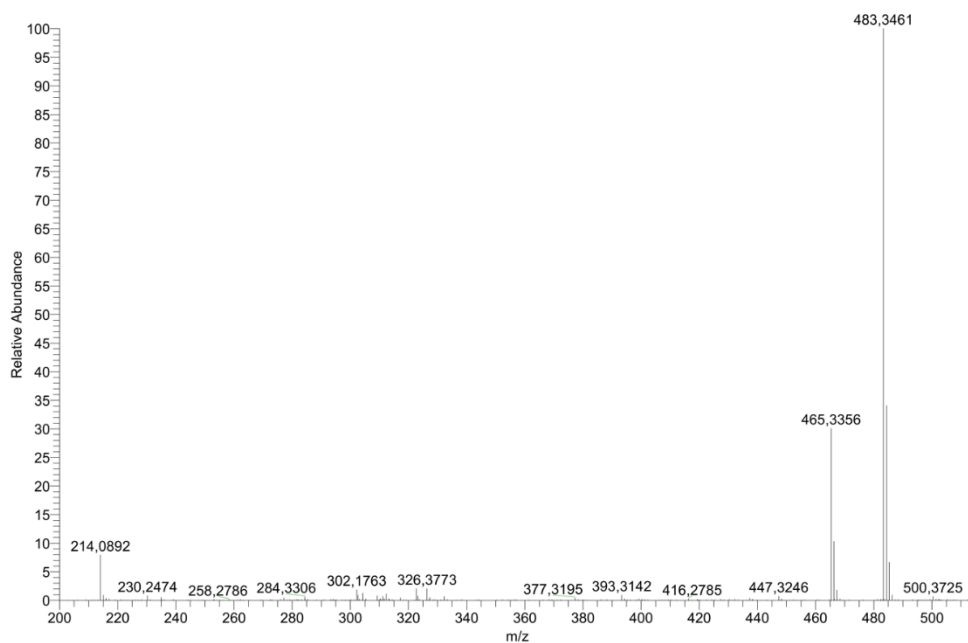

Figure S97. HR-ESI-MS spectrum of compound **12**

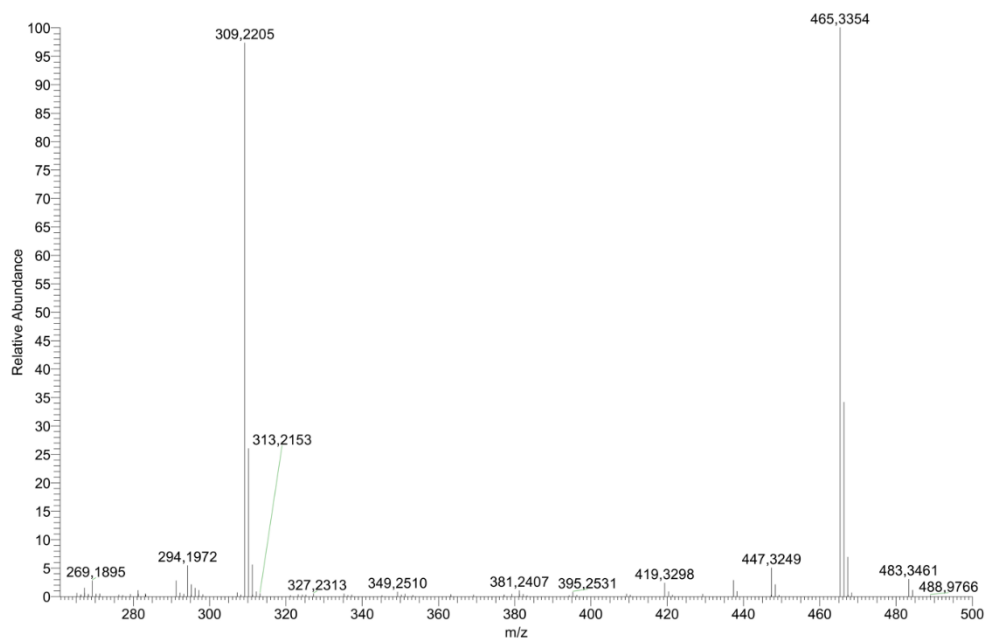

Figure S98. MS-MS spectrum of compound **12**

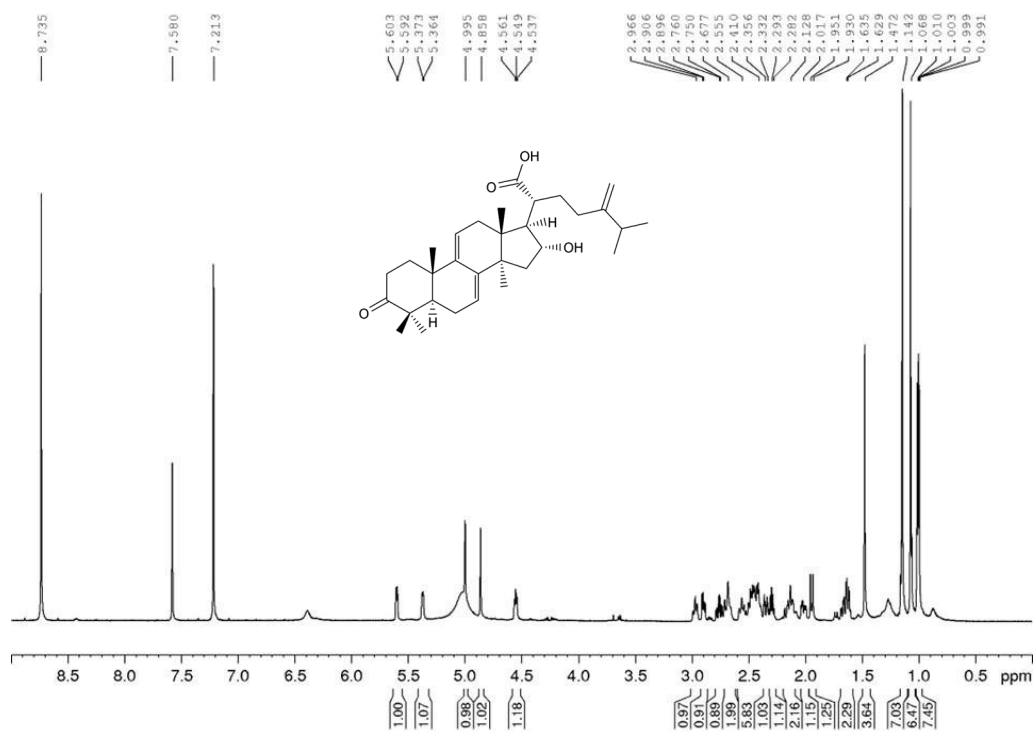

Figure S99. <sup>1</sup>H spectrum of compound **12** (600 MHz, pyridine-*d*<sub>5</sub>, 295 K)

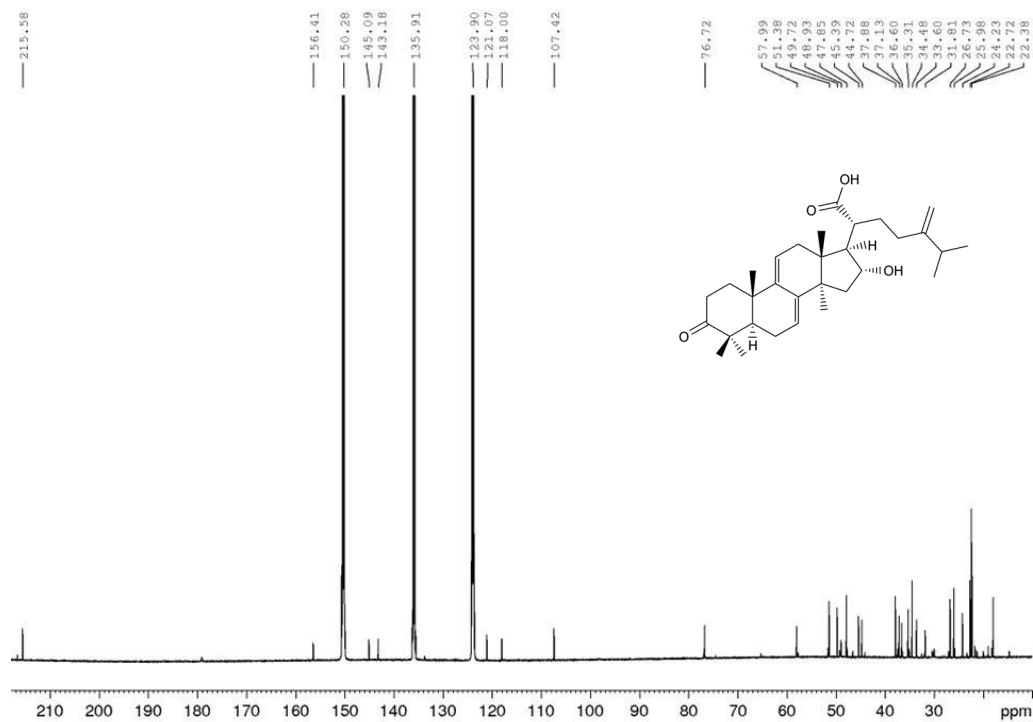

Figure S100.  $^{13}\text{C}$  spectrum of compound **12** (150 MHz, pyridine- $d_5$ , 295 K)

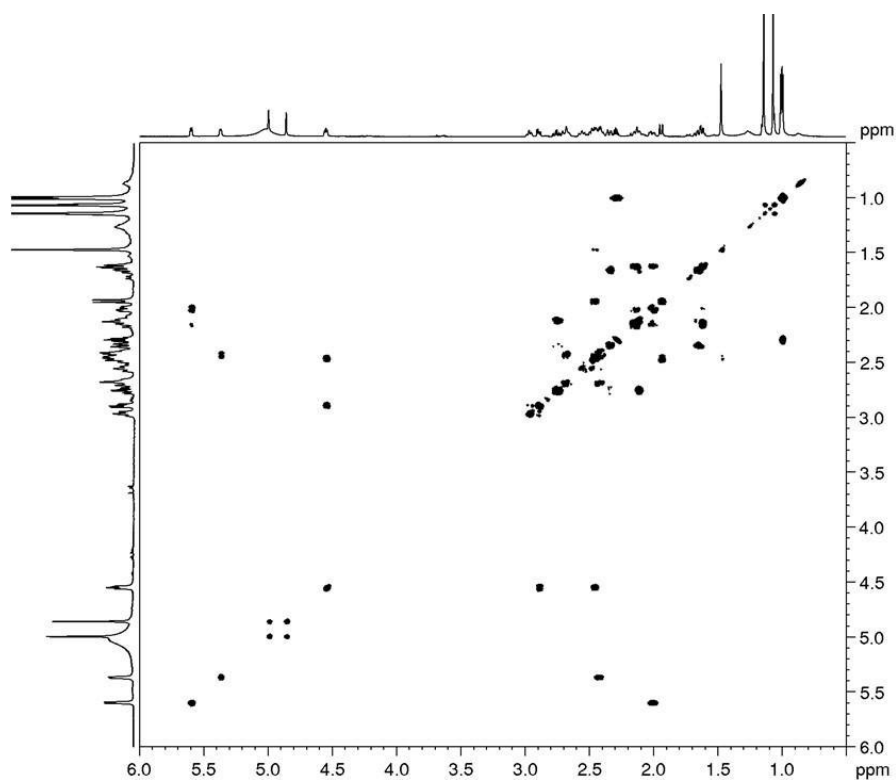

Figure S101. COSY spectrum of compound **12** (600 MHz, pyridine- $d_5$ , 295 K)

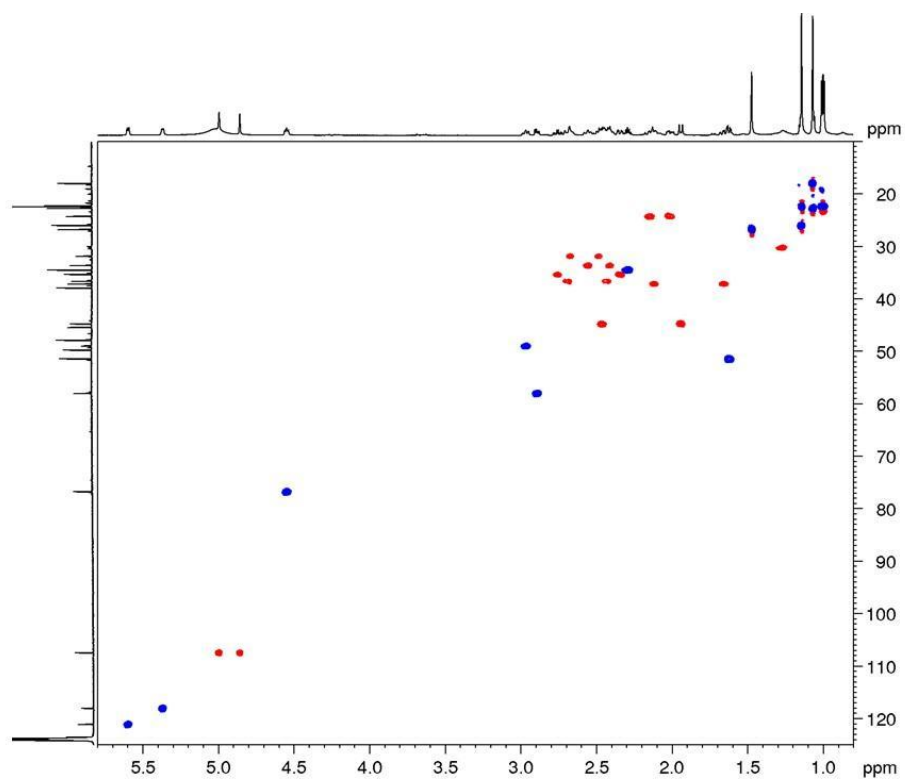

Figure S102. DEPT-edited HSQC spectrum of compound **12** (600 MHz, pyridine-*d*<sub>5</sub>, 295 K)

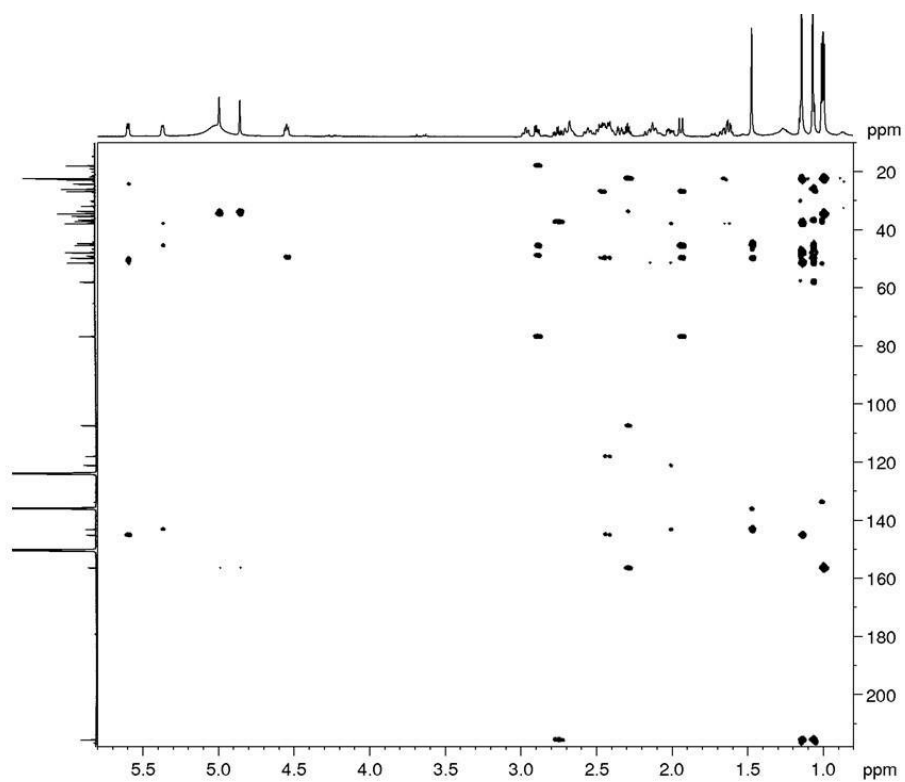

Figure S103. HMBC spectrum of compound **12** (600 MHz, pyridine-*d*<sub>5</sub>, 295 K)

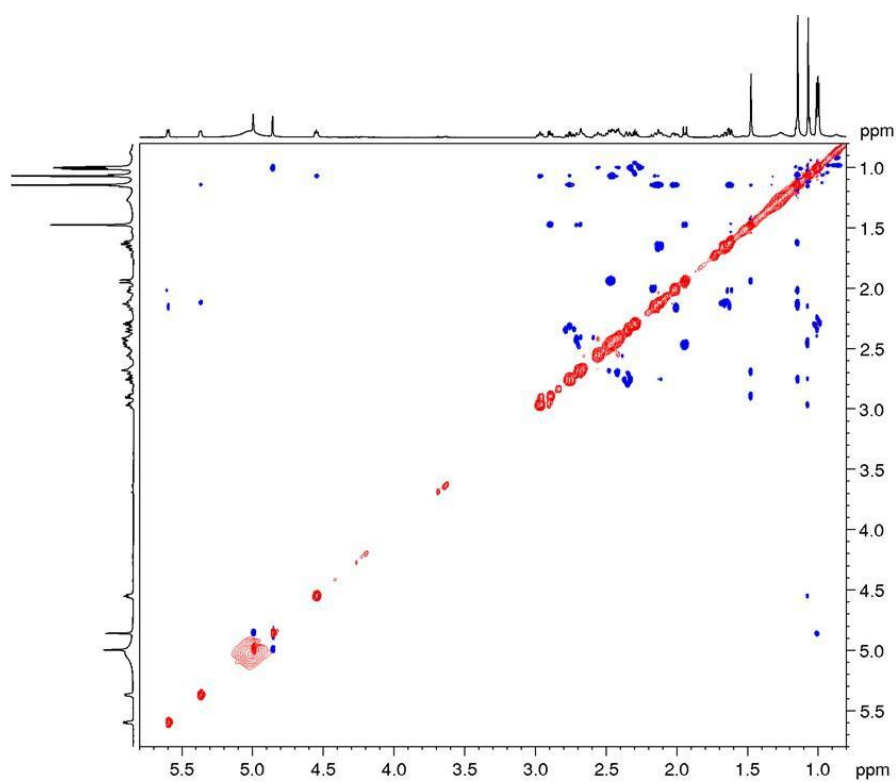

Figure S104. NOESY spectrum of compound **12** (600 MHz, pyridine-*d*<sub>5</sub>, 295 K)



Table S1. NMR Spectroscopic Data (600 MHz, CDCl<sub>3</sub><sup>a</sup>, pyridine-*d*<sub>5</sub><sup>b</sup>, tetrahydrofuran-*d*<sub>8</sub><sup>c</sup>, or methanol-*d*:pyridine-*d*<sub>5</sub> 19:1<sup>d</sup>, methanol-*d*<sup>e</sup>) for compounds **6-9**

| 1 <sup>c</sup> |                     |                 | 2 <sup>c</sup>           |                     |                 | 3 <sup>a</sup>           |                     |                 | 4 <sup>a</sup>           |                     |                 | 5 <sup>b</sup>           |                     |                 |                          |
|----------------|---------------------|-----------------|--------------------------|---------------------|-----------------|--------------------------|---------------------|-----------------|--------------------------|---------------------|-----------------|--------------------------|---------------------|-----------------|--------------------------|
| position       | δ <sub>c</sub> type |                 | δ <sub>H</sub> (J in Hz) | δ <sub>c</sub> type |                 | δ <sub>H</sub> (J in Hz) | δ <sub>c</sub> type |                 | δ <sub>H</sub> (J in Hz) | δ <sub>c</sub> type |                 | δ <sub>H</sub> (J in Hz) | δ <sub>c</sub> type |                 | δ <sub>H</sub> (J in Hz) |
| 1              | 35.7                | CH <sub>2</sub> | 1.82, m                  | 36.4                | CH <sub>2</sub> | 1.51, m                  | 30.7                | CH <sub>2</sub> | 1.43, m                  | 30.6                | CH <sub>2</sub> | 1.49, m                  | 31.6                | CH <sub>2</sub> | 1.75, m                  |
|                |                     |                 | 1.54, m                  |                     |                 | 1.09, m                  |                     |                 | 1.37, m                  |                     |                 | 1.41, m                  |                     |                 | 1.55, m                  |
|                |                     |                 | 2.31, dd, (10.0, 8.0)    |                     |                 | 1.48, m                  |                     |                 | 1.87, m                  |                     |                 | 1.90, m                  |                     |                 | 1.90, m                  |
| 2              | 36.8                | CH <sub>2</sub> | 2.28, dd, (8.0, 3.4)     | 28.8                | CH <sub>2</sub> | 1.67, m                  | 23.1                | CH <sub>2</sub> | 1.67, m                  | 23.2                | CH <sub>2</sub> | 1.72, m                  | 24.1                | CH <sub>2</sub> | 1.78, m                  |
|                |                     |                 | 4.76, br s               |                     |                 | 4.68, br s               |                     |                 | 4.76, br s               |                     |                 | 4.97, br s               |                     |                 |                          |
|                |                     |                 |                          |                     |                 |                          |                     |                 |                          |                     |                 |                          |                     |                 |                          |
| 3              | 216.0               | C               |                          | 78.3                | CH              | 2.97, m                  | 77.6                | CH              |                          | 80.6                | CH              |                          | 78.4                | CH              |                          |
| 4              | 52.8                | C               |                          | 39.7                | C               |                          | 36.7                | C               |                          | 36.8                | C               |                          | 37.4                | C               |                          |
| 5              | 44.3                | CH              | 2.17, m                  | 51.5                | CH              | 0.96, m                  | 45.2                | CH              | 1.50, m                  | 45.3                | CH              | 1.47, m                  | 46.4                | CH              | 1.83, m                  |
| 6              | 20.2                | CH <sub>2</sub> | 1.49, m                  | 19.1                | CH <sub>2</sub> | 1.65, m                  | 17.8                | CH <sub>2</sub> | 1.67, m                  | 18.0                | CH <sub>2</sub> | 1.59, m                  | 18.8                | CH <sub>2</sub> | 1.62, m                  |
|                |                     |                 | 1.44, m                  |                     |                 | 1.49, m                  |                     |                 | 1.56, m                  |                     |                 | 1.49, m                  |                     |                 | 1.52, m                  |
|                |                     |                 | 2.03, m                  |                     |                 | 2.06, m                  |                     |                 | 2.12, m                  |                     |                 | 2.04, m                  |                     |                 | 2.17, m                  |
| 7              | 27.2                | CH <sub>2</sub> | 1.93, m                  | 27.2                | CH <sub>2</sub> | 1.95, m                  | 25.8                | CH <sub>2</sub> | 2.07, m                  | 25.9                | CH <sub>2</sub> | 2.04, m                  | 26.8                | CH <sub>2</sub> | 2.12, m                  |
|                |                     |                 |                          |                     |                 |                          |                     |                 |                          |                     |                 |                          |                     |                 |                          |
|                |                     |                 |                          |                     |                 |                          |                     |                 |                          |                     |                 |                          |                     |                 |                          |
| 8              | 136.6               | C               |                          | 135.8               | C               |                          | 135.0               | C               |                          | 134.2               | C               |                          | 135.5               | C               |                          |
| 9              | 134.0               | C               |                          | 136.6               | C               |                          | 135.1               | C               |                          | 134.3               | C               |                          | 134.2               | C               |                          |
| 10             | 37.6                | C               |                          | 37.8                | C               |                          | 36.7                | C               |                          | 36.8                | C               |                          | 37.5                | C               |                          |
| 11             | 21.4                | CH <sub>2</sub> | 1.94, m                  | 40.5                | CH <sub>2</sub> | 2.82, m                  | 39.9                | CH <sub>2</sub> | 2.90, m                  | 20.9                | CH <sub>2</sub> | 2.01, m                  | 34.9                | CH <sub>2</sub> | 2.76, m                  |
|                |                     |                 | 2.49, m                  |                     |                 | 2.71, m                  |                     |                 |                          |                     |                 | 2.50, m                  |                     |                 |                          |
|                |                     |                 |                          |                     |                 |                          |                     |                 |                          |                     |                 |                          |                     |                 |                          |
| 12             | 30.0                | CH <sub>2</sub> | 1.71, m                  | 210.5               | C               |                          | 212.7               | C               |                          | 30.9                | CH <sub>2</sub> | 1.74, m                  | 72.5                | CH              | 4.27, d (7.6)            |
|                |                     |                 | 1.39, m                  |                     |                 |                          |                     |                 | 1.69, m                  |                     |                 |                          |                     |                 |                          |
|                |                     |                 |                          |                     |                 |                          |                     |                 |                          |                     |                 |                          |                     |                 |                          |
| 13             | 46.5                | C               |                          | 55.0                | C               |                          | 54.5                | C               |                          | 44.5                | C               |                          | 50.5                | C               |                          |
| 14             | 49.4                | C               |                          | 60.0                | C               |                          | 59.4                | C               |                          | 49.9                | C               |                          | 50.4                | C               |                          |
| 15             | 44.0                | CH <sub>2</sub> | 2.03, m                  | 30.9                | CH <sub>2</sub> | 1.75, m                  | 30.1                | CH <sub>2</sub> | 1.82, m                  | 30.8                | CH <sub>2</sub> | 1.60, m                  | 33.1                | CH <sub>2</sub> | 1.76, m                  |
|                |                     |                 | 1.15, m                  |                     |                 | 1.20, m                  |                     |                 | 1.35, m                  |                     |                 | 1.18, m                  |                     |                 | 1.25, m                  |
|                |                     |                 |                          |                     |                 | 1.91, m                  |                     |                 | 2.01, m                  |                     |                 | 1.94, m                  |                     |                 | 2.11, m                  |
| 16             | 77.1                | CH              | 3.89, m                  | 28.6                | CH <sub>2</sub> | 1.29, m                  | 27.8                | CH <sub>2</sub> | 1.37, m                  | 28.2                | CH <sub>2</sub> | 1.31, m                  | 28.7                | CH <sub>2</sub> | 1.40, m                  |
| 17             | 57.3                | CH              | 1.96, m                  | 43.5                | CH              | 2.06, m                  | 42.4                | CH              | 2.19, m                  | 50.3                | CH              | 1.50, m                  | 43.5                | CH              | 2.65, m                  |
| 18             | 17.8                | CH <sub>3</sub> | 0.69, s                  | 12.9                | CH <sub>3</sub> | 0.94, s                  | 12.6                | CH <sub>3</sub> | 1.05, s                  | 15.7                | CH <sub>3</sub> | 0.69, s                  | 17.2                | CH <sub>3</sub> | 0.77, s                  |
| 19             | 19.2                | CH <sub>3</sub> | 0.95, s                  | 19.5                | CH <sub>3</sub> | 0.98, s                  | 19.0                | CH <sub>3</sub> | 1.08, s                  | 18.9                | CH <sub>3</sub> | 1.00, s                  | 19.4                | CH <sub>3</sub> | 1.03, s                  |
| 20             | 48.3                | CH              | 2.24, m                  | 37.7                | CH              | 1.18, m                  | 36.6                | CH              | 1.27, m                  | 36.3                | CH              | 1.41, m                  | 37.3                | CH              | 1.53, m                  |
| 21             | 177.4               | C               |                          | 19.6                | CH <sub>3</sub> | 0.78, d (6.4)            | 19.0                | CH <sub>3</sub> | 0.89, d (5.8)            | 18.6                | CH <sub>3</sub> | 0.93, m                  | 18.3                | CH <sub>3</sub> | 1.28, m                  |
|                |                     |                 | 1.53, m                  |                     |                 | 1.62, m                  |                     |                 | 1.58, m                  |                     |                 | 1.77, m                  |                     |                 |                          |
|                |                     |                 |                          |                     |                 |                          |                     |                 |                          |                     |                 |                          |                     |                 |                          |
| 22             | 31.6                | CH <sub>2</sub> | 1.92, m                  | 35.3                | CH <sub>2</sub> | 1.14, m                  | 34.0                | CH <sub>2</sub> | 1.27, m                  | 34.2                | CH <sub>2</sub> | 1.19, m                  | 35.4                | CH <sub>2</sub> | 1.38, m                  |
|                |                     |                 | 1.64, m                  |                     |                 |                          |                     |                 |                          |                     |                 |                          |                     |                 |                          |
|                |                     |                 |                          |                     |                 |                          |                     |                 |                          |                     |                 |                          |                     |                 |                          |
| 23             | 33.4                | CH <sub>2</sub> | 1.96, m                  | 32.9                | CH <sub>2</sub> | 2.14, m                  | 32.1                | CH <sub>2</sub> | 2.21                     | 31.7                | CH <sub>2</sub> | 2.19, m                  | 32.7                | CH <sub>2</sub> | 2.37, m                  |
|                |                     |                 | 1.87, m                  |                     |                 | 1.09, m                  |                     |                 | 2.02                     |                     |                 | 2.00, m                  |                     |                 | 2.17, m                  |
|                |                     |                 |                          |                     |                 |                          |                     |                 |                          |                     |                 |                          |                     |                 |                          |
| 24             | 156.7               | C               |                          | 150.9               | C               |                          | 148.5               | C               |                          | 148.3               | C               |                          | 150.2               | C               |                          |
| 25             | 34.8                | CH              | 2.14, m                  | 46.2                | CH              | 2.96, m                  | 45.1                | CH              | 3.17, m                  | 45.0                | CH              | 3.18, q (7.0)            | 46.2                | CH              | 3.32, q (7.1)            |
| 26             | 22.4                | CH <sub>3</sub> | 0.91, d (6.9)            | 175.6               | C               |                          | 177.7               | C               |                          | 179.6               | C               |                          | 175.3               | C               |                          |
| 27             | 22.2                | CH <sub>3</sub> | 0.92, d (6.9)            | 17.0                | CH <sub>3</sub> | 1.10, d (7.4)            | 16.3                | CH <sub>3</sub> | 1.31, d (6.7)            | 16.1                | CH <sub>3</sub> | 1.31, d (7.0)            | 17.1                | CH <sub>3</sub> | 1.38, d (7.1)            |
| 28             | 68.3                | CH <sub>2</sub> | 3.39, dd (10.2, 2.4)     | 28.5                | CH <sub>3</sub> | 0.88, s                  | 27.5                | CH <sub>3</sub> | 0.88, s                  | 27.6                | CH <sub>3</sub> | 0.88, s                  | 28.5                | CH <sub>3</sub> | 1.04, s                  |

|                    |       |                 |                         |       |                 |                          |       |                 |                          |       |                 |                          |                    |                                          |
|--------------------|-------|-----------------|-------------------------|-------|-----------------|--------------------------|-------|-----------------|--------------------------|-------|-----------------|--------------------------|--------------------|------------------------------------------|
|                    |       |                 | 3.16, dd<br>(10.2, 2.4) |       |                 |                          |       |                 |                          |       |                 |                          |                    |                                          |
| 29                 | 17.5  | CH <sub>3</sub> | 0.78, s                 | 16.1  | CH <sub>3</sub> | 0.69, s                  | 21.7  | CH <sub>3</sub> | 0.94, s                  | 21.7  | CH <sub>3</sub> | 0.93, m                  | 22.4               | CH <sub>3</sub> 0.91, s                  |
| 30                 | 25.3  | CH <sub>3</sub> | 1.05, s                 | 24.3  | CH <sub>3</sub> | 0.65, s                  | 24.1  | CH <sub>3</sub> | 0.82, s                  | 24.2  | CH <sub>3</sub> | 0.91, s                  | 25.7               | CH <sub>3</sub> 1.43, s                  |
| 31                 | 106.9 | CH <sub>2</sub> | 4.61, br s              | 110.3 | CH <sub>2</sub> | 4.77, br s<br>4.71, br s | 111.1 | CH <sub>2</sub> | 4.97, br s<br>4.94, br s | 111.4 | CH <sub>2</sub> | 4.97, br s<br>4.94, br s | 111.3              | CH <sub>2</sub> 5.10, br s<br>5.06, br s |
| 1'                 |       |                 |                         |       |                 |                          | 170.8 | C               |                          | 167.2 | C               |                          | 172.4 <sup>d</sup> | C                                        |
| 2'                 |       |                 |                         |       |                 |                          |       |                 |                          | 40.2  | CH <sub>2</sub> | 3.64, m                  | 47.0 <sup>d</sup>  | CH <sub>2</sub> 2.64 <sup>d</sup> , m    |
| 3'                 |       |                 |                         |       |                 |                          |       |                 |                          | 170.6 | C               |                          | 71.0 <sup>d</sup>  | C                                        |
| 4'                 |       |                 |                         |       |                 |                          |       |                 |                          |       |                 |                          | 47.0 <sup>d</sup>  | CH <sub>2</sub> 2.64 <sup>d</sup> , m    |
| 5'                 |       |                 |                         |       |                 |                          |       |                 |                          |       |                 |                          | 172.4 <sup>d</sup> | C                                        |
| 1'-CH <sub>3</sub> |       |                 |                         |       |                 |                          | 21.3  | CH <sub>3</sub> | 2.07, s                  |       |                 |                          |                    |                                          |
| 3'-CH <sub>3</sub> |       |                 |                         |       |                 |                          |       |                 |                          |       |                 |                          | 27.9 <sup>d</sup>  | CH <sub>3</sub> 1.37 <sup>d</sup> , m    |
| 26-CH <sub>3</sub> |       |                 |                         |       |                 |                          |       |                 |                          |       |                 |                          | 52.3 <sup>d</sup>  | CH <sub>3</sub> 3.67 <sup>d</sup> , m    |

Table S2. NMR Spectroscopic Data (600 MHz, CDCl<sub>3</sub><sup>a</sup>, pyridine-*d*<sub>5</sub><sup>b</sup>, tetrahydrofuran-*d*<sub>8</sub><sup>c</sup>, or methanol-*d*:pyridine-*d*<sub>5</sub> 19:1<sup>d</sup>, methanol-*d*<sup>e</sup>) for compounds **10-12**

| position           | 10 <sup>b</sup> |                 |                          | 11 <sup>a</sup> |                 |                          | 12 <sup>b</sup> |                 |                          |
|--------------------|-----------------|-----------------|--------------------------|-----------------|-----------------|--------------------------|-----------------|-----------------|--------------------------|
|                    | δ <sub>c</sub>  | type            | δ <sub>H</sub> (J in Hz) | δ <sub>c</sub>  | type            | δ <sub>H</sub> (J in Hz) | δ <sub>c</sub>  | type            | δ <sub>H</sub> (J in Hz) |
| 1                  | 31.1            | CH <sub>2</sub> | 2.14, m                  | 30.5            | CH <sub>2</sub> | 1.48, m                  | 37.1            | CH <sub>2</sub> | 2.12, m<br>1.66, m       |
| 2                  | 27.4            | CH <sub>2</sub> | 2.05, m<br>1.82, m       | 23.2            | CH <sub>2</sub> | 1.87, m<br>1.65, m       | 35.3            | CH <sub>2</sub> | 2.75, m<br>2.34, m       |
| 3                  | 75.5            | CH              | 3.66, br s               | 77.9            | CH              | 4.66, br s               | 215.6           | C               |                          |
| 4                  | 38.6            | C               |                          | 36.7            | C               |                          | 47.9            | C               |                          |
| 5                  | 45.1            | CH              | 2.08, m                  | 45.3            | CH              | 1.50, m                  | 51.4            | CH              | 1.62, m                  |
| 6                  | 19.1            | CH <sub>2</sub> | 1.74, m<br>1.61, m       | 17.9            | CH <sub>2</sub> | 1.62, m<br>1.50, m       | 24.2            | CH <sub>2</sub> | 2.15, m<br>2.01, m       |
| 7                  | 27.0            | CH <sub>2</sub> | 2.15, m                  | 25.9            | CH <sub>2</sub> | 2.04, m                  | 121.1           | CH              | 5.60, d (6.4)            |
| 8                  | 135.3           | C               |                          | 134.6           | C               |                          | 143.2           | C               |                          |
| 9                  | 134.7           | C               |                          | 132.9           | C               |                          | 145.1           | C               |                          |
| 10                 | 37.8            | C               |                          | 36.7            | C               |                          | 37.9            | C               |                          |
| 11                 | 35.1            | CH <sub>2</sub> | 2.81, m<br>2.52, m       | 32.6            | CH <sub>2</sub> | 2.62, m<br>2.09, m       | 118.0           | CH              | 5.37, d (6.0)            |
| 12                 | 72.5            | CH              | 4.28, d (7.5)            | 73.2            | CH              | 4.00, d (8.0)            | 36.6            | C               | 2.69, m<br>2.43, m       |
| 13                 | 50.5            | C               |                          | 49.5            | C               |                          | 45.4            | C               |                          |
| 14                 | 50.4            | C               |                          | 49.6            | C               |                          | 49.7            | C               |                          |
| 15                 | 33.1            | CH <sub>2</sub> | 1.76, m                  | 32.0            | CH <sub>2</sub> | 1.65, m<br>1.17, m       | 44.7            | CH <sub>2</sub> | 2.46, m<br>1.94, m       |
| 16                 | 28.8            | CH <sub>2</sub> | 2.14, m<br>1.43, m       | 27.7            | CH <sub>2</sub> | 2.02, m<br>1.35, m       | 76.7            | CH              | 4.55, m                  |
| 17                 | 43.6            | CH              | 2.68, m                  | 43.1            | CH              | 2.06, m                  | 58.0            | CH              | 2.89, m                  |
| 18                 | 17.2            | CH <sub>3</sub> | 0.79, s                  | 16.2            | CH <sub>3</sub> | 0.61, s                  | 18.0            | CH <sub>3</sub> | 1.07, s                  |
| 19                 | 19.7            | CH <sub>3</sub> | 1.11, s                  | 18.7            | CH <sub>3</sub> | 0.98, s                  | 22.4            | CH <sub>3</sub> | 1.14, s                  |
| 20                 | 37.3            | CH              | 1.58, m                  | 35.9            | CH              | 1.42, m                  | 48.9            | CH              | 2.97, m                  |
| 21                 | 18.4            | CH              | 1.31, d (6.1)            | 17.8            | CH <sub>3</sub> | 1.02, d (6.4)            | 179.1           | C               |                          |
| 22                 | 35.5            | CH <sub>2</sub> | 1.89, m<br>1.51, m       | 34.2            | CH <sub>2</sub> | 1.63, m<br>1.24, m       | 31.8            | CH <sub>2</sub> | 2.67, m<br>2.49, m       |
| 23                 | 32.9            | CH <sub>2</sub> | 2.60, m<br>2.34, m       | 31.8            | CH <sub>2</sub> | 2.21, m<br>2.02, m       | 33.6            | CH <sub>2</sub> | 2.56, m<br>2.41, m       |
| 24                 | 151.1           | C               |                          | 148.5           | C               |                          | 156.4           | C               |                          |
| 25                 | 46.9            | CH              | 3.51, m                  | 45.3            | CH              | 3.18, m                  | 34.5            | CH              | 2.29, m                  |
| 26                 | 177.4           | C               |                          | 178.5           | C               |                          | 22.2            | CH <sub>3</sub> | 1.00, d (6.8)            |
| 27                 | 17.5            | CH <sub>3</sub> | 1.54, d (6.7)            | 16.2            | CH <sub>3</sub> | 1.31, d (6.9)            | 22.2            | CH <sub>3</sub> | 1.00, d (6.8)            |
| 28                 | 29.5            | CH <sub>3</sub> | 1.26, s                  | 27.6            | CH <sub>3</sub> | 0.87, s                  | 26.0            | CH <sub>3</sub> | 1.14, s                  |
| 29                 | 23.1            | CH <sub>3</sub> | 0.97, s                  | 21.8            | CH <sub>3</sub> | 0.92, s                  | 22.7            | CH <sub>3</sub> | 1.07, s                  |
| 30                 | 25.6            | CH <sub>3</sub> | 1.43, s                  | 24.5            | CH <sub>3</sub> | 1.12, s                  | 26.7            | CH <sub>3</sub> | 1.47, s                  |
| 31                 | 110.8           | CH <sub>2</sub> | 5.25, br s<br>5.13, br s | 111.1           | CH <sub>2</sub> | 4.98, br s<br>4.94, br s | 107.4           | CH <sub>2</sub> | 5.00, br s<br>4.86, br s |
| 1'                 |                 |                 |                          | 170.9           | C               |                          |                 |                 |                          |
| 1'-CH <sub>3</sub> |                 |                 |                          | 21.4            | CH <sub>3</sub> | 2.07, m                  |                 |                 |                          |

Table S3. Chemosensitizing Activity of Compounds 3-4, and 7-12 on Colo 320 Adenocarcinoma Cells

| Compound | c(IC <sub>50</sub> *4) [uM] | Drug:Doxo ratio | CI    | SD     | type               |
|----------|-----------------------------|-----------------|-------|--------|--------------------|
| <b>3</b> | 119.13                      | 13.82:1         | 0.907 | 0.12   | Nearly additive    |
|          |                             | 27.64:1         | 0.601 | 0.0495 | Synergism          |
|          |                             | 55.28:1         | 0.972 | 0.081  | Nearly additive    |
|          |                             | 110.56:1        | 1.027 | 0.1133 | Nearly additive    |
|          |                             | 221.12:1        | 0.944 | 0.1212 | Nearly additive    |
|          |                             | 442.24:1        | 1.471 | 0.3143 | Strong antagonism  |
| <b>4</b> | 276.66                      | 32.08:1         | 0.816 | 0.2102 | Moderate synergism |
|          |                             | 64.16:1         | 0.691 | 0.0705 | Synergism          |
|          |                             | 128.32:1        | 0.734 | 0.0845 | Moderate synergism |
|          |                             | 256.64:1        | 0.739 | 0.092  | Moderate synergism |
|          |                             | 513.28:1        | 0.904 | 0.1805 | Nearly additive    |
|          |                             | 1026.56:1       | 1.421 | 0.2691 | Antagonism         |
| <b>7</b> | 246.84                      | 28.63:1         | 1.002 | 0.0372 | Nearly additive    |
|          |                             | 57.26:1         | 0.972 | 0.1029 | Nearly additive    |
|          |                             | 114.52:1        | 0.419 | 0.0697 | Synergism          |
|          |                             | 229.04:1        | 1.371 | 0.1618 | Antagonism         |
|          |                             | 458.08:1        | 1.347 | 0.2608 | Antagonism         |
|          |                             | 916.16:1        | 1.295 | 0.1921 | Antagonism         |
| <b>8</b> | 144.74                      | 16.8:1          | 0.905 | 0.0877 | Nearly additive    |
|          |                             | 33.6:1          | 0.889 | 0.0332 | Slight synergism   |
|          |                             | 67.2:1          | 0.574 | 0.0698 | Synergism          |
|          |                             | 134.4:1         | 0.713 | 0.0972 | Moderate synergism |
|          |                             | 268.8:1         | 0.64  | 0.0956 | Synergism          |
|          |                             | 537.6:1         | 1.042 | 0.0934 | Nearly additive    |
| <b>9</b> | 157.84                      | 18.23:1         | 1.316 | 0.21   | Antagonism         |
|          |                             | 36.64:1         | 0.656 | 0.0528 | Synergism          |
|          |                             | 73.28:1         | 0.653 | 0.0839 | Synergism          |

|           |        |          |       |        |                    |
|-----------|--------|----------|-------|--------|--------------------|
|           |        | 146.56:1 | 0.447 | 0.0534 | Synergism          |
|           |        | 293.12:1 | 0.559 | 0.0681 | Synergism          |
|           |        | 586.24:1 | 0.276 | 0.096  | Strong synergism   |
| <b>10</b> | 195.9  | 22.72:1  | 1.258 | 0.3766 | Antagonism         |
|           |        | 45.44:1  | 1.09  | 0.1509 | Nearly additive    |
|           |        | 90.88:1  | 0.779 | 0.0819 | Moderate synergism |
|           |        | 181.76:1 | 0.798 | 0.1561 | Moderate synergism |
|           |        | 363.52:1 | 0.988 | 0.2678 | Nearly additive    |
|           |        | 727.04:1 | 1.438 | 0.3819 | Antagonism         |
| <b>11</b> | 118.96 | 13.8:1   | 1.456 | 0.2324 | Strong antagonism  |
|           |        | 27.6:1   | 0.841 | 0.14   | Moderate synergism |
|           |        | 55.2:1   | 0.911 | 0.2554 | Nearly additive    |
|           |        | 110.4:1  | 1.491 | 0.2423 | Strong antagonism  |
|           |        | 220.8:1  | 1.89  | 0.3337 | Strong antagonism  |
|           |        | 441.6:1  | 1.938 | 0.3863 | Strong antagonism  |
| <b>12</b> | 82.85  | 9.62:1   | 1.992 | 0.3279 | Strong antagonism  |
|           |        | 19.24:1  | 1.42  | 0.2308 | Antagonism         |
|           |        | 38.48:1  | 0.608 | 0.0324 | Synergism          |
|           |        | 76.96:1  | 0.895 | 0.0678 | Slight synergism   |
|           |        | 153.92:1 | 0.736 | 0.0458 | Moderate synergism |
|           |        | 307.84:1 | 0.824 | 0.2692 | Moderate synergism |

| Range    | Description           |
|----------|-----------------------|
| <0.1     | Very strong synergism |
| 0.1-0.3  | Strong synergism      |
| 0.3-0.7  | Synergism             |
| 0.7-0.85 | Moderate Synergism    |

|          |                        |
|----------|------------------------|
| 0.85-0.9 | Slight synergism       |
| 0.9-1.1  | Nearly additive        |
| 1.1-1.2  | Moderate antagonism    |
| 1.2-1.45 | Antagonism             |
| 1.45-3.3 | Strong antagonism      |
| 3.3-10   | Very strong antagonism |

Doxo: doxorubicin, CI: combination index, SD: standard deviation

Table S4. P-gp Efflux Pump Inhibitory Activity of Compounds **1–12** on MDR Colo 320 Colon Adenocarcinoma Cell Line

| Samples            | conc. $\mu\text{M}$ | FSC  | SSC  | FL-1   | FAR          |
|--------------------|---------------------|------|------|--------|--------------|
| Tariquidar         | 0.2                 | 1557 | 1038 | 45.800 | 15.091       |
| Compound <b>1</b>  | 20                  | 1696 | 898  | 2.350  | 0.774        |
| Compound <b>2</b>  | 20                  | 1603 | 947  | 3.190  | 1.051        |
| Compound <b>3</b>  | 20                  | 1239 | 889  | 13.500 | <b>4.448</b> |
| Compound <b>4</b>  | 20                  | 1349 | 930  | 4.060  | 1.338        |
| Compound <b>5</b>  | 20                  | 1332 | 1012 | 23.100 | <b>7.611</b> |
| Compound <b>6</b>  | 20                  | 1681 | 845  | 1.170  | 0.386        |
| Compound <b>7</b>  | 20                  | 1593 | 865  | 1.800  | 0.593        |
| Compound <b>8</b>  | 20                  | 1356 | 916  | 6.310  | <b>2.079</b> |
| Compound <b>9</b>  | 20                  | 1427 | 928  | 2.860  | 0.942        |
| Compound <b>10</b> | 20                  | 1383 | 902  | 11.600 | <b>3.822</b> |
| Compound <b>11</b> | 20                  | 1463 | 940  | 7.560  | <b>2.491</b> |
| Compound <b>12</b> | 20                  | 1420 | 1007 | 6.880  | <b>2.267</b> |
| DMSO               | 2%                  | 1654 | 675  | 1.220  | 0.402        |

FSC: forward scatter count; SSC: side scatter count; FL-1: mean fluorescence; FAR: fluorescence activity ratios
